# Supplementary material for: Are medical record front page data suitable for risk adjustment in hospital performance measurement? Development and validation of a risk model of in-hospital mortality after acute myocardial infarction
Source: PubMed Central journal article supplement — BMJ Open. 2021 Apr 9;11(4):e045053. doi: 10.1136/bmjopen-2020-045053 (PMC8043007; doi:10.1136/bmjopen-2020-045053), 2021-04-09
Supplement: bmjopen-2020-045053.draft_revisions.pdf [file bmjopen-2020-045053.draft_revisions.pdf]

# BMJ Open

BMJ Open is committed to open peer review. As part of this commitment we make the peer review history of every article we publish publicly available.

When an article is published we post the peer reviewers' comments and the authors' responses online. We also post the versions of the paper that were used during peer review. These are the versions that the peer review comments apply to.

The versions of the paper that follow are the versions that were submitted during the peer review process. They are not the versions of record or the final published versions. They should not be cited or distributed as the published version of this manuscript.

BMJ Open is an open access journal and the full, final, typeset and author-corrected version of record of the manuscript is available on our site with no access controls, subscription charges or pay-per-view fees (<http://bmjopen.bmj.com>).

If you have any questions on BMJ Open's open peer review process please email [info.bmjopen@bmj.com](mailto:info.bmjopen@bmj.com)

# BMJ Open

## Are Medical Record Front Page Data Suitable for Risk Adjustment in Hospital Performance Measurement: A Risk Model of In-hospital Mortality after Acute Myocardial Infarction

|                               |                                                                                                                                                                                                                                                                                                                                                                                                                                                                                                                                                                                                                                                                                                                                                                                                                                                                                                                                                                                                                                                                                                                                                                                                                                                                                                                                                                                                                                                                                                                                                                                                                                                                                                                       |
|-------------------------------|-----------------------------------------------------------------------------------------------------------------------------------------------------------------------------------------------------------------------------------------------------------------------------------------------------------------------------------------------------------------------------------------------------------------------------------------------------------------------------------------------------------------------------------------------------------------------------------------------------------------------------------------------------------------------------------------------------------------------------------------------------------------------------------------------------------------------------------------------------------------------------------------------------------------------------------------------------------------------------------------------------------------------------------------------------------------------------------------------------------------------------------------------------------------------------------------------------------------------------------------------------------------------------------------------------------------------------------------------------------------------------------------------------------------------------------------------------------------------------------------------------------------------------------------------------------------------------------------------------------------------------------------------------------------------------------------------------------------------|
| Journal:                      | <i>BMJ Open</i>                                                                                                                                                                                                                                                                                                                                                                                                                                                                                                                                                                                                                                                                                                                                                                                                                                                                                                                                                                                                                                                                                                                                                                                                                                                                                                                                                                                                                                                                                                                                                                                                                                                                                                       |
| Manuscript ID                 | bmjopen-2020-045053                                                                                                                                                                                                                                                                                                                                                                                                                                                                                                                                                                                                                                                                                                                                                                                                                                                                                                                                                                                                                                                                                                                                                                                                                                                                                                                                                                                                                                                                                                                                                                                                                                                                                                   |
| Article Type:                 | Original research                                                                                                                                                                                                                                                                                                                                                                                                                                                                                                                                                                                                                                                                                                                                                                                                                                                                                                                                                                                                                                                                                                                                                                                                                                                                                                                                                                                                                                                                                                                                                                                                                                                                                                     |
| Date Submitted by the Author: | 22-Sep-2020                                                                                                                                                                                                                                                                                                                                                                                                                                                                                                                                                                                                                                                                                                                                                                                                                                                                                                                                                                                                                                                                                                                                                                                                                                                                                                                                                                                                                                                                                                                                                                                                                                                                                                           |
| Complete List of Authors:     | <p>Wu, Chaoqun; Chinese Academy of Medical Sciences and Peking Union Medical College, National Clinical Research Center of Cardiovascular Diseases, State Key Laboratory of Cardiovascular Disease, Fuwai Hospital, National Center for Cardiovascular Diseases</p> <p>Zhang, Danwei; National Clinical Research Center for Cardiovascular Diseases, NHC Key Laboratory of Clinical Research for Cardiovascular Medications, State Key Laboratory of Cardiovascular Disease, Fuwai Hospital, Chinese Academy of Medical Sciences and Peking Union Medical College, National Center for Cardiovascular Diseases</p> <p>Bai, Xueke; National Clinical Research Center of Cardiovascular Diseases, State Key Laboratory of Cardiovascular Disease, Fuwai Hospital, National Center for Cardiovascular Diseases, Chinese Academy of Medical Sciences and Peking Union Medical College</p> <p>Zhou, Tiannan; Center for Outcomes Research and Evaluation, Yale-New Haven Health System</p> <p>Wang, Yongfei; Yale School of Medicine, Section of Cardiovascular Medicine</p> <p>Lin, Zhenqiu; Yale-New Haven Hospital, Center for Outcomes Research and Evaluation</p> <p>He, Guangda; National Clinical Research Center for Cardiovascular Diseases, NHC Key Laboratory of Clinical Research for Cardiovascular Medications, State Key Laboratory of Cardiovascular Disease, Fuwai Hospital, Chinese Academy of Medical Sciences and Peking Union Medical College, National Center for Cardiovascular Diseases</p> <p>Li, Xi; Chinese Academy of Medical Sciences &amp; Peking Union Medical College Fuwai Hospital Department of Radiology and Imaging, National Clinical Research Center of Cardiovascular Diseases</p> |
| Keywords:                     | Health informatics < BIOTECHNOLOGY & BIOINFORMATICS, Myocardial infarction < CARDIOLOGY, Quality in health care < HEALTH SERVICES ADMINISTRATION & MANAGEMENT                                                                                                                                                                                                                                                                                                                                                                                                                                                                                                                                                                                                                                                                                                                                                                                                                                                                                                                                                                                                                                                                                                                                                                                                                                                                                                                                                                                                                                                                                                                                                         |
|                               |                                                                                                                                                                                                                                                                                                                                                                                                                                                                                                                                                                                                                                                                                                                                                                                                                                                                                                                                                                                                                                                                                                                                                                                                                                                                                                                                                                                                                                                                                                                                                                                                                                                                                                                       |

1  
2  
3  
4  
5  
6  
7  
8  
9  
10  
11  
12  
13  
14  
15  
16  
17  
18  
19  
20  
21  
22  
23  
24  
25  
26  
27  
28  
29  
30  
31  
32  
33  
34  
35  
36  
37  
38  
39  
40  
41  
42  
43  
44  
45  
46  
47  
48  
49  
50  
51  
52  
53  
54  
55  
56  
57  
58  
59  
60

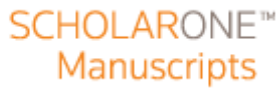

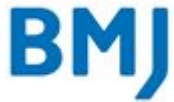

I, the Submitting Author has the right to grant and does grant on behalf of all authors of the Work (as defined in the below author licence), an exclusive licence and/or a non-exclusive licence for contributions from authors who are: i) UK Crown employees; ii) where BMJ has agreed a CC-BY licence shall apply, and/or iii) in accordance with the terms applicable for US Federal Government officers or employees acting as part of their official duties; on a worldwide, perpetual, irrevocable, royalty-free basis to BMJ Publishing Group Ltd ("BMJ") its licensees and where the relevant Journal is co-owned by BMJ to the co-owners of the Journal, to publish the Work in this journal and any other BMJ products and to exploit all rights, as set out in our [licence](#).

The Submitting Author accepts and understands that any supply made under these terms is made by BMJ to the Submitting Author unless you are acting as an employee on behalf of your employer or a postgraduate student of an affiliated institution which is paying any applicable article publishing charge ("APC") for Open Access articles. Where the Submitting Author wishes to make the Work available on an Open Access basis (and intends to pay the relevant APC), the terms of reuse of such Open Access shall be governed by a Creative Commons licence – details of these licences and which [Creative Commons](#) licence will apply to this Work are set out in our licence referred to above.

Other than as permitted in any relevant BMJ Author's Self Archiving Policies, I confirm this Work has not been accepted for publication elsewhere, is not being considered for publication elsewhere and does not duplicate material already published. I confirm all authors consent to publication of this Work and authorise the granting of this licence.



1  
2  
3  
4 **Are Medical Record Front Page Data Suitable for Risk Adjustment in**  
5  
6 **Hospital Performance Measurement: A Risk Model of In-hospital Mortality**  
7  
8  
9 **after Acute Myocardial Infarction**  
10

11 Chaoqun Wu<sup>1</sup>, Danwei Zhang<sup>1</sup>, Xueke Bai<sup>1</sup>, Tiannan Zhou<sup>2</sup>, Yongfei Wang<sup>2</sup>, Zhenqiu Lin  
12  
13  
14  
15 <sup>2</sup>, Guangda He<sup>1</sup>, Xi Li<sup>1</sup>

16  
17 for the China PEACE Collaborative Group (Appendix A and B)  
18  
19  
20  
21

22 1 National Clinical Research Center for Cardiovascular Diseases, NHC Key Laboratory of  
23  
24 Clinical Research for Cardiovascular Medications, State Key Laboratory of Cardiovascular  
25  
26 Disease, Fuwai Hospital, Chinese Academy of Medical Sciences and Peking Union Medical  
27  
28 College, National Center for Cardiovascular Diseases;  
29  
30

31  
32 2 Center for Outcomes Research and Evaluation, Yale-New Haven Health System, New  
33  
34 Haven, Connecticut, United States.  
35  
36  
37  
38

39 **Correspondence:** Dr Li Xi, National Clinical Research Center for Cardiovascular Diseases,  
40  
41 Fuwai Hospital, 167 Beilishi Road, Beijing 100037, People's Republic of China; Tel: +86 10  
42  
43 8839 6203; Fax: +86 10 8836 5201; Email: [xi.li@fwoxford.org](mailto:xi.li@fwoxford.org)  
44  
45  
46  
47  
48  
49  
50  
51

52 **Word count for the abstract:** 254  
53

54  
55 **Word count for the text of the manuscript:** 3694  
56  
57  
58  
59  
60

## ABSTRACT

### Objectives

To develop a model of in-hospital mortality using MRFP data, and assess its validity in case-mix standardization by comparison with a model developed using the complete medical record data.

### Design

A nationally representative retrospective study.

### Setting

Representative hospitals in China, covering 161 hospitals in modelling cohort and 156 hospitals in validation cohort.

### Participants

Representative patients admitted for AMI. 8370 patients in modelling cohort and 9704 patients in validation cohort.

### Primary outcome measures

In-hospital mortality, which was defined explicitly as death that occurred during hospitalization, and the hospital-level risk standardized mortality rate (RSMR)

### Results

A total of 14 variables were included in the model predicting in-hospital mortality based on MRFP data, with the AUC of 0.78 among modelling cohort and 0.79 among validation cohort. The median of absolute difference between the hospital RSMR predicted by hierarchical generalized linear models established based on MRFP data and complete medical record data, which was built as 'reference model', was 0.08% (10th and 90th percentiles: -

1  
2  
3  
4 1.8% and 1.6%). In the regression model comparing the RSMR between two models, the  
5  
6 slope and intercept of the regression equation is 0.90 and 0.007 in modelling cohort, while  
7  
8 0.85 and 0.010 in validation cohort, which indicated that the evaluation capability from two  
9  
10 models were very similar.  
11  
12

### 13 14 **Conclusions**

15  
16 The models based on MRFP data showed good discrimination and calibration capability, as  
17  
18 well as similar risk prediction effect in comparison with the model based on complete medical  
19  
20 record data, which proved that MRFP data could be suitable for risk adjustment in hospital  
21  
22 performance measurement.  
23  
24  
25  
26  
27  
28  
29  
30  
31

### 32 **KEY WORDS**

33  
34  
35 Health informatics, Myocardial infarction, Quality in health care  
36  
37  
38  
39  
40  
41  
42  
43  
44  
45  
46  
47  
48  
49  
50  
51  
52  
53  
54  
55  
56  
57  
58  
59  
60

## Strengths and limitations of this study

- The Hospital Quality Monitoring System (HQMS) in China provided a nationwide data source to assess disparities in quality of care.
- However, it is still unclear whether medical record front page (MRFP) data collected in HQMS are suitable to adjust for patient case-mix across hospitals, in the comparison of patient outcomes.
- Based on MRFP and complete medical record data from representative cohorts of patients admitted with AMI from representative hospitals, hierarchical generalized linear models (HGLMs) of in-hospital mortality was established and validated.
- Two methods were used to compare the hospital-level risk standardized mortality rate derived from two HGLMs to explore whether the model based on MRFP data had similar efficiency with that based on complete medical record data
- Although this study was based on nationally representative cohorts with model development and validation using data from different years, external validations that include more diverse hospitals will be needed in the future.

## INTRODUCTION

Equal access to high-quality health care is one of the major aims in China's recent public hospital reform<sup>1 2</sup>. To continuously improve quality of care and mitigate its disparities across regions or hospitals, sustainable assessment of hospital performance is firstly required<sup>3 4</sup>. The Ministry of Health (named as "National Health Commission" now) of China established the Hospital Quality Monitoring System (HQMS) in 2011 that currently covers over 1800 tertiary hospitals and 2300 secondary hospitals, to collect key information of all hospitalizations, including patients' diagnosis and outcomes recorded in the medical record front page (MRFP) using a standardized form (Table S1)<sup>5 6</sup>. Although the MRFP lack of detailed information on treatment process such as lab test results or medications, with structured records on diagnosis, procedure and outcome, it could be utilized as a unique nationwide data source of outcome quality assessment (i.e. in-hospital mortality).

Assessing quality of care between hospitals needs to take into account patients' different demographic and clinical characteristics of patients between hospitals, like most of the prior studies have done based on a broad array of information from complete medical record<sup>7-9</sup>. However, it is still unclear whether the MRFP data collected in HQMS are suitable for adjustment for the patient case-mix between hospitals, to achieve the goals similarly.

In China PEACE (Patient-centred Evaluative Assessment of Cardiac Events) - Retrospective study, we built a nationally representative sample of patients hospitalized for acute myocardial infarction (AMI) and extracted high-quality data from their complete medical records (including medical record front pages), which provided an ideal condition to assess disparities in quality of care,<sup>10</sup>. We aim to develop a model of in-hospital mortality

1  
2  
3  
4 using their MRFP data, then assess its validity in case-mix standardization by comparison  
5  
6 with a model developed using the complete medical record data of the same patient cohort.  
7  
8  
9

## 10 11 **METHODS**

### 12 13 **Patient and Public Involvement**

14  
15 No patient involved.  
16

### 17 18 **Study design and population**

19  
20 The design of China PEACE-Retrospective AMI study has been published previously <sup>11</sup>. In  
21  
22 brief, the study used a stratified two-stage random sampling method to select representative  
23  
24 hospitals and patients admitted for AMI nationwide during 2001, 2006, and 2011. In addition,  
25  
26 the study also included a more recent sample of patients admitted in 2015 using the same  
27  
28 random sampling process. Firstly, five regions (Eastern cities, Central and Western cities,  
29  
30 Eastern villages, Central villages, and Western villages) were used for representative hospital  
31  
32 selection by simple random sampling method. Secondly, AMI cases (diagnosed as ICD-9  
33  
34 coded 410.xx or ICD-10 coded I21.xx, or key words from discharge diagnosis) were  
35  
36 randomly selected from all patients who met the inclusion criteria in each selected hospital by  
37  
38 random sampling method. Trained personnel at the national coordinating centres abstracted  
39  
40 data from the medical records using standardized data definitions. Data abstraction quality  
41  
42 was monitored by randomly audits that ensured that the overall variable accuracy exceeded  
43  
44 98% <sup>11</sup>.  
45  
46  
47  
48  
49  
50  
51  
52  
53

54 The Ethics Committee at the National Center for Cardiovascular Diseases approved the  
55  
56 study (2012-377; 2016-769). All collaborating hospitals either accepted central ethics  
57  
58  
59  
60

1  
2  
3  
4 approval or obtained local ethics approval by their ethics committees. As a retrospective  
5  
6 study, written informed consent of patients were not required. It's our goal to share data from  
7  
8 the China PEACE studies; however, at this time, we are unable to do so.

9  
10  
11 In this study, patients from year 2011 were regarded as the modelling cohort, and patients  
12  
13 from the year 2015 were regarded as the validation cohort. Patients who transferred out to  
14  
15 another hospital were excluded since we could not get their outcomes. A total of 8370 patients  
16  
17 from 161 hospitals (96 secondary hospitals and 65 tertiary hospitals) were included as  
18  
19 modelling cohort, and another 9704 patients from 156 hospitals (93 secondary hospitals and  
20  
21 63 tertiary hospitals) were included as validation cohort. In addition, if a hospital had less  
22  
23 than 10 eligible patients per year, it would be further excluded from the hospital-level  
24  
25 analysis. 8269 patients (137 hospitals, 73 secondary hospitals and 64 tertiary hospitals) from  
26  
27 modelling cohort and 9583 patients (132 hospitals, 71 secondary hospitals and 61 tertiary  
28  
29 hospitals) from validation cohort were included in the further analysis (Figure S1).

### 30 31 32 33 34 35 36 37 **Statistical analysis**

38  
39  
40 According to study aim, we need to develop and evaluate a model predicting in-hospital  
41  
42 outcome at patient level based on MRFP data from modelling cohort firstly. If the model  
43  
44 performed well, then another model used to evaluate hospital quality of care would be built  
45  
46 based on prior model. The validation cohort was used to conduct external evaluation of  
47  
48 models. Hospital level model would be built based on complete medical record data, which  
49  
50 could be considered as 'the best reference'. By comparing the difference and association of  
51  
52 the indicators evaluated by the MRFP model and the complete medical record model, we  
53  
54 could explore whether the model based on MRFP data had similar efficiency with that based  
55  
56  
57  
58  
59  
60

1  
2  
3  
4 on complete medical record data. The analysis roadmap was demonstrated in Figure S2.  
5

### 6 **Candidate predictors and outcome** 7

8  
9 Patient characteristics were selected as candidate predictors, according to previous AMI  
10  
11 predictive models such as GRACE, TIMI, and ACTION-GWTG<sup>7-9 12-17</sup>. For the model based  
12  
13 on MRFP data, the candidate predictors included demographic characteristics (gender, age,  
14  
15 medical insurance status, ethnicity, marital status), admission department, diagnosis at  
16  
17 admission (cardiac arrest) and at discharge (acute ST-segment elevation myocardial infarction  
18  
19 [STEMI], infarction position, hypertension, diabetes, dyslipidaemia, cardiogenic shock, heart  
20  
21 failure, stroke, renal failure), which was available from MRFP data. For the model based on  
22  
23 complete medical record, we additionally include patients' symptoms, vital signs and lab test  
24  
25 results at admission.  
26  
27  
28  
29  
30  
31

32 In-hospital mortality, as the outcome variable in the models, was defined explicitly as  
33  
34 death that occurred during hospitalization, which was recorded both on the MRFP and  
35  
36 elsewhere such as discharge record. For the accuracy of analysis, we used complete medical  
37  
38 record as data source. We did not include patients who withdraw treatment as outcome since  
39  
40 we could not get "withdraw" information from MRFP data, though plenty of these patients  
41  
42 might die soon after giving up treatment.  
43  
44  
45  
46  
47

### 48 **Patient-level model development and evaluation** 49

50 A logistic regression model was built based on MRFP data from the modelling cohort. Area  
51  
52 under receiver operating characteristic curve (AUC) and observed rates in deciles determined  
53  
54 by model estimating value were used to evaluate the discrimination. Slope and intercept of  
55  
56 regression equation between the observed and the predicted mortality was used to evaluate the  
57  
58  
59  
60



1  
2  
3  
4 calibration ability. To assess the overfitting of the model, we used the coefficients estimated  
5  
6 from the logistic model to predict the probability of mortality in the validation cohort, by  
7  
8 multiplying coefficients by the observed risk factors variables and summing over for each  
9  
10 subject. Then another logistic regression model was built, in which the dependent variable  
11  
12 was observed mortality and independent variables were the predicted mortality generated as  
13  
14 above. The slope different from 1 and the intercept different from 0 indicated overfitting.  
15  
16  
17  
18

19 Furthermore, we re-estimated the logistic regression model in the validation cohort used  
20  
21 selected predictors above. If the estimated coefficients of new model were similar to prior, the  
22  
23 selected predictors were considered to be stable. Discrimination and calibration were also  
24  
25 evaluated in the re-established logistic model.  
26  
27  
28

29 Complete medical record model was developed and validated based on the data from  
30  
31 complete medical records, using the same method mentioned above.  
32  
33  
34

### 35 **Hospital-level model development and comparison**

36  
37 Hierarchical generalized linear models (HGLM) were established among modelling and  
38  
39 validation cohort separately, using above selected covariates and hospitals as random effects.  
40  
41 HGLM considered the patient clustering in hospitals, and could be used to distinguish the  
42  
43 differences of outcome within and between hospitals.  
44  
45  
46  
47

48 Hospital-level risk standardized mortality rate (RSMR) was used as an indicator to  
49  
50 evaluating hospital quality of care in this study. The RSMR of each hospital could be  
51  
52 calculated from HGLM as the ratio of predicted and expected mortality of the hospital,  
53  
54 multiplied by the unadjusted rate of all hospitals. The expected mortality is the mortality rate  
55  
56 of the hospital if patients in each hospital were treated in a “reference” hospital; the predicted  
57  
58  
59  
60

1  
2  
3  
4 mortality accounted for the characteristics of a hospital (the hospital-level random effects of  
5  
6 the model) <sup>8 18</sup>.

7  
8  
9 We use two methods to compare the RSMR derived from the HGLMs based on MRFP  
10  
11 and the complete medical record data. (1) Absolute differences of RSMR from two models  
12  
13 were calculated, and the distribution of differences was described using mean, median, and  
14  
15 maximum. (2) A linear regression model was built, with RSMR from the complete medical  
16  
17 record data as the dependent variable and RSMR from the MRFP data as the independent  
18  
19 variable. The slope of the model approaching 1 and the intercept approaching 0 indicated that  
20  
21 the predicted probabilities from the two models were very similar. All above calculation and  
22  
23 comparison would be conducted among the modelling and validation cohort separately.  
24  
25  
26  
27  
28

29  
30 All statistical inferences were performed on two-tailed test, and  $p < 0.05$  was considered  
31  
32 statistically significant. The statistical software used is SAS 9.4 (SAS Institute Inc., Cary,  
33  
34 North Carolina).  
35  
36  
37  
38  
39

## 40 **RESULTS**

### 41 **Study Population and Characteristics**

42  
43 In the modelling cohort, the average age was  $65.4 \pm 12.8$  years, and 2519 (30.1%) patients  
44  
45 were female. About 1/2 of the patients were admitted to cardiovascular department at  
46  
47 admission. 65.8% were diagnosed with STEMI, while 46.5%, 19.7% and 10.0% had  
48  
49 comorbidities of hypertension, diabetes and dyslipidaemia, respectively. Cardiac shock  
50  
51 occurred in 4.8% of the patients, and 0.1% of patients had cardiac arrest before admission  
52  
53 (Table 1). A total of 621 patients died during hospitalization, accounting for 7.4% of the  
54  
55  
56  
57  
58  
59  
60

1  
2  
3  
4 modelling cohort.

5  
6 Compared with modelling cohort, patients in the validation cohort had a higher  
7  
8 proportion of patients with medical insurance and admission in cardiovascular departments  
9  
10 (p<0.001). Less proportion (49.0%) of patients were diagnosed with STEMI (p<0.001), while  
11  
12 a greater proportion of patients had hypertension, diabetes, dyslipidaemia, heart failure and  
13  
14 renal failure (p<0.05) (Table 1). 689 patients died during hospitalization, accounting for 7.1%  
15  
16 of the validation cohort, which was not significantly different from the modelling cohort  
17  
18 (p=0.41).  
19  
20  
21  
22  
23

#### 24 **Development and validation of patient-level model**

25  
26 A total of 14 risk factors were included in the MRFP model based on modelling cohort  
27  
28 (Figure 1a). Model discrimination was good, with the AUC of 0.78, and observed mortality  
29  
30 rate ranging from 0.83% in the lowest decile of the predicted mortality rate to 26.88% in the  
31  
32 highest decile. The slope of the calibration curve was 0.91 and the intercept was -0.007,  
33  
34 which showed the good calibration ability of this model (Table 2). The overfitting statistics  
35  
36 were within an acceptable range (slope=1.01, intercept=-0.07), indicating that no overfitting  
37  
38 exist.  
39  
40  
41  
42  
43

44  
45 The predictors included above were applied to the validation cohort to reconstruct the  
46  
47 model, which showed that the effect direction and size were still similar (Figure 1a). In the  
48  
49 validation cohort, the AUC was 0.79, with observed mortality rate ranging from 1.00% to  
50  
51 29.72%, and the slope and intercept of the calibration curve was 0.93 and 0.005 (Table 2).  
52  
53  
54

55  
56 Using the same method, a complete medical record model was built, in which a total of  
57  
58 13 risk factors were included (Figure 1b). The AUC of the model was 0.79, and observed  
59  
60

1  
2  
3  
4 mortality rate ranged from 0.51% in the lowest decile to 27.96% in the highest decile. The  
5  
6 slope of the calibration curve was 0.94 and the intercept was 0.004 (Table 2). Similar with the  
7  
8 MRFP model, the complete medical record model had good discrimination and calibration, as  
9  
10 well as relatively stable coefficients when validated among the validation cohort (Figure 1b  
11  
12 and Table2).  
13  
14  
15

### 16 **Development and comparison of hospital-level model**

17  
18  
19 8269 patients (137 hospitals, 73 secondary hospitals and 64 tertiary hospitals) from modelling  
20  
21 cohort and 9583 patients (132 hospitals, 71 secondary hospitals and 61 tertiary hospitals) from  
22  
23 validation cohort were included in estimating the hospital-level HGLMs.  
24  
25

26  
27 In the modelling cohort, the median hospital-level RSMR was 7.4% (IQR: 5.2% -  
28  
29 10.1%). The median of absolute difference between the RSMR predicted by the complete  
30  
31 medical record data and MRFP data was 0.08% (IQR: -0.67% - 0.53%), and the 10th and 90th  
32  
33 percentiles were -1.8% and 1.6%, with no statistical significance (p=0.499). In the validation  
34  
35 cohort, the median RSMR was 6.4% (IQR: 4.5% - 10.4%), and the median of absolute  
36  
37 difference was 0.05%, with 10th and 90th percentiles of -2.8% and 1.9% (Figure S3). For the  
38  
39 regression model comparing the RSMR between the MRFP data and complete medical record  
40  
41 data, the slope (intercept) was 0.90 (0.007) in the modelling cohort, while 0.85 (0.010) in the  
42  
43 validation cohort (Figure 3). The correlations among secondary hospitals were better than  
44  
45 among tertiary hospitals.  
46  
47  
48  
49  
50  
51  
52  
53  
54

## 55 **DISCUSSION**

56  
57  
58 This study developed patient and hospital level MRFP models of in-hospital mortality of  
59  
60

1  
2  
3  
4 AMI, and took into account the patient case-mix in the hospital-level disparity analysis. These  
5  
6 models based on MRFP data showed good discrimination and calibration capability, as well  
7  
8 as similar risk prediction effect in comparison with the model based on complete medical  
9  
10 record data, which proved that MRFP data could be suitable for risk adjustment in hospital  
11  
12 performance measurement in China.  
13  
14  
15

16  
17 To our knowledge, the current study extended literatures in several ways. First, this is the  
18  
19 first in-hospital mortality risk model based only on MRFP data in China. Currently in China,  
20  
21 it is still difficult to obtain detailed complete medical records data nationwide for quality  
22  
23 monitoring, due to the fragmentation in development and deployment of Hospital Information  
24  
25 Systems and Electronic Medical Record Systems. In the United States which faces similar  
26  
27 challenges, several risk models have been developed using concise administrative claims data,  
28  
29 and successfully applied as substitute of complete medical record models<sup>8 9</sup>. The key value of  
30  
31 this model is to demonstrate how MRFP data from HQMS can serve as a solution for national  
32  
33 quality assessment, rather than to identify coefficients of specific risk characteristics.  
34  
35  
36  
37  
38  
39

40  
41 Second, the methods we chosen for model development specifically to standardize the  
42  
43 hospital-level case-mix. We firstly selected an array of patient characteristics that influence  
44  
45 their risk profile significantly using backward logistic regression, and confirmed the stability  
46  
47 of this array in the validation cohort. Then we established a HGLM using these  
48  
49 characteristics, because the HGLM takes into account the correlation of patients admitted in  
50  
51 the same hospital to avoided underestimating the standard error of other risk factors,<sup>18 19</sup>  
52  
53 which fits the nature that patients clustered within individual hospitals, and has been well-  
54  
55 tested in previous studies on hospital-level comparisons<sup>7-9</sup>.  
56  
57  
58  
59  
60

1  
2  
3  
4 Third, model based on MRFP data was robustly validated by not only repeating in  
5  
6 validation cohorts, but more importantly comparing with which based on complete medical  
7  
8 records data. Even though there is no real golden standard of risk standardization, medical  
9  
10 record data enable the most complete characteristics of patients' demographic and clinical  
11  
12 profile. The China PEACE Retrospective study provided a unique opportunity to compare the  
13  
14 MRFP model against the complete medical record model, because scanning copies of  
15  
16 sampled medical records were collected, and detailed information on patient characteristics  
17  
18 had been centrally extracted from the front page and all other parts of medical records.  
19  
20  
21  
22  
23

24 The feasibility of MRFP model has significant policy implications for China, as the  
25  
26 government emphasized the importance of hospital performance monitoring<sup>20</sup>. Even though  
27  
28 research on quality of care has been growing fast during the past decade, China needs a  
29  
30 nationwide health information technology systems covering all healthcare providers, in which  
31  
32 the data collection and analysis could be more timely, accurate and sustainable<sup>3 4</sup>. Since the  
33  
34 HQMS was established, it has increasingly covered over 1800 (73%) tertiary hospitals and  
35  
36 2300 (26%) secondary hospitals, but the utilization of data remains limited<sup>3</sup>. Our study  
37  
38 showed how this existing platform with concise MRFP data can serve as a base for national  
39  
40 hospital performance measurement, similar to the United States Centers for Medicare &  
41  
42 Medicaid Services' use of administrative claims data<sup>19 20</sup>. Moreover, some challenges should  
43  
44 to be addressed. First, the quality of MRFP data across hospitals, particularly the  
45  
46 completeness of comorbidity documentation and accuracy of diagnosis coding in diagnosis,  
47  
48 needs to be improved<sup>21</sup>. Second, for chronic conditions with low in-hospital mortality rates,  
49  
50 data on post-discharge outcomes (e.g. 30-day readmission rates) data need to be obtained  
51  
52  
53  
54  
55  
56  
57  
58  
59  
60

1  
2  
3  
4 from clinical registries, insurance claims and other sources.  
5

### 6 **Limitations of the study**

7  
8  
9 There are some limitations in this study. First, weaker correlation in tertiary hospitals between  
10  
11 RSMRs generated from the two risk models indicated a relatively poorer performance of  
12  
13 current MRFP model applied in tertiary hospitals. However, this could be improved if the  
14  
15 model development and disparity assessment were conducted within subgroups of hospitals  
16  
17 separately. Second, although this study was based on nationally representative cohorts with  
18  
19 model development and validation using data from different years, external validations that  
20  
21 include more diverse hospitals will be needed in the future.  
22  
23  
24  
25

### 26 **Conclusion**

27  
28  
29 In conclusion, the MRFP model of in-hospital mortality supported that HQMS data could  
30  
31 act as reasonable substitute for complete medical record data in risk adjustment between  
32  
33 hospitals across the nation. The lessons from AMI treatment could serve as a model to  
34  
35 nationwide assessment on quality of care in other clinical fields.  
36  
37  
38  
39  
40  
41  
42

### 43 **ACKNOWLEDGMENTS**

44  
45 We appreciate the multiple contributions made by study teams at National Clinical Research  
46  
47 Center for Cardiovascular Diseases and Yale-New Haven Hospital Center for Outcomes  
48  
49 Research and Evaluation in study design and operations, particularly the data collection by Yi  
50  
51 Pi, Jiamin Liu, Wuhanbilige Hundei, Haibo Zhang, Lihua Zhang, Wenchi Guan, Xiaofang  
52  
53 Yan, Yuan Yu, Xiqian Huo, Xin Zheng, and Yuanlin Guo. We appreciate the editing by Aoxi  
54  
55 Tian and Xingyi Zhang. We are grateful for the support provided by the Chinese government.  
56  
57  
58  
59  
60

## Funding

This work was supported by the National Key Research and Development Program [2017YFC1310803] from the Ministry of Science and Technology of China, the Chinese Academy of Medical Sciences Innovation Fund for Medical Science [2017-I2M-2-002] the 111 Project from the Ministry of Education of China [B16005], and the National Key Technology R&D Program [2015BAI12B01] from the Ministry of Science and Technology of China. The sponsors had no role in the conduct of the study; in the collection, management, analysis, and interpretation of the data; or in the preparation or approval of the manuscript.

## Declaration of conflicting interests

None declared.

## Author contributions

XL contributed to the conception or design of the work. CW, DZ and XB contributed to the acquisition of data for the work. CW and XB contributed to the analysis of data for the work. CW, DZ, TZ and XL contributed to the interpretation of data for the work. CW and DZ drafted the manuscript. TZ, YW, ZL, GH and XL critically revised the manuscript. All gave final approval and agree to be accountable for all aspects of work ensuring integrity and accuracy.

## REFERENCES

1. General Office of the State Council. Opinions of the General Office of the State Council on Strengthening the Performance Evaluation of Public Hospitals. In: GeneralOfficeoftheStateCouncilofthePeople'sRepublicofChina, ed., 2019.
2. National Health Commission. Measures for medical quality management. Secondary Measures for medical quality management 2016. <http://www.nhc.gov.cn/fzs/s3576/201610/ae125f28eef24ca7aac57c8ec530c6d2.shtml>.



- 1  
2  
3 3. Li X, Krumholz HM. What does it take to improve nationwide healthcare quality in China?  
4 *BMJ Quality & Safety* 2019;bmjqs-2019-009839.
- 5  
6 4. Jiang L, Krumholz HM, Li X, et al. Achieving best outcomes for patients with  
7 cardiovascular disease in China by enhancing the quality of medical care and  
8 establishing a learning health-care system. *Lancet* 2015;**386**(10002):1493-505.
- 9  
10 5. Department of Medical Management of the Ministry of Health. Notice on the pilot project  
11 of direct reporting of medical service supervision information network, 2011.
- 12  
13 6. Bureau of Medical Administration of National Health Commission. Hospital Quality  
14 Monitoring System. Secondary Hospital Quality Monitoring System.  
15 <https://www.hqms.org.cn/login.jsp>.
- 16  
17 7. Granger CB, Goldberg RJ, Dabbous O, et al. Predictors of hospital mortality in the global  
18 registry of acute coronary events. *Archives of internal medicine* 2003;**163**(19):2345-  
19 53.
- 20  
21 8. Krumholz HM, Wang Y, Mattera JA, et al. An administrative claims model suitable for  
22 profiling hospital performance based on 30-day mortality rates among patients with an  
23 acute myocardial infarction. *Circulation* 2006;**113**(13):1683-92.
- 24  
25 9. Krumholz HM, Chen J, Wang Y, et al. Comparing AMI mortality among hospitals in  
26 patients 65 years of age and older: evaluating methods of risk adjustment. *Circulation*  
27 1999;**99**(23):2986-92.
- 28  
29 10. Li X, Murugiah K, Li J, et al. Urban–rural comparisons in Hospital Admission,  
30 Treatments, and Outcomes for ST-Segment–Elevation Myocardial Infarction in China  
31 from 2001 to 2011. *Circ Cardiovasc Qual Outcomes* 2017;**10**(11): e003905(11).
- 32  
33 11. Dharmarajan K, Li J, Li X, et al. The China Patient-Centered Evaluative Assessment of  
34 Cardiac Events (China PEACE) retrospective study of acute myocardial infarction:  
35 study design. *Circulation Cardiovascular quality and outcomes* 2013;**6**(6):732-40.
- 36  
37 12. Antman EM, Cohen M, Bernink PJ, et al. The TIMI risk score for unstable angina/non-ST  
38 elevation MI: A method for prognostication and therapeutic decision making. *Jama*  
39 2000;**284**(7):835-42.
- 40  
41 13. Morrow DA, Antman EM, Charlesworth A, et al. TIMI risk score for ST-elevation  
42 myocardial infarction: A convenient, bedside, clinical score for risk assessment at  
43 presentation: An intravenous nPA for treatment of infarcting myocardium early II trial  
44 substudy. *Circulation* 2000;**102**(17):2031-7.
- 45  
46 14. Chin CT, Chen AY, Wang TY, et al. Risk adjustment for in-hospital mortality of  
47 contemporary patients with acute myocardial infarction: the acute coronary treatment  
48 and intervention outcomes network (ACTION) registry-get with the guidelines  
49 (GWTG) acute myocardial infarction mortality model and risk score. *Am Heart J*  
50 2011;**161**(1):113-22.e2.
- 51  
52 15. Morrow DA, Antman EM, Giugliano RP, et al. A simple risk index for rapid initial triage  
53 of patients with ST-elevation myocardial infarction: an InTIME II substudy. *Lancet*  
54 (*London, England*) 2001;**358**(9293):1571-5.
- 55  
56 16. Lee KL, Woodlief LH, Topol EJ, et al. Predictors of 30-day mortality in the era of  
57 reperfusion for acute myocardial infarction. Results from an international trial of  
58 41,021 patients. GUSTO-I Investigators. *Circulation* 1995;**91**(6):1659-68.
- 59  
60 17. Normand ST, Glickman ME, Sharma RG, et al. Using admission characteristics to predict

- 1  
2  
3 short-term mortality from myocardial infarction in elderly patients. Results from the  
4 Cooperative Cardiovascular Project. *JAMA* 1996;**275**(17):1322-28.  
5  
6 18. Shahian DM, Torchiana DF, Shemin RJ, et al. Massachusetts cardiac surgery report card:  
7 implications of statistical methodology. *Ann Thorac Surg* 2005;**80**(6):2106-13.  
8  
9 19. Austin PC, Tu JV, Alter DA. Comparing hierarchical modeling with traditional logistic  
10 regression analysis among patients hospitalized with acute myocardial infarction:  
11 should we be analyzing cardiovascular outcomes data differently? *Am Heart J*  
12 2003;**145**(1):27-35.  
13  
14 20. Xinhua News Agency. Interpretation on "the guiding opinions on the establishment of  
15 modern hospital management system" by the head of the Medical Reform Office of  
16 the State Council. Secondary Interpretation on "the guiding opinions on the  
17 establishment of modern hospital management system" by the head of the Medical  
18 Reform Office of the State Council Jul 26 2017. [http://www.gov.cn/xinwen/2017-  
19 07/26/content\\_5213541.htm](http://www.gov.cn/xinwen/2017-07/26/content_5213541.htm).  
20  
21 21. Wang Y. The challenge and solution for the front page of inpatient medical record based  
22 on DRGs. *Chinese Journal of Hospital Administration* 2015;**31**(11):831-33.  
23  
24  
25  
26  
27  
28  
29  
30  
31  
32  
33  
34  
35  
36  
37  
38  
39  
40  
41  
42  
43  
44  
45  
46  
47  
48  
49  
50  
51  
52  
53  
54  
55  
56  
57  
58  
59  
60

1  
2  
3  
4 **TABLES**  
5

6 **Table 1. Patients' characteristics from MRFP data and in-hospital mortality in modelling**  
7  
8 **cohort and validation cohort.**  
9

|                                           | <b>Modelling Cohort</b> | <b>Validation Cohort</b> |                |
|-------------------------------------------|-------------------------|--------------------------|----------------|
|                                           | <b>(Year 2011)</b>      | <b>(Year 2015)</b>       | <b>p value</b> |
|                                           | <b>N=8370</b>           | <b>N=9704</b>            |                |
| <b>In-hospital mortality</b>              | 621 (7.4)               | 687 (7.1)                | 0.3793         |
| <b>Female</b>                             | 2519 (30.1)             | 3121 (32.2)              | 0.0028         |
| <b>Age, mean(SD)</b>                      | 65.4 (12.8)             | 65.9(12.7)               | 0.0081         |
| <40                                       | 195 (2.3)               | 213 (2.2)                | <0.0001        |
| 40-49                                     | 910 (10.9)              | 891 (9.2)                |                |
| 50-59                                     | 1600 (19.1)             | 1816 (18.7)              |                |
| 60-69                                     | 2090 (25.0)             | 2674 (27.6)              |                |
| 70-79                                     | 2431 (29.0)             | 2590 (26.7)              |                |
| ≥80                                       | 1144 (13.7)             | 1520 (15.7)              |                |
| <b>Han</b>                                | 7701 (92.0)             | 9285 (95.7)              | <0.0001        |
| <b>Married</b>                            | 7460 (89.1)             | 8740 (90.1)              | 0.0391         |
| <b>Having medical insurance</b>           | 5126 (61.2)             | 7507 (77.4)              | <0.0001        |
| <b>Admission at cardiology department</b> | 4087 (48.8)             | 6532 (67.3)              | <0.0001        |
| <b>Admission Diagnosis</b>                |                         |                          |                |
| Cardiac arrest                            | 6 (0.1)                 | 18 (0.2)                 | 0.0362         |
| <b>Discharge Diagnosis</b>                |                         |                          |                |

|                                    |             |             |         |
|------------------------------------|-------------|-------------|---------|
| STEMI                              | 5509 (65.8) | 4753 (49.0) | <0.0001 |
| Acute extensive anterior MI        | 967 (11.6)  | 769 (7.9)   | <0.0001 |
| Acute anterior MI                  | 1504 (18.0) | 1310 (13.5) | <0.0001 |
| Acute anterior intermural MI       | 587 (7.0)   | 408 (4.2)   | <0.0001 |
| Acute inferior MI                  | 2558 (30.6) | 2214 (22.8) | <0.0001 |
| Acute lateral MI                   | 359 (4.3)   | 311 (3.2)   | 0.0001  |
| Acute posterior MI                 | 699 (8.4)   | 502 (5.2)   | <0.0001 |
| Acute right ventricular infarction | 615 (7.3)   | 418 (4.3)   | <0.0001 |
| Hypertension                       | 3894 (46.5) | 5080 (52.3) | <0.0001 |
| Diabetes mellitus                  | 1650 (19.7) | 2345 (24.2) | <0.0001 |
| Dyslipidemia                       | 836 (10.0)  | 1434 (14.8) | <0.0001 |
| Cardiac shock                      | 403 (4.8)   | 510 (5.3)   | 0.1773  |
| Heart failure                      | 2853 (34.1) | 3793 (39.1) | <0.0001 |
| Stroke                             | 655 (7.8)   | 1389 (14.3) | <0.0001 |
| Renal failure                      | 259 (3.1)   | 684 (7.0)   | <0.0001 |

\*MI: myocardial infarction; STEMI: ST-segment elevation myocardial infarction

**Table 2. Performance of the MRFP model and the complete medical record model**

| Model                                | N    | Discrimination       |                                                          | Calibration                            |
|--------------------------------------|------|----------------------|----------------------------------------------------------|----------------------------------------|
|                                      |      | Area under ROC curve | Predictive Ability* (mean rate of lowest/highest decile) | Calibration Indices (slope, intercept) |
| <b>MRFP model</b>                    |      |                      |                                                          |                                        |
| Year 2011(modelling cohort)          | 8370 | 0.776                | 0.83%-26.88%                                             | (0.909,0.007)                          |
| Year 2015(validation cohort)         | 9704 | 0.794                | 1.00%-29.72%                                             | (0.933,0.005)                          |
| <b>Complete medical record model</b> |      |                      |                                                          |                                        |
| Year 2011(modelling cohort)          | 8370 | 0.790                | 0.51%-27.96%                                             | (0.940,0.004)                          |
| Year 2015(validation cohort)         | 9704 | 0.798                | 0.92%-28.69%                                             | (0.927,0.005)                          |

\*observed rates in deciles determined by estimated model

ROC: receiver operating characteristic; MRFP: medical record front page.

## FIGURE LEGENDS

**Figure 1. Odds ratios of MRFP model and complete medical record model based on modelling and validation cohorts.**

(a) MRFP model (b) Complete medical record model

MRFP: medical record front page.

**Figure 2. Receiver operating characteristic (ROC) curve of MRFP model and complete medical record model based on modelling and validation cohorts.**

MRFP: medical record front page.

**Figure 3. Correlation of risk standardized mortality rate estimated by MRFP model and complete medical record model.**

(a) Modelling cohort (b) Validation cohort

MRFP: medical record front page.

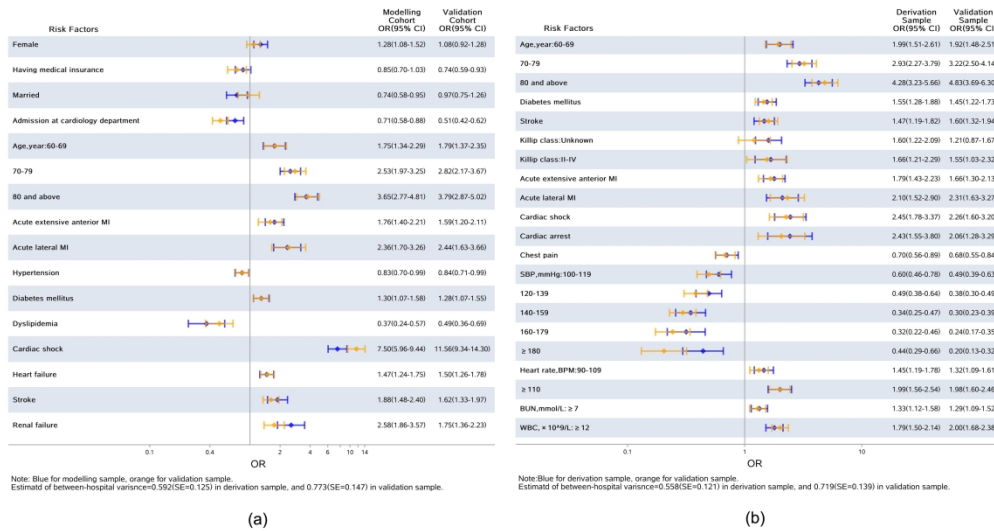

**Figure 1. Odds ratios of MRFP model and complete medical record model based on modelling and validation cohorts. (a) MRFP model (b) Complete medical record model MRFP: medical record front page**

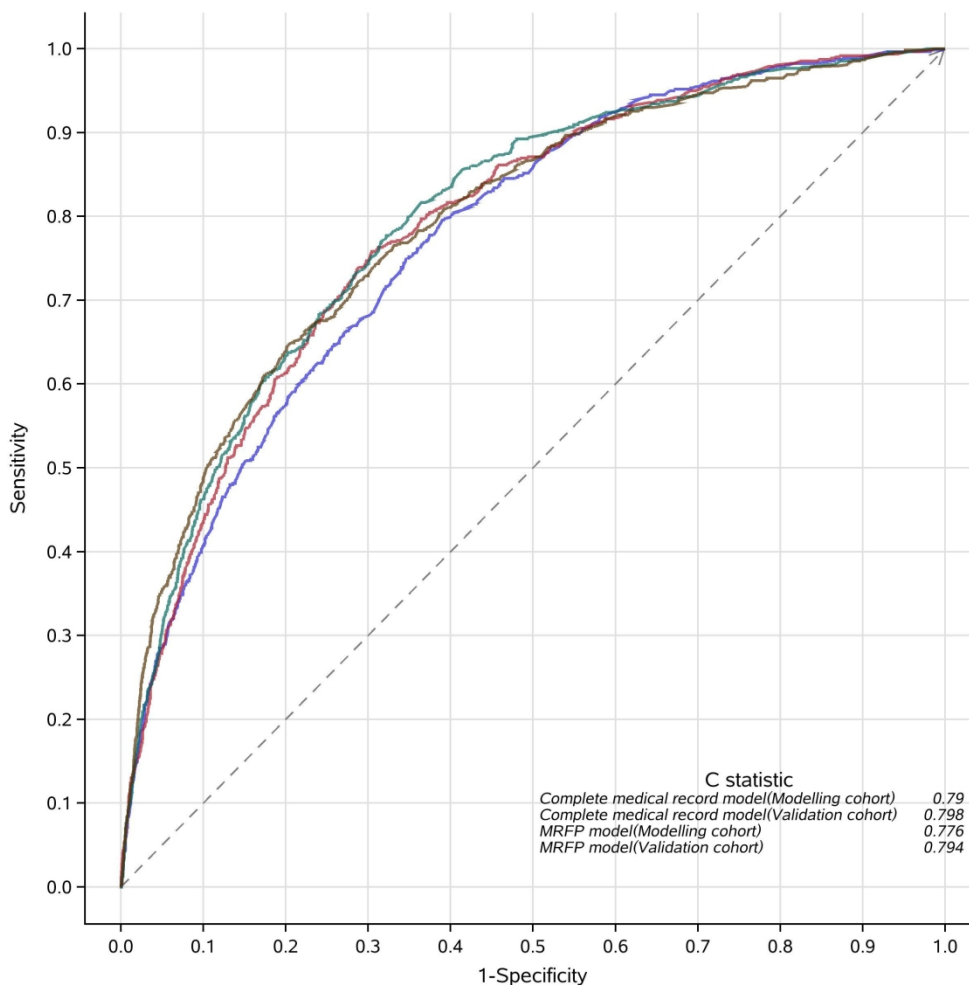

**Figure 2. Receiver operating characteristic (ROC) curve of MRFP model and complete medical record model based on modelling and validation cohorts. MRFP: medical record front page.**

207x208mm (300 x 300 DPI)



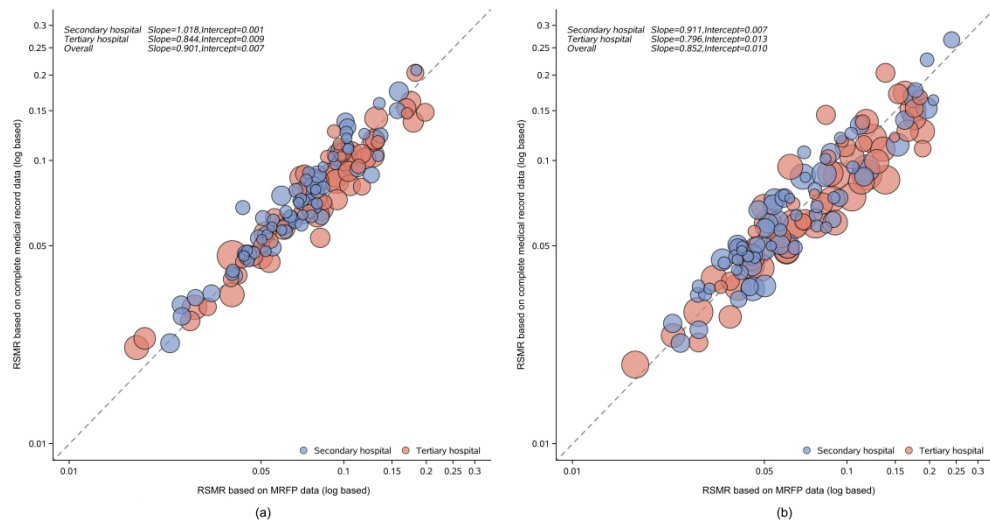

**Figure 3. Correlation of risk standardized mortality rate estimated by MRFP model and complete medical record model. (a) Modelling cohort (b) Validation cohort MRFP: medical record front page.**

1  
2  
3  
4  
5  
6  
7  
8  
9  
10  
11  
12  
13  
14  
15  
16  
17  
18  
19  
20  
21  
22  
23  
24  
25  
26  
27  
28  
29  
30  
31  
32  
33  
34  
35  
36  
37  
38  
39  
40  
41  
42  
43  
44  
45  
46  
47  
48  
49  
50  
51  
52  
53  
54  
55  
56  
57  
58  
59  
60

**Supplementary materials**

For peer review only

Figure S1. Flowchart of patients' exclusion

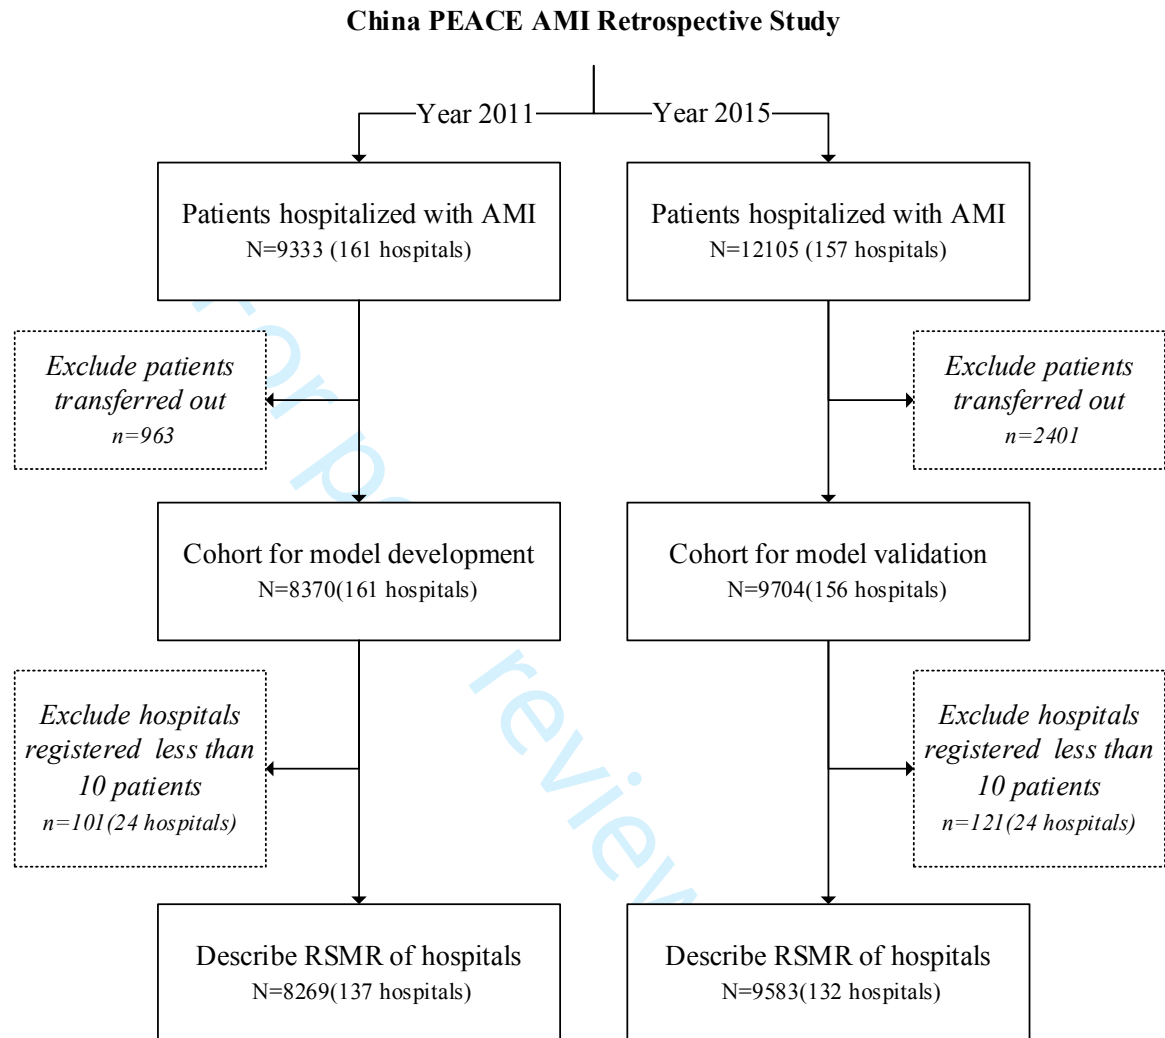

RSMR: risk standardized mortality rate

Figure S2. Analysis roadmap

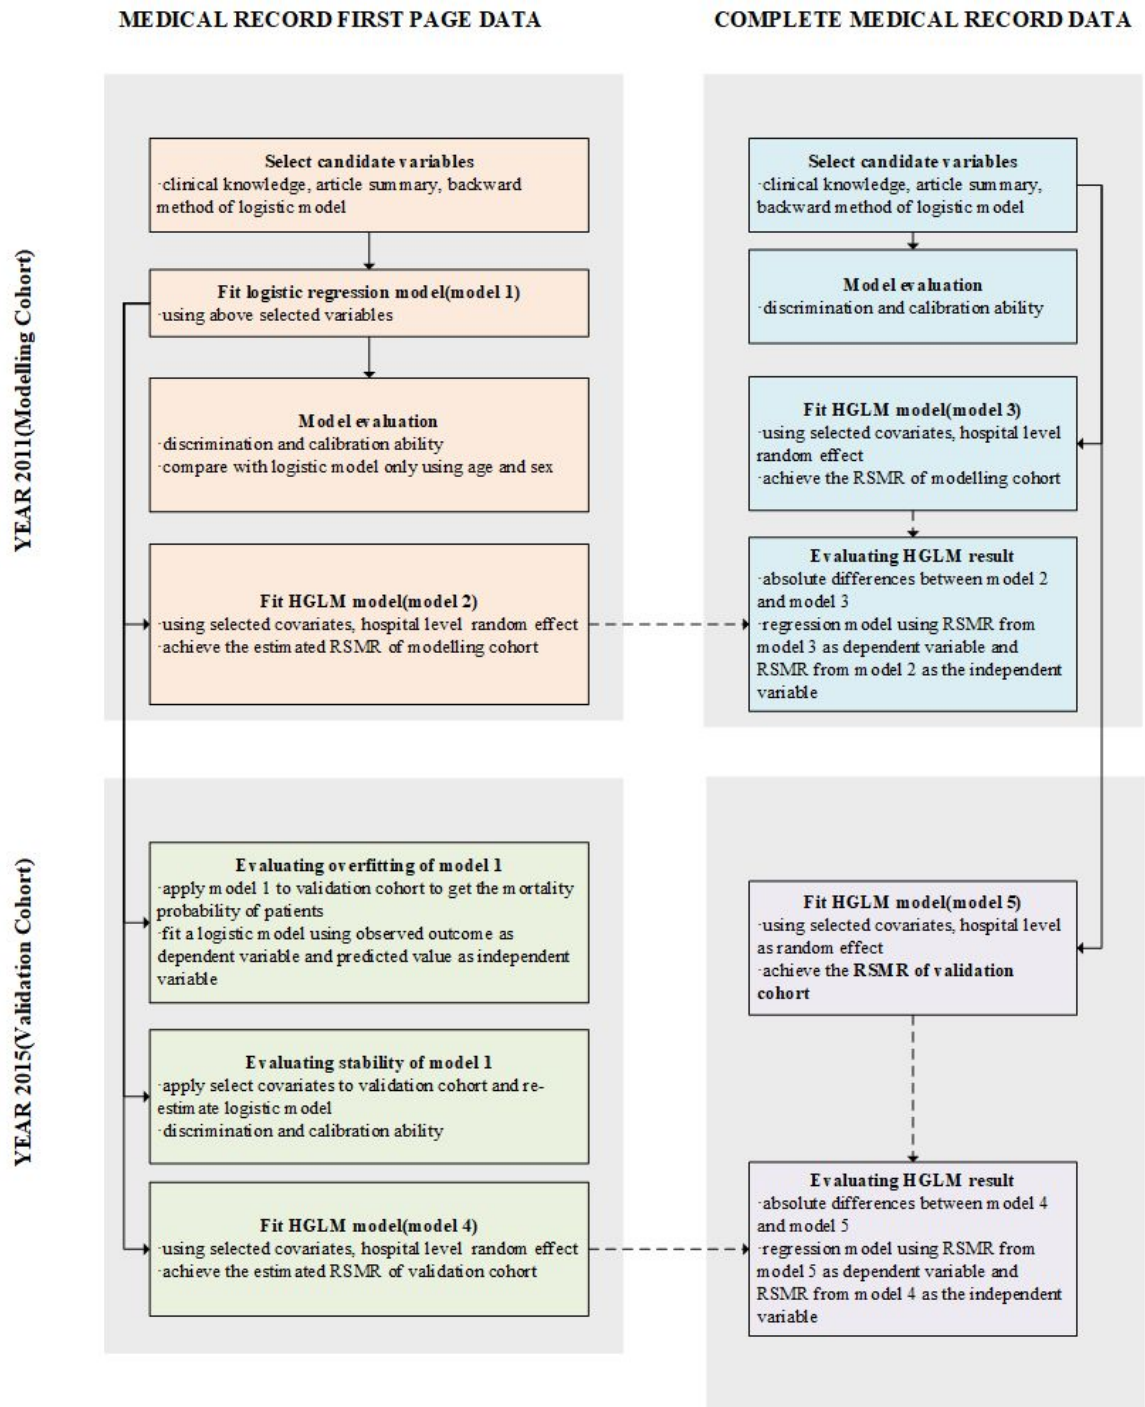

1  
2  
3  
4 **Figure S3. Distribution of risk standardized mortality rate of study hospitals**  
5  
6  
7 **estimated by MRFP model. (a) Modelling cohort (b) Validation cohort**

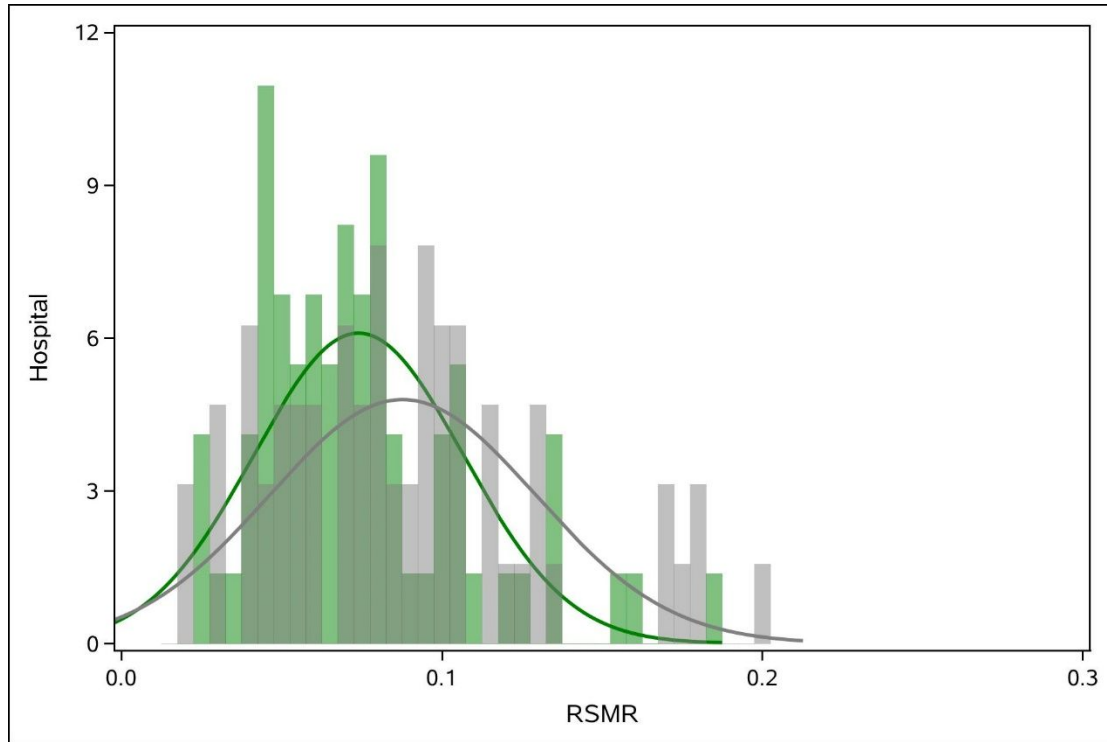

(a)

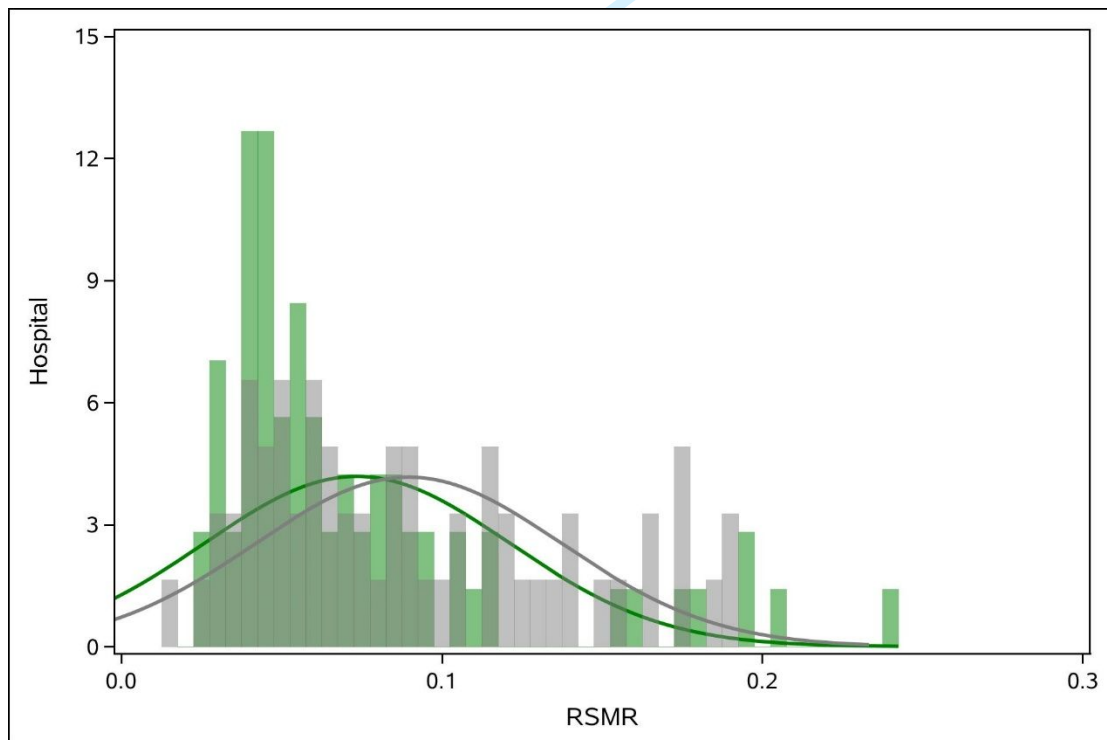

(b)

**Table S1. Data elements required in the HQMS system**

| No. | Data element                               | Field name | Data type  | Length | Required | Remarks             |
|-----|--------------------------------------------|------------|------------|--------|----------|---------------------|
| 1   | Hospital ID                                | P900       | Character  | 22     | Yes      |                     |
| 2   | Hospital name                              | P6891      | Character  | 80     | Yes      |                     |
| 3   | Medical Insurance Number                   | P686       | Character  | 50     |          |                     |
| 4   | Health-card number                         | P800       | Character  | 50     |          |                     |
| 5   | Method of healthcare payment               | P1         | Character  | 1      | Yes      |                     |
| 6   | Admission times                            | P2         | Number     | 3      | Yes      |                     |
| 7   | Medical record number                      | P3         | Character  | 20     | Yes      |                     |
| 8   | Name                                       | P4         | Character  | 40     |          |                     |
| 9   | Gender                                     | P5         | Character  | 1      | Yes      |                     |
| 10  | Birth date                                 | P6         | Date       |        |          | yyyy-mm-dd          |
| 11  | Age                                        | P7         | Number     | 3      |          | Unit (year)         |
| 12  | Marital status                             | P8         | Character  | 1      | Yes      |                     |
| 13  | Occupation                                 | P9         | Character  | 2      |          |                     |
| 14  | Birthplace (province)                      | P101       | Character  | 30     |          |                     |
| 15  | Birthplace (city)                          | P102       | Character  | 30     |          |                     |
| 16  | Birthplace (county)                        | P103       | Character  | 30     |          |                     |
| 17  | Ethnicity                                  | P11        | Character  | 20     |          |                     |
| 18  | Nationality                                | P12        | Character  | 40     |          |                     |
| 19  | Social ID                                  | P13        | Character  | 18     |          |                     |
| 20  | Residence                                  | P801       | Character  | 200    |          |                     |
| 21  | Residential phone number                   | P802       | Character  | 40     |          |                     |
| 22  | Postcode of residence                      | P803       | Character  | 6      |          |                     |
| 23  | Name and address of employer               | P14        | Character  | 200    |          |                     |
| 24  | Phone number                               | P15        | Character  | 40     |          |                     |
| 25  | Postcode of employer address               | P16        | Character  | 6      |          |                     |
| 26  | “Hukou” address                            | P17        | Character  | 200    |          |                     |
| 27  | Postcode of "Hukou" address                | P171       | Character  | 6      |          |                     |
| 28  | Name of the contact                        | P18        | Character  | 20     |          |                     |
| 29  | Relationship with the patient              | P19        | Character  | 40     |          |                     |
| 30  | Address of the contact                     | P20        | Character  | 200    |          |                     |
| 31  | Admission path                             | P804       | Character  | 1      |          |                     |
| 32  | Phone number of the contact                | P21        | Character  | 30     |          |                     |
| 33  | Admission date                             | P22        | Date, time |        | Yes      | yyyy-mm-dd HH:mm:ss |
| 34  | Department of admission                    | P23        | Character  | 6      | Yes      |                     |
| 35  | Ward of admission                          | P231       | Character  | 30     |          |                     |
| 36  | Department of patient being transferred to | P24        | Character  | 6      |          |                     |
| 37  | Discharge date                             | P25        | Date, time |        | Yes      | yyyy-mm-dd HH:mm:ss |
| 38  | Department of discharge                    | P26        | Character  | 6      | Yes      |                     |

|    |                                                    |       |           |     |     |                                                                    |
|----|----------------------------------------------------|-------|-----------|-----|-----|--------------------------------------------------------------------|
| 39 | Ward of discharge                                  | P261  | Character | 30  |     |                                                                    |
| 40 | Length of hospitalization                          | P27   | Number    | 6   | Yes |                                                                    |
| 41 | Diagnosis code of out-patient/emergency department | P28   | Character | 20  |     | Diagnosis code: ICD10                                              |
| 42 | Diagnosis of out-patient/emergency department      | P281  | Character | 100 | Yes |                                                                    |
| 43 | Admission status                                   | P29   | Character | 1   |     |                                                                    |
| 44 | Admission diagnosis code                           | P30   | Character | 30  |     | Diagnosis code: ICD10                                              |
| 45 | Admission diagnosis                                | P301  | Character | 100 |     |                                                                    |
| 46 | Date of diagnosis being confirmed                  | P31   | Date      |     |     | yyyy-mm-dd                                                         |
| 47 | Code of main diagnosis                             | P321  | Character | 20  | Yes | Diagnosis code: ICD10. If there's no appropriate one, fill in "NA" |
| 48 | Primary diagnosis                                  | P322  | Character | 100 | Yes |                                                                    |
| 49 | Primary diagnosis: admission status                | P805  | Character | 1   |     |                                                                    |
| 50 | Primary diagnosis: discharge status                | P323  | Character | 1   |     |                                                                    |
| 51 | Code of other diagnosis 1                          | P324  | Character | 20  |     | Diagnosis code: ICD10                                              |
| 52 | Other diagnosis 1                                  | P325  | Character | 100 |     |                                                                    |
| 53 | Other diagnosis 1: admission status                | P806  | Character | 1   |     |                                                                    |
| 54 | Other diagnosis 1: discharge status                | P326  | Character | 1   |     |                                                                    |
| 55 | Code of Other diagnosis 2                          | P327  | Character | 20  |     | Diagnosis code: ICD10                                              |
| 56 | Other diagnosis 2                                  | P328  | Character | 100 |     |                                                                    |
| 57 | Other diagnosis 2: admission status                | P807  | Character | 1   |     |                                                                    |
| 58 | Other diagnosis 2: discharge status                | P329  | Character | 1   |     |                                                                    |
| 59 | Code of Other diagnosis 3                          | P3291 | Character | 20  |     | Diagnosis code: ICD10                                              |
| 60 | Other diagnosis 3                                  | P3292 | Character | 100 |     |                                                                    |
| 61 | Other diagnosis 3: admission status                | P808  | Character | 1   |     |                                                                    |
| 62 | Other diagnosis 3: discharge status                | P3293 | Character | 1   |     |                                                                    |
| 63 | Code of Other diagnosis 4                          | P3294 | Character | 20  |     | Diagnosis code: ICD10                                              |
| 64 | Other diagnosis 4                                  | P3295 | Character | 100 |     |                                                                    |
| 65 | Other diagnosis 4: admission status                | P809  | Character | 1   |     |                                                                    |
| 66 | Other diagnosis 4: discharge status                | P3296 | Character | 1   |     |                                                                    |

|    |                                      |       |           |     |  |                       |
|----|--------------------------------------|-------|-----------|-----|--|-----------------------|
| 67 | Code of Other diagnosis 5            | P3297 | Character | 20  |  | Diagnosis code: ICD10 |
| 68 | Other diagnosis 5                    | P3298 | Character | 100 |  |                       |
| 69 | Other diagnosis 5: admission status  | P810  | Character | 1   |  |                       |
| 70 | Other diagnosis 5: discharge status  | P3299 | Character | 1   |  |                       |
| 71 | Code of Other diagnosis 6            | P3281 | Character | 20  |  | Diagnosis code: ICD10 |
| 72 | Other diagnosis 6                    | P3282 | Character | 100 |  |                       |
| 73 | Other diagnosis 6: admission status  | P811  | Character | 1   |  |                       |
| 74 | Other diagnosis 6: discharge status  | P3283 | Character | 1   |  |                       |
| 75 | Code of Other diagnosis 7            | P3284 | Character | 20  |  | Diagnosis code: ICD10 |
| 76 | Other diagnosis 7                    | P3285 | Character | 100 |  |                       |
| 77 | Other diagnosis 7: admission status  | P812  | Character | 1   |  |                       |
| 78 | Other diagnosis 7: discharge status  | P3286 | Character | 1   |  |                       |
| 79 | Code of Other diagnosis 8            | P3287 | Character | 20  |  | Diagnosis code: ICD10 |
| 80 | Other diagnosis 8                    | P3288 | Character | 100 |  |                       |
| 81 | Other diagnosis 8: admission status  | P813  | Character | 1   |  |                       |
| 82 | Other diagnosis 8: discharge status  | P3289 | Character | 1   |  |                       |
| 83 | Code of Other diagnosis 9            | P3271 | Character | 20  |  | Diagnosis code: ICD10 |
| 84 | Other diagnosis 9                    | P3272 | Character | 100 |  |                       |
| 85 | Other diagnosis 9: admission status  | P814  | Character | 1   |  |                       |
| 86 | Other diagnosis 9: discharge status  | P3273 | Character | 1   |  |                       |
| 87 | Code of Other diagnosis 10           | P3274 | Character | 20  |  | Diagnosis code: ICD10 |
| 88 | Other diagnosis 10                   | P3275 | Character | 100 |  |                       |
| 89 | Other diagnosis 10: admission status | P815  | Character | 1   |  |                       |
| 90 | Other diagnosis 10: discharge status | P3276 | Character | 1   |  |                       |
| 91 | Frequency of in-hospital infection   | P689  | Number    | 5   |  |                       |
| 92 | Code of pathological diagnosis 1     | P351  | Character | 20  |  | Diagnosis code: ICD10 |
| 93 | Pathological diagnosis 1             | P352  | Character | 100 |  |                       |
| 94 | Pathological number 1                | P816  | Character | 50  |  |                       |



|     |                                                         |      |            |              |  |                       |
|-----|---------------------------------------------------------|------|------------|--------------|--|-----------------------|
| 95  | Code of pathological diagnosis 2                        | P353 | Character  | 20           |  | Diagnosis code: ICD10 |
| 96  | Pathological diagnosis 2                                | P354 | Character  | 100          |  |                       |
| 97  | Pathological number 2                                   | P817 | Character  | 50           |  |                       |
| 98  | Code of pathological diagnosis 3                        | P355 | Character  | 20           |  | Diagnosis code: ICD10 |
| 99  | Pathological diagnosis 3                                | P356 | Character  | 100          |  |                       |
| 100 | Pathological number 3                                   | P818 | Character  | 50           |  |                       |
| 101 | External factors' code of trauma and poisoning 1        | P361 | Character  | 20           |  | Diagnosis code: ICD10 |
| 102 | External factors of trauma and poisoning 1              | P362 | Character  | 100          |  |                       |
| 103 | External factors' code of trauma and poisoning 2        | P363 | Character  | 20           |  | Diagnosis code: ICD10 |
| 104 | External factors of trauma and poisoning 2              | P364 | Character  | 100          |  |                       |
| 105 | External factors' code of trauma and poisoning 3        | P365 | Character  | 20           |  | Diagnosis code: ICD10 |
| 106 | External factors of trauma and poisoning 3              | P366 | Character  | 100          |  |                       |
| 107 | Allergen                                                | P371 | Collection | Multi-choice |  |                       |
| 108 | Allergic drug                                           | P372 | Character  | 100          |  |                       |
| 109 | HBsAg                                                   | P38  | Character  | 1            |  |                       |
| 110 | HCV-Ab                                                  | P39  | Character  | 1            |  |                       |
| 111 | HIV-Ab                                                  | P40  | Character  | 1            |  |                       |
| 112 | Coincidence between out-patient and discharge diagnosis | P411 | Character  | 1            |  |                       |
| 113 | Coincidence between admitting and discharge diagnosis   | P412 | Character  | 1            |  |                       |
| 114 | Coincidence between pre- and post-operation diagnosis   | P413 | Character  | 1            |  |                       |
| 115 | Coincidence between clinical and pathological diagnosis | P414 | Character  | 1            |  |                       |
| 116 | Coincidence between radial and pathological diagnosis   | P415 | Character  | 3            |  |                       |
| 117 | Rescue times                                            | P421 | Number     | 3            |  |                       |
| 118 | Succeeding rescue times                                 | P422 | Number     | 1            |  |                       |
| 119 | Strongest evidence of diagnosis                         | P687 | Character  | 1            |  |                       |
| 120 | Differentiation degree                                  | P688 | Character  | 40           |  |                       |
| 121 | Chief                                                   | P431 | Character  | 40           |  |                       |
| 122 | (Associate) chief physician                             | P432 | Character  | 40           |  |                       |
| 123 | Attending physician                                     | P433 | Character  | 40           |  |                       |

|     |                                  |       |            |     |                                       |                       |
|-----|----------------------------------|-------|------------|-----|---------------------------------------|-----------------------|
| 124 | Resident                         | P434  | Character  | 40  |                                       |                       |
| 125 | Primary nurse                    | P819  | Character  | 40  |                                       |                       |
| 126 | Refresher physician              | P435  | Character  | 40  |                                       |                       |
| 127 | Postgraduate intern              | P436  | Character  | 40  |                                       |                       |
| 128 | Intern                           | P437  | Character  | 40  |                                       |                       |
| 129 | Coder                            | P438  | Character  | 40  |                                       |                       |
| 130 | Medical record quality           | P44   | Character  | 1   |                                       |                       |
| 131 | Quality-control physician        | P45   | Character  | 40  |                                       |                       |
| 132 | Quality-control primary nurse    | P46   | Character  | 40  |                                       |                       |
| 133 | Quality-control date             | P47   | Date       |     |                                       | yyyy-mm-dd            |
| 134 | Operation / Procedure code 1     | P490  | Character  | 20  |                                       | Diagnosis code: ICD10 |
| 135 | Operation / Procedure date 1     | P491  | Date, time |     | Obliged if operation code isn't empty | yyyy-mm-dd HH:mm:ss   |
| 136 | Operation / Procedure level 1    | P820  | Character  | 1   |                                       |                       |
| 137 | Operation / Procedure name 1     | P492  | Character  | 100 | Obliged if operation code isn't empty |                       |
| 138 | Operation / Procedure part 1     | P493  | Character  | 4   |                                       |                       |
| 139 | Operation / Procedure duration 1 | P494  | Number     | 5   |                                       | Unit (hour)           |
| 140 | Surgeon 1                        | P495  | Character  | 40  |                                       |                       |
| 141 | First assistant 1                | P496  | Character  | 40  |                                       |                       |
| 142 | Second assistant 1               | P497  | Character  | 40  |                                       |                       |
| 143 | Anaesthesia 1                    | P498  | Character  | 6   |                                       |                       |
| 144 | Anaesthesia class 1              | P4981 | Character  | 1   |                                       |                       |
| 145 | Wound healing ratings 1          | P499  | Character  | 2   |                                       |                       |
| 146 | Anaesthesiologist 1              | P4910 | Character  | 40  |                                       |                       |
| 147 | Operation / Procedure code 2     | P4911 | Character  | 20  |                                       | Diagnosis code: ICD10 |
| 148 | Operation / Procedure date 2     | P4912 | Date, time |     |                                       | yyyy-mm-dd HH:mm:ss   |
| 149 | Operation / Procedure level 2    | P821  | Character  | 1   |                                       |                       |
| 150 | Operation / Procedure name 2     | P4913 | Character  | 100 |                                       |                       |
| 151 | Operation / Procedure part 2     | P4914 | Character  | 4   |                                       |                       |
| 152 | Operation / Procedure duration 2 | P4915 | Number     | 5   |                                       | Unit (hour)           |
| 153 | Surgeon 2                        | P4916 | Character  | 40  |                                       |                       |
| 154 | First assistant 2                | P4917 | Character  | 40  |                                       |                       |
| 155 | Second assistant 2               | P4918 | Character  | 40  |                                       |                       |
| 156 | Anaesthesia 2                    | P4919 | Character  | 6   |                                       |                       |
| 157 | Anaesthesia class 2              | P4982 | Character  | 1   |                                       |                       |
| 158 | Wound healing ratings 2          | P4920 | Character  | 2   |                                       |                       |

|     |                                     |       |            |     |  |                       |
|-----|-------------------------------------|-------|------------|-----|--|-----------------------|
| 159 | Anaesthesiologist 2                 | P4921 | Character  | 40  |  |                       |
| 160 | Operation / Procedure code 3        | P4922 | Character  | 20  |  | Diagnosis code: ICD10 |
| 161 | Operation / Procedure date 3        | P4923 | Date, time |     |  | yyyy-mm-dd HH:mm:ss   |
| 162 | Operation / Procedure level 3       | P822  | Character  | 1   |  |                       |
| 163 | Operation / Procedure name 3        | P4924 | Character  | 100 |  |                       |
| 164 | Operation / Procedure part 3        | P4925 | Character  | 4   |  |                       |
| 165 | Operation / Procedure duration<br>3 | P4526 | Number     | 5   |  | Unit (hour)           |
| 166 | Surgeon 3                           | P4527 | Character  | 40  |  |                       |
| 167 | First assistant 3                   | P4528 | Character  | 40  |  |                       |
| 168 | Second assistant 3                  | P4529 | Character  | 40  |  |                       |
| 169 | Anaesthesia 3                       | P4530 | Character  | 6   |  |                       |
| 170 | Anaesthesia class 3                 | P4983 | Character  | 1   |  |                       |
| 171 | Wound healing ratings 3             | P4531 | Character  | 2   |  |                       |
| 172 | Anaesthesiologist 3                 | P4532 | Character  | 40  |  |                       |
| 173 | Operation / Procedure code 4        | P4533 | Character  | 20  |  | Diagnosis code: ICD10 |
| 174 | Operation / Procedure date 4        | P4534 | Date, time |     |  | yyyy-mm-dd HH:mm:ss   |
| 175 | Operation / Procedure level 4       | P823  | Character  | 1   |  |                       |
| 176 | Operation / Procedure name 4        | P4535 | Character  | 100 |  |                       |
| 177 | Operation / Procedure part 4        | P4536 | Character  | 4   |  |                       |
| 178 | Operation / Procedure duration<br>4 | P4537 | Number     | 5   |  | Unit (hour)           |
| 179 | Surgeon 4                           | P4538 | Character  | 40  |  |                       |
| 180 | First assistant 4                   | P4539 | Character  | 40  |  |                       |
| 181 | Second assistant 4                  | P4540 | Character  | 40  |  |                       |
| 182 | Anaesthesia 4                       | P4541 | Character  | 6   |  |                       |
| 183 | Anaesthesia class 4                 | P4542 | Character  | 1   |  |                       |
| 184 | Wound healing ratings 4             | P4543 | Character  | 2   |  |                       |
| 185 | Anaesthesiologist 4                 | P4544 | Character  | 40  |  |                       |
| 186 | Operation / Procedure code 5        | P4545 | Date, time | 20  |  | Diagnosis code: ICD10 |
| 187 | Operation / Procedure date 5        | P4546 | Character  |     |  | yyyy-mm-dd HH:mm:ss   |
| 188 | Operation / Procedure level 5       | P824  | Character  | 1   |  |                       |
| 189 | Operation / Procedure name 5        | P4546 | Character  | 100 |  |                       |
| 190 | Operation / Procedure part 5        | P4547 | Character  | 4   |  |                       |
| 191 | Operation / Procedure duration<br>5 | P4548 | Number     | 5   |  | Unit (hour)           |
| 192 | Surgeon 5                           | P4549 | Character  | 40  |  |                       |
| 193 | First assistant 5                   | P4550 | Character  | 40  |  |                       |
| 194 | Second assistant 5                  | P4551 | Character  | 40  |  |                       |
| 195 | Anaesthesia 5                       | P4552 | Character  | 6   |  |                       |
| 196 | Anaesthesia class 5                 | P4985 | Character  | 1   |  |                       |
| 197 | Wound healing ratings 5             | P4553 | Character  | 2   |  |                       |
| 198 | Anaesthesiologist 5                 | P4554 | Character  | 40  |  |                       |

|     |                                     |        |            |     |  |                       |
|-----|-------------------------------------|--------|------------|-----|--|-----------------------|
| 199 | Operation / Procedure code 6        | P45002 | Character  | 20  |  | Diagnosis code: ICD10 |
| 200 | Operation / Procedure date 6        | P45003 | Date, time |     |  | yyyy-mm-dd HH:mm:ss   |
| 201 | Operation / Procedure level 6       | P825   | Character  | 1   |  |                       |
| 202 | Operation / Procedure name 6        | P45004 | Character  | 100 |  |                       |
| 203 | Operation / Procedure part 6        | P45005 | Character  | 4   |  |                       |
| 204 | Operation / Procedure duration<br>6 | P45006 | Number     | 5   |  | Unit (hour)           |
| 205 | Surgeon 6                           | P45007 | Character  | 40  |  |                       |
| 206 | First assistant 6                   | P45008 | Character  | 40  |  |                       |
| 207 | Second assistant 6                  | P45009 | Character  | 40  |  |                       |
| 208 | Anaesthesia 6                       | P45010 | Character  | 6   |  |                       |
| 209 | Anaesthesia class 6                 | P45011 | Character  | 1   |  |                       |
| 210 | Wound healing ratings 6             | P45012 | Character  | 2   |  |                       |
| 211 | Anaesthesiologist 6                 | P45013 | Character  | 40  |  |                       |
| 212 | Operation / Procedure code 7        | P45014 | Character  | 20  |  | Diagnosis code: ICD10 |
| 213 | Operation / Procedure date 7        | P45015 | Date, time |     |  | yyyy-mm-dd HH:mm:ss   |
| 214 | Operation / Procedure level 7       | P826   | Character  | 1   |  |                       |
| 215 | Operation / Procedure name 7        | P45016 | Character  | 100 |  |                       |
| 216 | Operation / Procedure part 7        | P45017 | Number     | 4   |  |                       |
| 217 | Operation / Procedure duration<br>7 | P45018 | Character  | 5   |  | Unit (hour)           |
| 218 | Surgeon 7                           | P45019 | Character  | 40  |  |                       |
| 219 | First assistant 7                   | P45020 | Character  | 40  |  |                       |
| 220 | Second assistant 7                  | P45021 | Character  | 40  |  |                       |
| 221 | Anaesthesia 7                       | P45022 | Character  | 6   |  |                       |
| 222 | Anaesthesia class 7                 | P45023 | Character  | 1   |  |                       |
| 223 | Wound healing ratings 7             | P45024 | Character  | 2   |  |                       |
| 224 | Anaesthesiologist 7                 | P45025 | Character  | 40  |  |                       |
| 225 | Operation / Procedure code 8        | P45026 | Character  | 20  |  | Diagnosis code: ICD10 |
| 226 | Operation / Procedure date 8        | P45027 | Date, time |     |  | yyyy-mm-dd HH:mm:ss   |
| 227 | Operation / Procedure level 8       | P827   | Character  | 1   |  |                       |
| 228 | Operation / Procedure name 8        | P45028 | Character  | 100 |  |                       |
| 229 | Operation / Procedure part 8        | P45029 | Character  | 4   |  |                       |
| 230 | Operation / Procedure duration<br>8 | P45030 | Number     | 5   |  | Unit (hour)           |
| 231 | Surgeon 8                           | P45031 | Character  | 40  |  |                       |
| 232 | First assistant 8                   | P45032 | Character  | 40  |  |                       |
| 233 | Second assistant 8                  | P45033 | Character  | 40  |  |                       |
| 234 | Anaesthesia 8                       | P45034 | Character  | 6   |  |                       |
| 235 | Anaesthesia class 8                 | P45035 | Character  | 1   |  |                       |
| 236 | Wound healing ratings 8             | P45036 | Character  | 2   |  |                       |
| 237 | Anaesthesiologist 8                 | P45037 | Character  | 40  |  |                       |
| 238 | Operation / Procedure code 9        | P45038 | Character  | 20  |  | Diagnosis code: ICD10 |

|     |                                   |        |            |     |  |                       |
|-----|-----------------------------------|--------|------------|-----|--|-----------------------|
| 239 | Operation / Procedure date 9      | P45039 | Date, time |     |  | yyyy-mm-dd HH:mm:ss   |
| 240 | Operation / Procedure level 9     | P828   | Character  | 1   |  |                       |
| 241 | Operation / Procedure name 9      | P45040 | Character  | 100 |  |                       |
| 242 | Operation / Procedure part 9      | P45041 | Character  | 4   |  |                       |
| 243 | Operation / Procedure duration 9  | P45042 | Number     | 5   |  | Unit (hour)           |
| 244 | Surgeon 9                         | P45043 | Character  | 40  |  |                       |
| 245 | First assistant 9                 | P45044 | Character  | 40  |  |                       |
| 246 | Second assistant 9                | P45045 | Character  | 40  |  |                       |
| 247 | Anaesthesia 9                     | P45046 | Character  | 6   |  |                       |
| 248 | Anaesthesia class 9               | P45047 | Character  | 1   |  |                       |
| 249 | Wound healing ratings 9           | P45048 | Character  | 2   |  |                       |
| 250 | Anaesthesiologist 9               | P45049 | Character  | 40  |  |                       |
| 251 | Operation / Procedure code 10     | P45050 | Character  | 20  |  | Diagnosis code: ICD10 |
| 252 | Operation / Procedure date 10     | P45051 | Date, time |     |  | yyyy-mm-dd HH:mm:ss   |
| 253 | Operation / Procedure level 10    | P829   | Character  | 1   |  |                       |
| 254 | Operation / Procedure name 10     | P45052 | Character  | 100 |  |                       |
| 255 | Operation / Procedure part 10     | P45053 | Character  | 4   |  |                       |
| 256 | Operation / Procedure duration 10 | P45054 | Number     | 5   |  | Unit (hour)           |
| 257 | Surgeon 10                        | P45055 | Character  | 40  |  |                       |
| 258 | First assistant 10                | P45056 | Character  | 40  |  |                       |
| 259 | Second assistant 10               | P45057 | Character  | 40  |  |                       |
| 260 | Anaesthesia 10                    | P45058 | Character  | 6   |  |                       |
| 261 | Anaesthesia class 10              | P45059 | Character  | 1   |  |                       |
| 262 | Wound healing ratings 10          | P45060 | Character  | 2   |  |                       |
| 263 | Anaesthesiologist 10              | P45061 | Character  | 40  |  |                       |
| 264 | Length of critical care           | P561   | Number     | 6   |  | Unit (day)            |
| 265 | Length of Grade 1 nursing         | P562   | Number     | 6   |  | Unit (day)            |
| 266 | Length of Grade 2 nursing         | P563   | Number     | 6   |  | Unit (day)            |
| 267 | Length of Grade 3 nursing         | P564   | Number     | 6   |  | Unit (day)            |
| 268 | Intensive care unit 1             | P6911  | Character  | 4   |  |                       |
| 269 | Entrance date and time 1          | P6912  | Date       |     |  | yyyy-mm-dd            |
| 270 | Exit date and time 1              | P6913  | Date       |     |  | yyyy-mm-dd            |
| 271 | Intensive care unit 2             | P6914  | Character  | 4   |  |                       |
| 272 | Entrance date and time 2          | P6915  | Date       |     |  | yyyy-mm-dd            |
| 273 | Exit date and time 2              | P6916  | Date       |     |  | yyyy-mm-dd            |
| 274 | Intensive care unit 3             | P6917  | Character  | 4   |  |                       |
| 275 | Entrance date and time 3          | P6918  | Date       |     |  | yyyy-mm-dd            |
| 276 | Exit date and time 3              | P6919  | Date       |     |  | yyyy-mm-dd            |
| 277 | Intensive care unit 4             | P6920  | Character  | 4   |  |                       |
| 278 | Entrance date and time 4          | P6921  | Date       |     |  | yyyy-mm-dd            |
| 279 | Exit date and time 4              | P6922  | Date       |     |  | yyyy-mm-dd            |

|     |                                                                  |       |            |              |     |                                  |
|-----|------------------------------------------------------------------|-------|------------|--------------|-----|----------------------------------|
| 280 | Intensive care unit 5                                            | P6923 | Character  | 4            |     |                                  |
| 281 | Entrance date and time 5                                         | P6924 | Date       |              |     | yyyy-mm-dd                       |
| 282 | Exit date and time 5                                             | P6925 | Date       |              |     | yyyy-mm-dd                       |
| 283 | Autopsy                                                          | P57   | Character  | 1            |     |                                  |
| 284 | First case of operation, treatment, examination and diagnosis    | P58   | Character  | 1            |     |                                  |
| 285 | Type of the patients with operation                              | P581  | Collection | Multi-choice |     |                                  |
| 286 | Follow-up                                                        | P60   | Character  | 1            |     |                                  |
| 287 | Follow-up time (week)                                            | P611  | Number     | 2            |     |                                  |
| 288 | Follow-up time (month)                                           | P612  | Number     | 2            |     |                                  |
| 289 | Follow-up time (year)                                            | P613  | Number     | 2            |     |                                  |
| 290 | Teach Case                                                       | P59   | Character  | 1            |     |                                  |
| 291 | Blood type (ABO)                                                 | P62   | Character  | 1            | Yes |                                  |
| 292 | Blood type (Rh)                                                  | P63   | Character  | 1            | Yes |                                  |
| 293 | Transfusion reaction                                             | P64   | Character  | 1            |     |                                  |
| 294 | Erythrocyte                                                      | P651  | Number     | 6            |     | Unit (U)                         |
| 295 | Platelet                                                         | P652  | Number     | 6            |     | Unit (bag)                       |
| 296 | Plasma                                                           | P653  | Number     | 6            |     | Unit (ml)                        |
| 297 | Whole blood                                                      | P654  | Number     | 6            |     | Unit (ml)                        |
| 298 | Autologous recovery                                              | P655  | Number     | 6            |     | Unit (ml)                        |
| 299 | Others                                                           | P656  | Number     | 6            |     | Unit (ml)                        |
| 300 | Age (less than 1 years old)                                      | P66   | Number     | 4,2          |     | Unit (month), two decimal places |
| 301 | New-born weight 1                                                | P681  | Number     | 6            |     | Unit (gram)                      |
| 302 | New-born weight 2                                                | P682  | Number     | 6            |     | Unit (gram)                      |
| 303 | New-born weight 3                                                | P683  | Number     | 6            |     | Unit (gram)                      |
| 304 | New-born weight 4                                                | P684  | Number     | 6            |     | Unit (gram)                      |
| 305 | New-born weight 5                                                | P685  | Number     | 6            |     | Unit (gram)                      |
| 306 | New-born weight at admission                                     | P67   | Number     | 6            |     | Unit (gram)                      |
| 307 | Pre-admitting (coma duration of cranial injury patients, hour)   | P731  | Number     | 6            |     | Unit (hour)                      |
| 308 | Pre-admitting (coma duration of cranial injury patients, minute) | P732  | Number     | 2            |     | Unit (min)                       |
| 309 | Post-admitting (coma duration of cranial injury patients, hour)  | P733  | Number     | 6            |     | Unit (hour)                      |
| 310 | Post-admitting coma duration of cranial injury patients, minute) | P734  | Number     | 2            |     | Unit (min)                       |
| 311 | Duration of ventilator application                               | P72   | Number     | 6            |     | Unit (hour)                      |

|     |                                                                                     |      |           |      |     |                    |
|-----|-------------------------------------------------------------------------------------|------|-----------|------|-----|--------------------|
| 312 | Readmission Plan within 31 days after discharge                                     | P830 | Character | 1    |     |                    |
| 313 | Readmission aims                                                                    | P831 | Character | 100  |     |                    |
| 314 | Method of discharge                                                                 | P741 | Character | 1    |     |                    |
| 315 | Hospital from which the patient is transferred                                      | P742 | Character | 100  |     |                    |
| 316 | Community service association/county hospital from which the patient is transferred | P743 | Character | 100  |     |                    |
| 317 | Gross charge                                                                        | P782 | Number    | 10,2 | Yes | Two decimal places |
| 318 | Out-of-pocket money                                                                 | P751 | Number    | 10,2 |     | Two decimal places |
| 319 | Cost for general medical care                                                       | P752 | Number    | 10,2 |     | Two decimal places |
| 320 | Cost for treatment                                                                  | P754 | Number    | 10,2 |     | Two decimal places |
| 321 | Cost for nursing care                                                               | P755 | Number    | 10,2 |     | Two decimal places |
| 322 | Cost for other integrated medical services                                          | P756 | Number    | 10,2 |     | Two decimal places |
| 323 | Cost for pathological diagnosis                                                     | P757 | Number    | 10,2 |     | Two decimal places |
| 324 | Cost for lab text                                                                   | P758 | Number    | 10,2 |     | Two decimal places |
| 325 | Cost for imaging test                                                               | P759 | Number    | 10,2 |     | Two decimal places |
| 326 | Cost for clinical diagnosis items                                                   | P760 | Number    | 10,2 |     | Two decimal places |
| 327 | Cost for nonoperation therapy                                                       | P761 | Number    | 10,2 |     | Two decimal places |
| 328 | Cost for clinical physical treatment                                                | P762 | Number    | 10,2 |     | Two decimal places |
| 329 | Operation-treatment cost                                                            | P763 | Number    | 10,2 |     | Two decimal places |
| 330 | Anaesthesia cost                                                                    | P764 | Number    | 10,2 |     | Two decimal places |
| 331 | Operation cost                                                                      | P765 | Number    | 10,2 |     | Two decimal places |
| 332 | Rehabilitation cost                                                                 | P767 | Number    | 10,2 |     | Two decimal places |
| 333 | Cost for traditional Chinese medicine                                               | P768 | Number    | 10,2 |     | Two decimal places |
| 334 | Cost for western medicine                                                           | P769 | Number    | 10,2 |     | Two decimal places |
| 335 | Cost for Antibiotics                                                                | P770 | Number    | 10,2 |     | Two decimal places |
| 336 | Cost for traditional Chinese medicine                                               | P771 | Number    | 10,2 |     | Two decimal places |
| 337 | Cost for Herbs                                                                      | P772 | Number    | 10,2 |     | Two decimal places |
| 338 | Cost for whole blood transfusion                                                    | P773 | Number    | 10,2 |     | Two decimal places |
| 339 | Cost for blood transfusion                                                          | P774 | Number    | 10,2 |     | Two decimal places |
| 340 | Cost for globin transfusion                                                         | P775 | Number    | 10,2 |     | Two decimal places |
| 341 | Cost for clotting factor transfusion                                                | P776 | Number    | 10,2 |     | Two decimal places |
| 342 | Cost for cytokine transfusion                                                       | P777 | Number    | 10,2 |     | Two decimal places |



|     |                                                     |      |        |      |  |                    |
|-----|-----------------------------------------------------|------|--------|------|--|--------------------|
| 343 | Cost for disposable medical material in examination | P778 | Number | 10,2 |  | Two decimal places |
| 344 | Cost for disposable medical material in treatment   | P779 | Number | 10,2 |  | Two decimal places |
| 345 | Cost for disposable medical material in operation   | P780 | Number | 10,2 |  | Two decimal places |
| 346 | Other cost                                          | P781 | Number | 10,2 |  | Two decimal places |

For peer review only



## Appendix A. China PEACE-Retrospective AMI Study Site Investigators by Hospital

Aba Tibetan and Qiang Autonomous Prefecture People's Hospital, ShipingWeng, ShuyingXie; Affiliated Hospital of Guiyang Medical College, Lirong Wu, Jiulin Chen; Affiliated Hospital of Hainan Medical College, Tianfa Li, Jun Wang; Affiliated Zhongshan Hospital of Dalian University, Qin Yu, Xiaofei Li; Alxa League Central Hospital, Zhong Li, ShiguoHao, Yuzhen Zhang, Xuemei Wu; Baiquan County People's Hospital, Yachen Zhang, Zhifeng Liu; Biyang People's Hospital, Zhongxin Wang, HaoJia; Bortala Mongol Autonomous Prefecture People's Hospital, Bayin Bate, BadengQiqige; Changda Hospital Of Anshan, Xiang Jin, Ting Cai; Chengwu County People's Hospital, Fengqin Liu, Dayong Xu; Chenxi County People's Hospital, Xuejin He, Shui Yang; Chongren County People's Hospital, Chun Yuan, Jiping Wang; County People's Hospital of Jinning, LihuaGu, Lin Li, Shijiao Chen; Dalian Municipal Central Hospital, YongchaoZhi, Lili Sun; Dao County People's Hospital, Shengcheng Zhou, Lingjiao Jin; Daofu County People's Hospital, Yong Leng, Liangchuan Zhang, Tianyun Deng; Dingyuan County People's Hospital of Anhui Province, Yuanjin Wang, Wenhua Zhang, Xinmin Ma; Dongyang People's Hospital, Weimin Li, Liang Lu, Xuan Ge; Dulong and Nu Autonomous County People's Hospital of Gongshan, Xiaoping Wu, Yanming He; Dunhua City Hospital of Jilin Province, FanjuMeng, Jia Li; Fenghuang County People's Hospital, Dexi Liao, Guangyong Liu, Wen Qin; Fengshan County People's Hospital, Wen Long, Xiangwen Chen; Fourth Hospital of Baotou City, Baohong Zhang, Yonghou Yin, Bin Tian; Fourth People's Hospital of Zigong City, Yong Yi, Chaoyong Wu; Fugu County People's Hospital of Shaanxi Province, Baoqi Liu, Zhihui Zhao, Haiming Li; Fujian Provincial Hospital, YansongGuo, Xinjing Chen; Fuling Center Hospital of Chongqing City, Liquan Xiang, Lin Ning; Gannan County People's Hospital, Mei Chen, Xin Jin, Guiling Li; General Hospital of the Yangtze River Shipping, Xiuqi Li, Xing'an Wu; Gongcheng Yao Autonomous County People's Hospital, Congjun Tan, Mingfang Feng, Meili Wang; Guangchang County People's Hospital, Liangfa Wen, Xiang Fu, QunxingXie; Guilin People's Hospital, Wei Zhang, Yanni Zhuang, Hua Lu; Guiping People's Hospital, Jiaqian Lu, Yu Huang; Haerbin 242 Hospital, Yin Zhou, Qiuling Hu; Haiyan People's Hospital, Chunhui Xiao, Xiaoli Hu; Heling Ge Er County People's Hospital, Yongshuan Wu, Qiuli Wang; Helong Municipal People's Hospital, Youlin Xu, Xuefei Yu; Henan Provincial People's Hospital, Chuanyu Gao, Jianhong Zhang, You Zhang; Heze Municipal Hospital, WentangNiu, Xiaolei Ma, Yong Wang; HGKY Group Company General Hospital, Xiaowen Pan, Yanlong Liu; Hua Xin Hospital First Hospital of Tsinghua University, Lifu Miao, Yanping Yin, Zhiying Zhang; Huairan People's Hospital, Shutang Feng; Huayin People's Hospital, Aiping Wang, Jiangli Zhang, Feipeng Li; Huaying People's Hospital, Hong Wang; Hunchun Hospital, Lijun Yu, Xinxin Zhao; Huizhou Municipal Central Hospital, Yuansheng Shen, Zhiming Li, Lizhen He; Hunan Province Mawangdui Hospital, ZhiyiRong, Wei Luo; Ji'an Municipal Central People's hospital, Xueqiao Wang; Jianghua Yao Autonomous County

1  
2  
3  
4  
5  
6  
7  
8  
9  
10  
11  
12  
13  
14  
15  
16  
17  
18  
19  
20  
21  
22  
23  
24  
25  
26  
27  
28  
29  
30  
31  
32  
33  
34  
35  
36  
37  
38  
39  
40  
41  
42  
43  
44  
45  
46  
47  
48  
49  
50  
51  
52  
53  
54  
55  
56  
57  
58  
59  
60

People's Hospital, Rongjun Wan, Jianglin Tang, Guanghan Wu; Jiangsu Haimen People's Hospital, Jie Wu, Bin Xu; Jiangxi Provincial People's Hospital, Qing Huang, Xiaohe Wu; Jiangzi County People's Hospital, Sang Ge, Pian Pu, PingcuoDuoji; Jilin Province People's Hospital, Hui Dai, Yuming Du, Wei Guo; Jilin Integrated Traditional Chinese & Western Medicine Hospital, Jilin Province, Jianping Shi; Jinghai County Hospital, Peihua Zhao, Jingsheng Sun; Jingxi County People's Hospital, Hongxiang Li, Wen Liang; Jingxing County Hospital, Zhiwen Dong, Zhenhai Zhao; Jingzhou Central Hospital, Xin Li, Qin Xu; Jiuquan City People's Hospital, Yaofeng Yuan, Zhirong Li; Jixi People's Hospital of The Jixi Municipal People's Hospital Medical Group, Jinbo Gao; Jize County Hospital, Qiu'eGuo; Kangbao County People's Hospital, Ruiqing Zhao, Guangjun Song; Keshiketengqi Hospital of Chifeng City, Lize Wang, Haiyun Song; Lanping Bai and Pumi Autonomous County People's Hospital, Jinwen He, Jinming He; Laoting County Hospital, Keyong Shang, Changjiang Liu, Kuituan Xi; Liaoyang Central Hospital, Rihui Liu, Peng Guo; Liaoyuan Central Hospital, ChaoyangGuo, Xiangjun Liu, Rujun Zhao, Zeyong Yu; Lindian County Hospital, Wenzhou Li, Xudong Jing, Huanling Wang; Linxiang People's Hospital, Xiyuan Zhao, Chao Zhang, Long Chen; Liujiang County People's Hospital, Meifa Wei, Yan Liu, Shengde Chen; Longyan First Hospital, Kaihong Chen, Yong Fang, Ying Liao; Luancheng County Hospital, Junli Wang, Tianyu Liu, Suzhe Cheng; Lucheng People's Hospital, Yunke Zhou, XiaoxiaNiu, Huifang Cao; Luchuan County People's Hospital, Zebin Feng, Min Feng; Luxi County People's Hospital, FeilongDuan, Haiming Yi; Luyi County People's Hospital, Yuanxun Xu, AnranGuo; Macheng People's Hospital, Xianshun Zhou, HongzhuanCai, Peng Zheng; Mengcheng First People's Hospital, GaofengGuo; MenglianLahudaiwa autonomous counties People's Hospital, Xiang Li; Min County People's Hospital, MinwuBao, Yuhong Liu; Nanjing First Hospital, Shaoliang Chen, HaiboJia, Hongjuan Peng; Nan'an Hospital, Duanping Dai, Shaoxiong Hong; Nantong Third People's Hospital, Song Chen, Dongya Zhang, Ying Wang; Nanyang Central Hospital, Yudong Li, Jianbu Gao, Shouzhong Yang; Ningwu County People's Hospital, Junhu An; Peking University People's Hospital, Chenyang Shen, Yunfeng Liu; Peking University Shenzhen Hospital, Chun Wu, Huan Qu, Saiyong Chen; People's Hospital of Jingyu, Yuhui Lin, Dehai Jiao; People's Hospital of Yueqing City, Manhong Wang, Qiu Wang; Pianguan County People's Hospital, YingliangXue, Ruijun Zhang; Puding County People's Hospital, Cheng Yuan, Lei Wu; Qinghai Red Cross Hospital, Jianqing Zhang, Chunmei Wei, Yanmei Shen; Qinshui County People's Hospital, Hehua Zhang, Hongmei Pan, Yong Gao; Qinyang People's Hospital, Xiaowen Ma, Yanli Liang, Tianbiao Wang; Queshan County People's Hospital, Daguo Zhao; Quzhou People's Hospital, XiaomingTu, Zhenyan Gao; Rongjiang County People's Hospital, Fangning Wang, Qiang Yang; Rudong County People's Hospital, Xiaoping Kang, Jianbin Fang, Dongmei Liu; Ruyang County People's Hospital, Chengning Shen, Mengfei Li; Shangluo Central Hospital, Yingmin Guan, Wenfeng Wang, Ting Xiao; ShangqiuChangzheng People's Hospital, Qian Wang; Shaoyang County People's Hospital, Fengyun Jiang, Kaiyou Wu; Shengsi People's

1  
2  
3 Hospital, Songguo Wang; Shenyang Weikang Hospital, Xujie Fu, Shu Zhang, Lifang Gao;  
4 ShougangShuicheng Iron & Steel (Group) Co., Ltd. General Hospital, Min Zhang, Kai Fu,  
5 XiaojingDuan; Shuangshan Hospital Of Anshan, Rui Xiao, Ruixia Wu, Bin Li; Siziwang  
6 County People's Hospital, Hongtu Zhang, Yuerong Ma, Zhonghui Cao; SunanYugur  
7 Autonomous County People's Hospital, Zhansheng Ba, Wanhai Fu; Taizhou Hospital of  
8 Zhejiang Province, Jianjun Jiang, YafeiMi, Weiwei Zhou; The Affiliated Hospital of Beihua  
9 University, Feng Sun, Qi Zhang, Shiyu Zheng; The Fifth People's Hospital of Dalian, Jing  
10 Zhang, Yang Zhong; The First Affiliated Hospital of Hebei North University, Fangjiang Li,  
11 Xiaoyuan Wang; The First Affiliated Hospital of Henan University of Science &  
12 Technology, Pingshuan Dong, Laijing Du, Wei Liu; The First Affiliated Hospital Of Jia Mu  
13 Si University, Zhaofa He, Meihua Jin; The First Hospital of Fuzhou City, Ting Jiang,  
14 Zhuoyan Chen; The First Hospital of Xi'an, Manli Cheng, YuqiangJi; The First People's  
15 Hospital of Danzhou, Youhua Zhou, Jvyuan Li; The First People's Hospital of Guangzhou,  
16 Yizhi Pan, Jian Liu; The First People's Hospital of Guangyuan, Tianxun Wang, Ping Yang;  
17 The Fourth People's Hospital of Shangqiu Shi, Guiyu Huang,  
18 JianjunPan, QingliangCai, Qianying Wang; The General Hospital of Yongzhou, Hunan  
19 Province, MingliLv; The people's hospital of Wuchuan, Yuanming Yi, Xuelian Deng; The  
20 People's Hospital of Yuanling, Wenhua Chen, RongCai; The People's Hospital of Zhijiang  
21 City, Bing Zhang; The Second Affiliated Hospital of Harbin Medical University, Bo Yu,  
22 Yousheng Xu, Zhengqiu Wang; The Second Affiliated Hospital of Kunming Medical  
23 University, Jun Shu, Ge Zhang, Kai Li; The Second Central Hospital of Baoding City, Guang  
24 Ma, PuxiaSuo; The Second People's Hospital of Liaoyuan City, Aimin Zhang, Yongfen  
25 Kang; Tianjin Medical University General Hospital, Zheng Wan, Yuemin Sun, Bo Bian; Tibet  
26 Autonomous Region People's Hospital, Xuejun Hu, DawaCiren; Tongchuan Mining Bureau  
27 Central Hospital, GuojiongJia, Jieli Pan; Tongliang County People's Hospital, Guofu Li,  
28 Hongliang Zhang, Longliang Zhan; Tongliao City Horqin District First People's Hospital,  
29 Junping Fang, Xinli Yu; Ulanqab Central Hospital, Dacheng Wang, Dajun Liu, Xinhong Cao;  
30 Wencheng County People's Hospital, Yi Tian, HaishengZhu, Wanchuan Liu; Wuhai People's  
31 Hospital, Zhaohai Zhou, Lei Shi; Wuhu Second People's Hospital, Wuwang Fang, Manxin  
32 Chen; Wulate County People's Hospital, FuqinHan, JianyeFu, Yunmei Wang; Wuqiang  
33 County People's Hospital, Binglu Liu, YanliangZhang, Xiupin Yuan; Wuyishan Municipal  
34 Hospital, Qingfei Lin, Yun Chen; Xiangtan County People's Hospital, Yuliang Zhu,  
35 ZhiqiangCai; Xing County People's Hospital, Xingping Li, LirongAo; Xingshan County  
36 People's Hospital, Shubing Wu, Hui Zhang; Xinmi First People's Hospital, Fusheng Zhao,  
37 Guangming Yang; Xinshao County People's Hospital, Renfei Liu, Wenwei Ai; Xiuwu  
38 County People's Hospital, JianbaoChang, Haijie Zhao; Xuanhan County People's Hospital,  
39 Qijun Ran, Xuan Ma; Xupu County People's Hospital, Shijun Jiang, Xiaochun Shu; Yanggao  
40 County People's Hospital, Zhiru Peng, Yan Han; Yanqing County Hospital, Jianbin Wang, Li  
41 Yang; Ying County People's Hospital, Yu Shen, Xingcun Shang; Yitong Manchu

1  
2  
3 Autonomous County First People's Hospital, Haifeng Wang; Yongxing County People's  
4 Hospital, Hongyan Li, Zhisong Liao, Yang Cao; Yuanzhou District People's Hospital of  
5 Guyuan City, Xiaoping Gao, MeiyinCai, Lining You; Yuncheng Central Hospital, Xuexin  
6 Li, Shuqin Li, Yingjia Li; Yunlong County People's Hospital, Jianxun Yang, Song Ai, Jianfei  
7 Ma; Yuyao People's Hospital, Lailin Deng; ZhangjiachuanHui Autonomous County First  
8 People's Hospital, Keyu Wang, Shitang Gao, Jian Guan; Zhouning County Hospital, Banghua  
9 He, Youyi Lu; Zhuoni County People's Hospital, Weirong Yang, Hong Li; Zhuozi County  
10 People's Hospital, Zhizhong Zhang, Xiaohong Chi; Zuoyun County People's Hospital, Ru  
11 Duan, Guangli Wang.  
12  
13  
14  
15  
16  
17  
18  
19  
20  
21  
22  
23  
24  
25  
26  
27  
28  
29  
30  
31  
32  
33  
34  
35  
36  
37  
38  
39  
40  
41  
42  
43  
44  
45  
46  
47  
48  
49  
50  
51  
52  
53  
54  
55  
56  
57  
58  
59  
60

## Appendix B. China PEACE Study Consultants

Study Consultants: Paul S. Chan, MD, MSc, Jersey Chen, MD, MPH, David J. Cohen, MD, MSc, Nihar R. Desai, MD, MPH, Kumar Dharmarajan MD, MBA, Mikhail N. Kosiborod, MD, Jing Li, MD, PhD, Xi Li, MD, PhD, Zhenqiu Lin, PhD, Frederick A. Masoudi, MD, MSPH, Jennifer Mattera, DrPH, MPH, Brahmajee K. Nallamothu, MD, MPH, Khurram Nasir, MD, MPH, Sharon-Lise T. Normand, PhD, Joseph S. Ross, MD MHS, John A. Spertus, MD, MPH, Henry H. Ting, MD, Xiao Xu, PhD

St. Luke's Mid America Heart Institute/University of Missouri Kansas City (PSC, DJC, MNK, JAS), Kansas City, Missouri, United States; Kaiser Permanente (JC), Mid-Atlantic Permanente Research Institute, Rockville, Maryland, United States; Center for Outcomes Research and Evaluation (NRD, KD, ZL, JM, JSR, XX), Yale-New Haven Hospital, New Haven, Connecticut, United States; Division of Cardiology (KD), Department of Internal Medicine, Columbia University Medical Center, New York, New York, United States; State Key Laboratory of Cardiovascular Disease (JL, XL), China Oxford Centre for International Health Research, Fuwai Hospital, National Center for Cardiovascular Diseases, Chinese Academy of Medical Sciences and Peking Union Medical College, Beijing, People's Republic of China; Division of Cardiology (FAM), University of Colorado Anschutz Medical Campus, Aurora, Colorado, United States; Veterans Affairs Health Services Research and Development Center of Excellence (BKN), Veterans Affairs Ann Arbor Healthcare System, Ann Arbor, Michigan, United States; Department of Internal Medicine (BKN) and Center for Healthcare Outcomes and Policy (BKN), University of Michigan, Ann Arbor, Michigan, United States; Research Director, Center for Prevention and Wellness (KN), Baptist Health South Florida, Miami, Florida, United States; Department of Biostatistics (S-LTN), Harvard School of Public Health, Boston, Massachusetts, United States; Department of Health Care Policy (S-LTN), Harvard Medical School, Boston, Massachusetts, United States; Section of General Internal Medicine and the Robert Wood Johnson Clinical Scholars Program (JSR), Department of Internal Medicine, Yale University School of Medicine, Connecticut, United States; Division of Cardiovascular Diseases (HHT) and Knowledge and Evaluation Research Unit (HHT), Mayo Clinic College of Medicine, Rochester, Minnesota. United States; Department of Obstetrics, Gynecology, and Reproductive Sciences (XX), Yale School of Medicine, New Haven, Connecticut, United States

# BMJ Open

## Are Medical Record Front Page Data Suitable for Risk Adjustment in Hospital Performance Measurement: Development and Validation of a Risk Model of In-hospital Mortality after Acute Myocardial Infarction

|                                 |                                                                                                                                                                                                                                                                                                                                                                                                                                                                                                                                                                                                                                                                                                                                                                                                                                                                                                                                                                                                                                                                                                                                                                                                                                                                                                                                                                                                                                                                                                                                                                                                                                                                                                                       |
|---------------------------------|-----------------------------------------------------------------------------------------------------------------------------------------------------------------------------------------------------------------------------------------------------------------------------------------------------------------------------------------------------------------------------------------------------------------------------------------------------------------------------------------------------------------------------------------------------------------------------------------------------------------------------------------------------------------------------------------------------------------------------------------------------------------------------------------------------------------------------------------------------------------------------------------------------------------------------------------------------------------------------------------------------------------------------------------------------------------------------------------------------------------------------------------------------------------------------------------------------------------------------------------------------------------------------------------------------------------------------------------------------------------------------------------------------------------------------------------------------------------------------------------------------------------------------------------------------------------------------------------------------------------------------------------------------------------------------------------------------------------------|
| Journal:                        | <i>BMJ Open</i>                                                                                                                                                                                                                                                                                                                                                                                                                                                                                                                                                                                                                                                                                                                                                                                                                                                                                                                                                                                                                                                                                                                                                                                                                                                                                                                                                                                                                                                                                                                                                                                                                                                                                                       |
| Manuscript ID                   | bmjopen-2020-045053.R1                                                                                                                                                                                                                                                                                                                                                                                                                                                                                                                                                                                                                                                                                                                                                                                                                                                                                                                                                                                                                                                                                                                                                                                                                                                                                                                                                                                                                                                                                                                                                                                                                                                                                                |
| Article Type:                   | Original research                                                                                                                                                                                                                                                                                                                                                                                                                                                                                                                                                                                                                                                                                                                                                                                                                                                                                                                                                                                                                                                                                                                                                                                                                                                                                                                                                                                                                                                                                                                                                                                                                                                                                                     |
| Date Submitted by the Author:   | 25-Jan-2021                                                                                                                                                                                                                                                                                                                                                                                                                                                                                                                                                                                                                                                                                                                                                                                                                                                                                                                                                                                                                                                                                                                                                                                                                                                                                                                                                                                                                                                                                                                                                                                                                                                                                                           |
| Complete List of Authors:       | <p>Wu, Chaoqun; Chinese Academy of Medical Sciences and Peking Union Medical College, National Clinical Research Center of Cardiovascular Diseases, State Key Laboratory of Cardiovascular Disease, Fuwai Hospital, National Center for Cardiovascular Diseases</p> <p>Zhang, Danwei; National Clinical Research Center for Cardiovascular Diseases, NHC Key Laboratory of Clinical Research for Cardiovascular Medications, State Key Laboratory of Cardiovascular Disease, Fuwai Hospital, Chinese Academy of Medical Sciences and Peking Union Medical College, National Center for Cardiovascular Diseases</p> <p>Bai, Xueke; National Clinical Research Center of Cardiovascular Diseases, State Key Laboratory of Cardiovascular Disease, Fuwai Hospital, National Center for Cardiovascular Diseases, Chinese Academy of Medical Sciences and Peking Union Medical College</p> <p>Zhou, Tiannan; Center for Outcomes Research and Evaluation, Yale-New Haven Health System</p> <p>Wang, Yongfei; Yale School of Medicine, Section of Cardiovascular Medicine</p> <p>Lin, Zhenqiu; Yale-New Haven Hospital, Center for Outcomes Research and Evaluation</p> <p>He, Guangda; National Clinical Research Center for Cardiovascular Diseases, NHC Key Laboratory of Clinical Research for Cardiovascular Medications, State Key Laboratory of Cardiovascular Disease, Fuwai Hospital, Chinese Academy of Medical Sciences and Peking Union Medical College, National Center for Cardiovascular Diseases</p> <p>Li, Xi; Chinese Academy of Medical Sciences &amp; Peking Union Medical College Fuwai Hospital Department of Radiology and Imaging, National Clinical Research Center of Cardiovascular Diseases</p> |
| <b>Primary Subject Heading</b>: | Health informatics                                                                                                                                                                                                                                                                                                                                                                                                                                                                                                                                                                                                                                                                                                                                                                                                                                                                                                                                                                                                                                                                                                                                                                                                                                                                                                                                                                                                                                                                                                                                                                                                                                                                                                    |
| Secondary Subject Heading:      | Health informatics, Medical management, Cardiovascular medicine                                                                                                                                                                                                                                                                                                                                                                                                                                                                                                                                                                                                                                                                                                                                                                                                                                                                                                                                                                                                                                                                                                                                                                                                                                                                                                                                                                                                                                                                                                                                                                                                                                                       |
| Keywords:                       | Health informatics < BIOTECHNOLOGY & BIOINFORMATICS, Myocardial infarction < CARDIOLOGY, Quality in health care < HEALTH SERVICES ADMINISTRATION & MANAGEMENT                                                                                                                                                                                                                                                                                                                                                                                                                                                                                                                                                                                                                                                                                                                                                                                                                                                                                                                                                                                                                                                                                                                                                                                                                                                                                                                                                                                                                                                                                                                                                         |
|                                 |                                                                                                                                                                                                                                                                                                                                                                                                                                                                                                                                                                                                                                                                                                                                                                                                                                                                                                                                                                                                                                                                                                                                                                                                                                                                                                                                                                                                                                                                                                                                                                                                                                                                                                                       |

1  
2  
3  
4  
5  
6  
7  
8  
9  
10  
11  
12  
13  
14  
15  
16  
17  
18  
19  
20  
21  
22  
23  
24  
25  
26  
27  
28  
29  
30  
31  
32  
33  
34  
35  
36  
37  
38  
39  
40  
41  
42  
43  
44  
45  
46  
47  
48  
49  
50  
51  
52  
53  
54  
55  
56  
57  
58  
59  
60

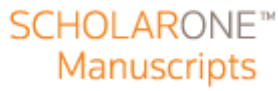





I, the Submitting Author has the right to grant and does grant on behalf of all authors of the Work (as defined in the below author licence), an exclusive licence and/or a non-exclusive licence for contributions from authors who are: i) UK Crown employees; ii) where BMJ has agreed a CC-BY licence shall apply, and/or iii) in accordance with the terms applicable for US Federal Government officers or employees acting as part of their official duties; on a worldwide, perpetual, irrevocable, royalty-free basis to BMJ Publishing Group Ltd ("BMJ") its licensees and where the relevant Journal is co-owned by BMJ to the co-owners of the Journal, to publish the Work in this journal and any other BMJ products and to exploit all rights, as set out in our [licence](#).

The Submitting Author accepts and understands that any supply made under these terms is made by BMJ to the Submitting Author unless you are acting as an employee on behalf of your employer or a postgraduate student of an affiliated institution which is paying any applicable article publishing charge ("APC") for Open Access articles. Where the Submitting Author wishes to make the Work available on an Open Access basis (and intends to pay the relevant APC), the terms of reuse of such Open Access shall be governed by a Creative Commons licence – details of these licences and which [Creative Commons](#) licence will apply to this Work are set out in our licence referred to above.

Other than as permitted in any relevant BMJ Author's Self Archiving Policies, I confirm this Work has not been accepted for publication elsewhere, is not being considered for publication elsewhere and does not duplicate material already published. I confirm all authors consent to publication of this Work and authorise the granting of this licence.



1  
2  
3  
4 **Are Medical Record Front Page Data Suitable for Risk Adjustment in**  
5  
6 **Hospital Performance Measurement: Development and Validation of a Risk**  
7  
8  
9 **Model of In-hospital Mortality after Acute Myocardial Infarction**  
10

11 Chaoqun Wu<sup>1</sup>, Danwei Zhang<sup>1</sup>, Xueke Bai<sup>1</sup>, Tiannan Zhou<sup>2</sup>, Yongfei Wang<sup>2</sup>, Zhenqiu Lin

12  
13  
14 <sup>2</sup>, Guangda He<sup>1</sup>, Xi Li<sup>1</sup>

15  
16  
17 for the China PEACE Collaborative Group  
18  
19  
20  
21

22 1 National Clinical Research Center for Cardiovascular Diseases, NHC Key Laboratory of  
23  
24 Clinical Research for Cardiovascular Medications, State Key Laboratory of Cardiovascular  
25  
26 Disease, Fuwai Hospital, Chinese Academy of Medical Sciences and Peking Union Medical  
27  
28 College, National Center for Cardiovascular Diseases;  
29  
30

31  
32 2 Center for Outcomes Research and Evaluation, Yale-New Haven Health System, New  
33  
34 Haven, Connecticut, United States.  
35  
36  
37  
38

39 **Correspondence:** Dr Li Xi, National Clinical Research Center for Cardiovascular Diseases,  
40  
41 Fuwai Hospital, 167 Beilishi Road, Beijing 100037, People's Republic of China; Tel: +86 10  
42  
43 8839 6203; Fax: +86 10 8836 5201; Email: xi.li@fwoxford.org  
44  
45  
46  
47  
48  
49  
50  
51  
52

53 **Word count for the abstract:** 254  
54

55 **Word count for the text of the manuscript:** 3872  
56  
57  
58  
59  
60

## ABSTRACT

### Objectives

To develop a model of in-hospital mortality using MRFP data, and assess its validity in case-mix standardization by comparison with a model developed using the complete medical record data.

### Design

A nationally representative retrospective study.

### Setting

Representative hospitals in China, covering 161 hospitals in modelling cohort and 156 hospitals in validation cohort.

### Participants

Representative patients admitted for AMI. 8370 patients in modelling cohort and 9704 patients in validation cohort.

### Primary outcome measures

In-hospital mortality, which was defined explicitly as death that occurred during hospitalization, and the hospital-level risk standardized mortality rate (RSMR)

### Results

A total of 14 variables were included in the model predicting in-hospital mortality based on MRFP data, with the AUC of 0.78 among modelling cohort and 0.79 among validation cohort. The median of absolute difference between the hospital RSMR predicted by hierarchical generalized linear models established based on MRFP data and complete medical record data, which was built as 'reference model', was 0.08% (10th and 90th percentiles: -

1  
2  
3  
4 1.8% and 1.6%). In the regression model comparing the RSMR between two models, the  
5  
6 slope and intercept of the regression equation is 0.90 and 0.007 in modelling cohort, while  
7  
8 0.85 and 0.010 in validation cohort, which indicated that the evaluation capability from two  
9  
10 models were very similar.  
11  
12

### 13 14 **Conclusions**

15  
16 The models based on MRFP data showed good discrimination and calibration capability, as  
17  
18 well as similar risk prediction effect in comparison with the model based on complete medical  
19  
20 record data, which proved that MRFP data could be suitable for risk adjustment in hospital  
21  
22 performance measurement.  
23  
24  
25  
26  
27  
28  
29  
30  
31

### 32 **KEY WORDS**

33  
34  
35 Health informatics, Myocardial infarction, Quality in health care  
36  
37  
38  
39  
40  
41  
42  
43  
44  
45  
46  
47  
48  
49  
50  
51  
52  
53  
54  
55  
56  
57  
58  
59  
60

## Strengths and limitations of this study

- The analysis was based on a nationally representative cohort of hospitals in China, from which random samples of patients admitted with AMI was drawn to represent the heterogeneity in outcome of care.
- We used hierarchical generalized linear models that fully consider the patient clustering in hospitals, and is able to distinguish the differences within and between hospitals, which suits the purpose to adjust for case-mix in hospital performance comparison.
- We validated the finding that concise data extracted from medical record front page are good enough to reflect patients' risk profile, using the data from a closer year.
- External validations that include more diverse hospitals and among other diseases will be needed in the future.

## INTRODUCTION

Equal access to high-quality health care is one of the major aims in China's recent public hospital reform<sup>1 2</sup>. To continuously improve quality of care and mitigate its disparities across regions or hospitals, sustainable monitoring of hospital performance, particularly patient outcomes, is firstly required<sup>3 4</sup>. The Ministry of Health (named as "National Health Commission" now) of China established the Hospital Quality Monitoring System (HQMS) in 2011, to collect key information of all hospitalizations, including patients' diagnosis and outcomes recorded in the medical record front page (MRFP) using a standardized form (Table S1)<sup>5 6</sup>. Although the MRFP lack of detailed information on treatment process such as lab test results or medications, with structured records on diagnosis, procedure and outcome, it could be utilized as a unique nationwide data source of outcome quality assessment (i.e. in-hospital mortality).

Assessing quality of care between hospitals needs to take into account patients' different demographic and clinical characteristics of patients between hospitals, like most of the prior studies have done based on a broad array of information from complete medical record<sup>7-9</sup>. However, it is still unclear whether the MRFP data collected in HQMS can act as good surrogates for complete medical record model in estimation of risk-standardized mortality.

In China PEACE (Patient-centred Evaluative Assessment of Cardiac Events) - Retrospective study, we built a nationally representative sample of patients hospitalized for acute myocardial infarction (AMI) and extracted high-quality data from their complete medical records (including medical record front pages), which provided an ideal condition to assess disparities in quality of care,<sup>10</sup>. We aim to develop a model of in-hospital mortality

1  
2  
3  
4 using their MRFP data, then assess its effect in case-mix standardization by comparing with a  
5  
6 model developed using the complete medical record data of the same patient cohort.  
7  
8  
9

## 10 11 **METHODS**

### 12 13 14 **Patient and Public Involvement**

15  
16 No patient involved.  
17

### 18 19 **Study design and population**

20  
21  
22 The design of China PEACE-Retrospective AMI study has been published previously <sup>11</sup>. In  
23  
24 brief, the study used a stratified two-stage random sampling method to select representative  
25  
26 hospitals and patients admitted for AMI nationwide during 2001, 2006, and 2011. In addition,  
27  
28 the study also included a more recent sample of patients admitted in 2015 using the same  
29  
30 random sampling process. Firstly, five regions (Eastern cities, Central and Western cities,  
31  
32 Eastern villages, Central villages, and Western villages) were used for representative hospital  
33  
34 selection by simple random sampling method. Secondly, AMI cases (diagnosed as ICD-9  
35  
36 coded 410.xx or ICD-10 coded I21.xx, or key words from discharge diagnosis) were  
37  
38 randomly selected from all patients who met the inclusion criteria in each selected hospital by  
39  
40 random sampling method. Trained personnel at the national coordinating centres abstracted  
41  
42 data from the medical records using standardized data definitions. Data abstraction quality  
43  
44 was monitored by randomly audits that ensured that the overall variable accuracy exceeded  
45  
46  
47  
48  
49  
50  
51  
52  
53 98% <sup>11</sup>.  
54

55  
56 The Ethics Committee at the National Center for Cardiovascular Diseases approved the  
57  
58 study (2012-377; 2016-769). All collaborating hospitals either accepted central ethics  
59  
60

1  
2  
3  
4 approval or obtained local ethics approval by their ethics committees. As a retrospective  
5  
6 study, written informed consent of patients were not required.  
7  
8

9 In this study, patients from year 2011 were regarded as the modelling cohort, and patients  
10  
11 from the year 2015 were regarded as the validation cohort. Patients who transferred out to  
12  
13 another hospital were excluded since we could not get their outcomes. A total of 8370 patients  
14  
15 from 161 hospitals (96 secondary hospitals and 65 tertiary hospitals) were included as  
16  
17 modelling cohort, and another 9704 patients from 156 hospitals (93 secondary hospitals and  
18  
19 63 tertiary hospitals) were included as validation cohort. In addition, if a hospital had less  
20  
21 than 10 eligible patients per year, it would be further excluded from the hospital-level  
22  
23 analysis. 8269 patients (137 hospitals, 73 secondary hospitals and 64 tertiary hospitals) from  
24  
25 modelling cohort and 9583 patients (132 hospitals, 71 secondary hospitals and 61 tertiary  
26  
27 hospitals) from validation cohort were included in the further analysis (Figure S1).  
28  
29  
30  
31  
32  
33

### 34 35 **Statistical analysis**

36  
37 According to study aim, we need to develop and evaluate a model predicting in-hospital  
38  
39 outcome at patient level based on MRFP data from modelling cohort firstly. If the model  
40  
41 performed well, then another model used to evaluate hospital quality of care would be built  
42  
43 based on prior model. The validation cohort was used to conduct external evaluation of  
44  
45 models. Hospital level model would be built based on complete medical record data, which  
46  
47 could be considered as 'the best reference'. By comparing the difference and association of  
48  
49 the indicators evaluated by the MRFP model and the complete medical record model, we  
50  
51 could explore whether the model based on MRFP data had similar efficiency with that based  
52  
53 on complete medical record data. The analysis roadmap was demonstrated in Figure 1.  
54  
55  
56  
57  
58  
59  
60

## Candidate predictors and outcome

Patient characteristics were selected as candidate predictors, according to previous AMI predictive models such as GRACE, TIMI, and ACTION-GWTG<sup>7-9 12-17</sup>. For the model based on MRFP data, the candidate predictors included demographic characteristics (gender, age, medical insurance status, ethnicity, marital status), admission department, diagnosis at admission (cardiac arrest) and at discharge (acute ST-segment elevation myocardial infarction [STEMI], infarction position, hypertension, diabetes, dyslipidaemia, cardiogenic shock, heart failure, stroke, renal failure), which was available from MRFP data. For the model based on complete medical record, we additionally include patients' symptoms, vital signs and lab test results at admission.

In-hospital mortality, as the outcome variable in the models, was defined explicitly as death that occurred during hospitalization, which was recorded both on the MRFP and elsewhere such as discharge record. For the accuracy of analysis, we used complete medical record as data source. We did not include patients who withdraw treatment as outcome since we could not get "withdraw" information from MRFP data, though plenty of these patients might die soon after giving up treatment.

## Patient-level model development and evaluation

A logistic regression model was built based on MRFP data from the modelling cohort. Area under receiver operating characteristic curve (AUC) and observed rates in deciles determined by model estimating value were used to evaluate the discrimination. Slope and intercept of regression equation between the observed and the predicted mortality was used to evaluate the calibration ability. To assess the overfitting of the model, we used the coefficients estimated



1  
2  
3  
4 from the logistic model to predict the probability of mortality in the validation cohort, by  
5  
6 multiplying coefficients by the observed risk factors variables and summing over for each  
7  
8 subject. Then another logistic regression model was built, in which the dependent variable  
9  
10 was observed mortality and independent variables were the predicted mortality generated as  
11  
12 above. The slope different from 1 and the intercept different from 0 indicated overfitting.  
13  
14  
15

16  
17 Furthermore, we re-estimated the logistic regression model in the validation cohort used  
18  
19 selected predictors above. If the estimated coefficients of new model were similar to prior, the  
20  
21 selected predictors were considered to be stable. Discrimination and calibration were also  
22  
23 evaluated in the re-established logistic model.  
24  
25

26  
27 Complete medical record model was developed and validated based on the data from  
28  
29 complete medical records, using the same method mentioned above. Additionally, we  
30  
31 compared the performance of our complete medical record model and MRFP model with the  
32  
33 GRACE in-hospital mortality model<sup>7</sup> among development and validation cohorts, by  
34  
35 calculating the difference of AUC and the Integrated discrimination improvement(IDI)  
36  
37 (Appendix A).  
38  
39  
40  
41

### 42 **Hospital-level model development and comparison**

43  
44 Hierarchical generalized linear models (HGLM) were established among modelling and  
45  
46 validation cohort separately, using above selected covariates and hospitals as random effects.  
47  
48 HGLM considered the patient clustering in hospitals, and could be used to distinguish the  
49  
50 differences of outcome within and between hospitals.  
51  
52  
53

54  
55 Hospital-level risk standardized mortality rate (RSMR) was used as an indicator to  
56  
57 evaluating hospital quality of care in this study. The RSMR of each hospital could be  
58  
59  
60

1  
2  
3  
4 calculated from HGLM as the ratio of predicted and expected mortality of the hospital,  
5  
6 multiplied by the unadjusted rate of all hospitals. The expected mortality is the mortality rate  
7  
8 of the hospital if patients in each hospital were treated in a “reference” hospital; the predicted  
9  
10 mortality accounted for the characteristics of a hospital (the hospital-level random effects of  
11  
12 the model) <sup>8 18</sup>.

13  
14  
15  
16  
17 We use two methods to compare the RSMR derived from the HGLMs based on MRFP  
18  
19 and the complete medical record data. (1) Absolute differences of RSMR from two models  
20  
21 were calculated, and the distribution of differences was described using mean, median, and  
22  
23 maximum. (2) A linear regression model was built, with RSMR from the complete medical  
24  
25 record data as the dependent variable and RSMR from the MRFP data as the independent  
26  
27 variable. The slope of the model approaching 1 and the intercept approaching 0 indicated that  
28  
29 the predicted probabilities from the two models were very similar. All above calculation and  
30  
31 comparison would be conducted among the modelling and validation cohort separately.  
32  
33  
34  
35  
36

37  
38 All statistical inferences were performed on two-tailed test, and  $p < 0.05$  was considered  
39  
40 statistically significant. The statistical software used is SAS 9.4 (SAS Institute Inc., Cary,  
41  
42 North Carolina).  
43  
44  
45  
46  
47

## 48 **RESULTS**

### 49 **Study Population and Characteristics**

50  
51 In the modelling cohort, the average age was  $65.4 \pm 12.8$  years, and 2519 (30.1%) patients  
52  
53 were female. About 1/2 of the patients were admitted to cardiovascular department at  
54  
55 admission. 65.8% were diagnosed with STEMI, while 46.5%, 19.7% and 10.0% had  
56  
57  
58  
59  
60

1  
2  
3  
4 comorbidities of hypertension, diabetes and dyslipidaemia, respectively. Cardiogenic shock  
5  
6 occurred in 4.8% of the patients, and 0.1% of patients had cardiac arrest before admission  
7  
8  
9 (Table 1). A total of 621 patients died during hospitalization, accounting for 7.4% of the  
10  
11 modelling cohort.  
12  
13

14 Compared with modelling cohort, patients in the validation cohort had a higher  
15  
16 proportion of patients with medical insurance and admission in cardiovascular departments  
17  
18 (p<0.001). Less proportion (49.0%) of patients were diagnosed with STEMI (p<0.001), while  
19  
20 a greater proportion of patients had hypertension, diabetes, dyslipidaemia, heart failure and  
21  
22 renal failure (p<0.05) (Table 1). 689 patients died during hospitalization, accounting for 7.1%  
23  
24 of the validation cohort, which was not significantly different from the modelling cohort  
25  
26 (p=0.41).  
27  
28  
29  
30  
31

### 32 **Development and validation of patient-level model**

33

34  
35 A total of 14 risk factors were included in the MRFP model based on modelling cohort  
36  
37 (Figure 2a). Model discrimination was good, with the AUC of 0.78, and observed mortality  
38  
39 rate ranging from 0.83% in the lowest decile of the predicted mortality rate to 26.88% in the  
40  
41 highest decile. The slope of the calibration curve was 0.91 and the intercept was -0.007,  
42  
43 which showed the good calibration ability of this model (Table 2). The overfitting statistics  
44  
45 were within an acceptable range (slope=1.01, intercept=-0.07), indicating that no overfitting  
46  
47 exist.  
48  
49  
50  
51

52  
53 The predictors included above were applied to the validation cohort to reconstruct the  
54  
55 model, which showed that the effect direction and size were still similar (Figure 2a). In the  
56  
57 validation cohort, the AUC was 0.79, with observed mortality rate ranging from 1.00% to  
58  
59  
60

1  
2  
3  
4 29.72%, and the slope and intercept of the calibration curve was 0.93 and 0.005 (Figure S2  
5  
6 and Table 2).  
7

8  
9 Using the same method, a complete medical record model was built, in which a total of  
10  
11 13 risk factors were included (Figure 2b). The AUC of the model was 0.79, and observed  
12  
13 mortality rate ranged from 0.51% in the lowest decile to 27.96% in the highest decile. The  
14  
15 slope of the calibration curve was 0.94 and the intercept was 0.004 (Figure S2 and Table 2).  
16  
17 Similar with the MRFP model, the complete medical record model had good discrimination  
18  
19 and calibration, as well as relatively stable coefficients when validated among the validation  
20  
21 cohort (Figure 2b, Figure S2 and Table2). Additional analysis showed that both our two  
22  
23 patient risk prediction model had better AUC (all p value<0.001) and positive IDI among  
24  
25 development and validation cohorts compared with the GRACE prediction model (Appendix  
26  
27 A).  
28  
29  
30  
31  
32  
33  
34

### 35 **Development and comparison of hospital-level model**

36  
37 8269 patients (137 hospitals, 73 secondary hospitals and 64 tertiary hospitals) from modelling  
38  
39 cohort and 9583 patients (132 hospitals, 71 secondary hospitals and 61 tertiary hospitals) from  
40  
41 validation cohort were included in estimating the hospital-level HGLMs.  
42  
43  
44

45 In the modelling cohort, the median hospital-level RSMR was 7.4% (IQR: 5.2% -  
46  
47 10.1%). The median of absolute difference between the RSMR predicted by the complete  
48  
49 medical record data and MRFP data was 0.08% (IQR: -0.67% - 0.53%), and the 10th and 90th  
50  
51 percentiles were -1.8% and 1.6%, with no statistical significance (p=0.499). In the validation  
52  
53 cohort, the median RSMR was 6.4% (IQR: 4.5% - 10.4%), and the median of absolute  
54  
55 difference was 0.05%, with 10th and 90th percentiles of -2.8% and 1.9% (Figure S3). For the  
56  
57  
58  
59  
60

1  
2  
3  
4 regression model comparing the RSMR between the MRFP data and complete medical record  
5  
6 data, the slope (intercept) was 0.90 (0.007) in the modelling cohort, while 0.85 (0.010) in the  
7  
8 validation cohort (Figure 3). The correlations among secondary hospitals were better than  
9  
10 among tertiary hospitals.  
11  
12  
13  
14  
15  
16

## 17 **DISCUSSION**

18  
19 This study developed patient and hospital level MRFP models of in-hospital mortality of  
20  
21 AMI, and took into account the patient case-mix in the hospital-level disparity analysis. These  
22  
23 models based on MRFP data showed good discrimination and calibration capability, as well  
24  
25 as similar risk prediction effect in comparison with the model based on complete medical  
26  
27 record data, which proved that MRFP data could be suitable for risk adjustment in hospital  
28  
29 performance measurement in China.  
30  
31  
32  
33  
34

35 To our knowledge, the current study extended literatures in several ways. First, this is the  
36  
37 first in-hospital mortality risk model based only on MRFP data in China. Currently in China,  
38  
39 it is still difficult to obtain detailed complete medical records data nationwide for quality  
40  
41 monitoring, due to the fragmentation in development and deployment of Hospital Information  
42  
43 Systems and Electronic Medical Record Systems. In the United States which faces similar  
44  
45 challenges, several risk models have been developed using concise administrative claims data,  
46  
47 and successfully applied as substitute of complete medical record models<sup>8 9</sup>. The key value of  
48  
49 this model is to demonstrate how MRFP data from HQMS can serve as a solution for national  
50  
51 quality assessment, rather than to identify coefficients of specific risk characteristics.  
52  
53  
54  
55  
56  
57

58 Second, the methods we chosen for model development specifically to standardize the  
59  
60

1  
2  
3  
4 hospital-level case-mix. We firstly selected an array of patient characteristics that influence  
5  
6 their risk profile significantly using backward logistic regression, and confirmed the stability  
7  
8 of this array in the validation cohort. Then we established a HGLM using these  
9  
10 characteristics, because the HGLM takes into account the correlation of patients admitted in  
11  
12 the same hospital to avoid underestimating the standard error of other risk factors,<sup>18 19</sup>  
13  
14 which fits the nature that patients clustered within individual hospitals, and has been well-  
15  
16 tested in previous studies on hospital-level comparisons<sup>7-9</sup>.  
17  
18  
19  
20  
21

22 Third, model based on MRFP data was robustly validated by not only repeating in  
23  
24 validation cohorts, but more importantly comparing with which based on complete medical  
25  
26 records data. Even though there is no real golden standard of risk standardization, medical  
27  
28 record data enable the most complete characteristics of patients' demographic and clinical  
29  
30 profile. The China PEACE Retrospective study provided a unique opportunity to compare the  
31  
32 MRFP model against the complete medical record model, because scanning copies of  
33  
34 sampled medical records were collected, and detailed information on patient characteristics  
35  
36 had been centrally extracted from the front page and all other parts of medical records.  
37  
38  
39  
40  
41  
42

43 The feasibility of MRFP model has significant policy implications for China, as the  
44  
45 government emphasized the importance of hospital performance monitoring<sup>20</sup>. China needs a  
46  
47 nationwide data platform, which supports timely, accurate and sustainable outcome  
48  
49 measurement, since the outcomes of care such as mortality provide a global assessment of  
50  
51 quality and have the most relevance to patients. However, outcome measurement is  
52  
53 challenging, because of variation among hospitals in patients' risk profile, meanwhile  
54  
55 extracting data from electronic medical records is infeasible in most hospitals. Our study  
56  
57  
58  
59  
60

1  
2  
3  
4 firstly proved that concise medical record front page data that are available in the HQMS can  
5  
6 sufficiently reflect patients' risk profile, which makes it suitable to generating risk-  
7  
8 standardized mortality rates at hospital-level. Thus, this existing platform covering 1800  
9  
10 (73%) tertiary hospitals and 2300 (26%) secondary hospitals can serve as a base for national  
11  
12 hospital performance measurement, similar to the United States Centers for Medicare &  
13  
14 Medicaid Services' use of administrative claims data <sup>19 20</sup>. Moreover, some challenges should  
15  
16 to be addressed. First, the quality of MRFP data across hospitals, particularly the  
17  
18 completeness of comorbidity documentation and accuracy of diagnosis coding in diagnosis,  
19  
20 needs to be improved <sup>21</sup>. Second, for chronic conditions with low in-hospital mortality rates,  
21  
22 data on post-discharge outcomes (e.g. 30-day readmission rates) data need to be obtained  
23  
24 from clinical registries, insurance claims and other sources.  
25  
26  
27  
28  
29  
30  
31

### 32 **Limitations of the study**

33  
34 There are some limitations in this study. First, weaker correlation in tertiary hospitals between  
35  
36 RSMRs generated from the two risk models indicated a relatively poorer performance of  
37  
38 current MRFP model applied in tertiary hospitals. However, this could be improved if the  
39  
40 model development and disparity assessment were conducted within subgroups of hospitals  
41  
42 separately. Second, although this study was based on nationally representative cohorts with  
43  
44 model development and validation using data from different years, external validations that  
45  
46 include more diverse hospitals will be needed in the future.  
47  
48  
49  
50  
51

### 52 **Conclusion**

53  
54 In conclusion, the MRFP model of in-hospital mortality supported that HQMS data could  
55  
56 act as reasonable substitute for complete medical record data in risk adjustment between  
57  
58  
59  
60

1  
2  
3  
4 hospitals across the nation. The lessons from AMI treatment could serve as a model to  
5  
6 nationwide assessment on quality of care in other clinical fields.  
7  
8  
9

## 10 11 **ACKNOWLEDGMENTS**

12  
13  
14 We appreciate the multiple contributions made by study teams at National Clinical Research  
15  
16 Center for Cardiovascular Diseases and Yale-New Haven Hospital Center for Outcomes  
17  
18 Research and Evaluation in study design and operations, particularly the data collection by Yi  
19  
20 Pi, Jiamin Liu, Wuhanbilige Hundei, Haibo Zhang, Lihua Zhang, Wenchi Guan, Xiaofang  
21  
22 Yan, Yuan Yu, Xiqian Huo, Xin Zheng, and Yuanlin Guo. We appreciate the editing by Aoxi  
23  
24 Tian and Xingyi Zhang. We are grateful for the support provided by the Chinese government.  
25  
26  
27  
28  
29  
30  
31

## 32 33 **China PEACE-Retrospective AMI Study Site Investigators**

34  
35 Shiping Weng, Shuying Xie; Lirong Wu, Jiulin Chen; Tianfa Li, Jun Wang; Qin Yu, Xiaofei  
36  
37 Li; Zhong Li, Shiguo Hao, Yuzhen Zhang, Xuemei Wu; Yachen Zhang, Zhifeng Liu;  
38  
39 Zhongxin Wang, Hao Jia; Bayin Bate, Badeng Qiqige; Xiang Jin, Ting Cai; Fengqin Liu,  
40  
41 Dayong Xu; Xuejin He, Shui Yang; Chun Yuan, Jiping Wang; Lihua Gu, Lin Li, Shijiao  
42  
43 Chen; Yongchao Zhi, Lili Sun; Shengcheng Zhou, Lingjiao Jin; Yong Leng, Liangchuan  
44  
45 Zhang, Tianyun Deng; Yuanjin Wang, Wenhua Zhang, Xinmin Ma; Weimin Li, Liang Lu,  
46  
47 Xuan Ge; Xiaoping Wu, Yanming He; Fanju Meng, Jia Li; Dexi Liao, Guangyong Liu, Wen  
48  
49 Qin; Wen Long, Xiangwen Chen; Baohong Zhang, Yonghou Yin, Bin Tian; Yong Yi,  
50  
51 Chaoyong Wu; Baoqi Liu, Zhihui Zhao, Haiming Li; Yansong Guo, Xinjing Chen; Liquan  
52  
53 Xiang, Lin Ning; Mei Chen, Xin Jin, Guiling Li; Xiuqi Li, Xing'an Wu; Congjun Tan,  
54  
55  
56  
57  
58  
59  
60



1  
2  
3  
4 Mingfang Feng, Meili Wang; Liangfa Wen, Xiang Fu, Qunxing Xie; Wei Zhang, Yanni  
5  
6 Zhuang, Hua Lu; Jiaqian Lu, Yu Huang; Yin Zhou, Qiuling Hu; Chunhui Xiao, Xiaoli Hu;  
7  
8  
9 Yongshuan Wu, Qiuli Wang; Youlin Xu, Xuefei Yu; Chuanyu Gao, Jianhong Zhang, You  
10  
11 Zhang; Wentang Niu, Xiaolei Ma, Yong Wang; Xiaowen Pan, Yanlong Liu; Lifu Miao,  
12  
13  
14 Yanping Yin, Zhiying Zhang; Shutang Feng; Aiping Wang, Jiangli Zhang, Feipeng Li; Hong  
15  
16 Wang; Lijun Yu, Xinxin Zhao; Yuansheng Shen, Zhiming Li, Lizhen He; Zhiyi Rong, Wei  
17  
18 Luo; Xueqiao Wang; Rongjun Wan, Jianglin Tang, Guanghan Wu; Jie Wu, Bin Xu; Qing  
19  
20 Huang, Xiaohe Wu; Sang Ge, Pian Pu, Pingcuo Duoqi; Hui Dai, Yuming Du, Wei Guo;  
21  
22  
23 Jianping Shi; Peihua Zhao, Jingsheng Sun; Hongxiang Li, Wen Liang; Zhiwen Dong, Zhenhai  
24  
25 Zhao; Xin Li, Qin Xu; Yaofeng Yuan, Zhirong Li; Jinbo Gao; Qiu'e Guo; Ruiqing Zhao,  
26  
27  
28 Guangjun Song; Lize Wang, Haiyun Song; Jinwen He, Jinming He; Keyong Shang,  
29  
30  
31 Changjiang Liu, Kuituan Xi; Rihui Liu, Peng Guo; Chaoyang Guo, Xiangjun Liu, Rujun  
32  
33 Zhao, Zeyong Yu; Wenzhou Li, Xudong Jing, Huanling Wang; Xiyuan Zhao, Chao Zhang,  
34  
35  
36 Long Chen; Meifa Wei, Yan Liu, Shengde Chen; Kaihong Chen, Yong Fang, Ying Liao; Junli  
37  
38 Wang, Tianyu Liu, Suzhe Cheng; Yunke Zhou, Xiaoxia Niu, Huifang Cao; Zebin Feng, Min  
39  
40  
41 Feng; Feilong Duan, Haiming Yi; Yuanxun Xu, Anran Guo; Xianshun Zhou, Hongzhan Cai,  
42  
43  
44 Peng Zheng; Gaofeng Guo; Xiang Li; Minwu Bao, Yuhong Liu; Shaoliang Chen, Haibo Jia,  
45  
46  
47 Hongjuan Peng; Duanping Dai, Shaoxiong Hong; Song Chen, Dongya Zhang, Ying Wang;  
48  
49  
50 Yudong Li, Jianbu Gao, Shouzhong Yang; Junhu An; Chenyang Shen, Yunfeng Liu; Chun  
51  
52  
53 Wu, Huan Qu, Saiyong Chen; Yuhui Lin, Dehai Jiao; Manhong Wang, Qiu Wang; Yingliang  
54  
55  
56 Xue, Ruijun Zhang; Cheng Yuan, Lei Wu; Jianqing Zhang, Chunmei Wei, Yanmei Shen;  
57  
58  
59 Hehua Zhang, Hongmei Pan, Yong Gao; Xiaowen Ma, Yanli Liang, Tianbiao Wang; Daguo  
60

1  
2  
3  
4 Zhao; Xiaoming Tu, Zhenyan Gao; Fangning Wang, Qiang Yang; Xiaoping Kang, Jianbin  
5  
6 Fang, Dongmei Liu; Chengning Shen, Mengfei Li; Yingmin Guan, Wenfeng Wang, Ting  
7  
8 Xiao; Qian Wang; Fengyun Jiang, Kaiyou Wu; Songguo Wang; Xujie Fu, Shu Zhang, Lifang  
9  
10 Gao; Min Zhang, Kai Fu, Xiaojing Duan; Rui Xiao, Ruixia Wu, Bin Li; Hongtu Zhang,  
11  
12 Yuerong Ma, Zhonghui Cao; Zhansheng Ba, Wanhai Fu; Jianjun Jiang, Yafei Mi, Weiwei  
13  
14 Zhou; Feng Sun, Qi Zhang, Shiyu Zheng; Jing Zhang, Yang Zhong; Fangjiang Li, Xiaoyuan  
15  
16 Wang; Pingshuan Dong, Laijing Du, Wei Liu; Zhaofa He, Meihua Jin; Ting Jiang, Zhuoyan  
17  
18 Chen; Manli Cheng, Yuqiang Ji; Youhua Zhou, Jvyuan Li; Yizhi Pan, Jian Liu; Tianxun  
19  
20 Wang, Ping Yang; Guiyu Huang, Jianjun Pan, Qingliang Cai, Qianying Wang; Yuanming Yi,  
21  
22 Xuelian Deng; Wenhua Chen, RongCai; Bing Zhang; Bo Yu, Yousheng Xu, Zhengqiu Wang;  
23  
24 Jun Shu, Ge Zhang, Kai Li; Guang Ma, Puxia Suo; Aimin Zhang, Yongfen Kang; Zheng  
25  
26 Wan, Yuemin Sun, Bo Bian; Xuejun Hu, Dawa Ciren; Guojiong Jia, Jieli Pan; Guofu Li,  
27  
28 Hongliang Zhang, Longliang Zhan; Junping Fang, Xinli Yu; Dacheng Wang, Dajun Liu,  
29  
30 Xinhong Cao; Yi Tian, Haisheng Zhu, Wanchuan Liu; Zhaohai Zhou, Lei Shi; Wuwang Fang,  
31  
32 Manxin Chen; Fuqin Han, Jianye Fu, Yunmei Wang; Binglu Liu, Yanliang Zhang, Xiupin  
33  
34 Yuan; Qingfei Lin, Yun Chen; Yuliang Zhu, Zhiqiang Cai; Xingping Li, Lirong Ao; Shubing  
35  
36 Wu, Hui Zhang; Fusheng Zhao, Guangming Yang; Renfei Liu, Wenwei Ai; Jianbao Chang,  
37  
38 Haijie Zhao; Qijun Ran, Xuan Ma; Shijun Jiang, Xiaochun Shu; Zhiru Peng, Yan Han;  
39  
40 Jianbin Wang, Li Yang; Yu Shen, Xingcun Shang; Haifeng Wang; Hongyan Li, Zhisong  
41  
42 Liao, Yang Cao; Xiaoping Gao, Meiyong Cai, Lining You; Xuexin Li, Shuqin Li, Yingjia Li;  
43  
44 Jianxun Yang, Song Ai, Jianfei Ma; Lailin Deng; Keyu Wang, Shitang Gao, Jian Guan;  
45  
46 Banghua He, Youyi Lu; Weirong Yang, Hong Li; Zhizhong Zhang, Xiaohong Chi; Ru Duan,  
47  
48  
49  
50  
51  
52  
53  
54  
55  
56  
57  
58  
59  
60

1  
2  
3  
4 Guangli Wang.  
5  
6  
7  
8

## 9 **Funding**

10  
11 This work was supported by the National Key Research and Development Program  
12  
13 [2017YFC1310803] from the Ministry of Science and Technology of China, the Chinese  
14  
15 Academy of Medical Sciences Innovation Fund for Medical Science [2017-I2M-2-002] the  
16  
17 111 Project from the Ministry of Education of China [B16005], and the National Key  
18  
19 Technology R&D Program [2015BAI12B01] from the Ministry of Science and Technology  
20  
21 of China. The sponsors had no role in the conduct of the study; in the collection, management,  
22  
23 analysis, and interpretation of the data; or in the preparation or approval of the manuscript.  
24  
25  
26  
27  
28

## 29 **Declaration of conflicting interests**

30  
31  
32 None declared.  
33  
34

## 35 **Author contributions**

36  
37 XL contributed to the conception or design of the work. CW, DZ and XB contributed to the  
38  
39 acquisition of data for the work. CW and XB contributed to the analysis of data for the work.  
40  
41  
42 CW, DZ, TZ and XL contributed to the interpretation of data for the work. CW and DZ  
43  
44 drafted the manuscript. TZ, YW, ZL, GH and XL critically revised the manuscript. All gave  
45  
46 final approval and agree to be accountable for all aspects of work ensuring integrity and  
47  
48 accuracy.  
49  
50  
51  
52

## 53 **Data availability**

54  
55 No additional data available  
56  
57  
58  
59  
60

## REFERENCES

1. General Office of the State Council. Opinions of the General Office of the State Council on Strengthening the Performance Evaluation of Public Hospitals. In: GeneralOfficeoftheStateCouncilofthePeople'sRepublicofChina, ed., 2019.
2. National Health Commission. Measures for medical quality management. Secondary Measures for medical quality management 2016. <http://www.nhc.gov.cn/fzs/s3576/201610/ae125f28eef24ca7aac57c8ec530c6d2.shtml>.
3. Li X, Krumholz HM. What does it take to improve nationwide healthcare quality in China? *BMJ Quality & Safety* 2019;bmjqs-2019-009839.
4. Jiang L, Krumholz HM, Li X, et al. Achieving best outcomes for patients with cardiovascular disease in China by enhancing the quality of medical care and establishing a learning health-care system. *Lancet (London, England)* 2015;**386**(10002):1493-505.
5. Department of Medical Management of the Ministry of Health. Notice on the pilot project of direct reporting of medical service supervision information network, 2011.
6. Bureau of Medical Administration of National Health Commission. Hospital Quality Monitoring System. Secondary Hospital Quality Monitoring System. <https://www.hqms.org.cn/login.jsp>.
7. Granger CB, Goldberg RJ, Dabbous O, et al. Predictors of hospital mortality in the global registry of acute coronary events. *Archives of internal medicine* 2003;**163**(19):2345-53.
8. Krumholz HM, Wang Y, Mattera JA, et al. An administrative claims model suitable for profiling hospital performance based on 30-day mortality rates among patients with an acute myocardial infarction. *Circulation* 2006;**113**(13):1683-92.
9. Krumholz HM, Chen J, Wang Y, et al. Comparing AMI mortality among hospitals in patients 65 years of age and older: evaluating methods of risk adjustment. *Circulation* 1999;**99**(23):2986-92.
10. Li X, Murugiah K, Li J, et al. Urban–rural comparisons in Hospital Admission, Treatments, and Outcomes for ST-Segment–Elevation Myocardial Infarction in China from 2001 to 2011. *Circ Cardiovasc Qual Outcomes* 2017;**10**(11): e003905(11).
11. Dharmarajan K, Li J, Li X, et al. The China Patient-Centered Evaluative Assessment of Cardiac Events (China PEACE) retrospective study of acute myocardial infarction: study design. *Circulation Cardiovascular quality and outcomes* 2013;**6**(6):732-40.
12. Antman EM, Cohen M, Bernink PJ, et al. The TIMI risk score for unstable angina/non-ST elevation MI: A method for prognostication and therapeutic decision making. *Jama* 2000;**284**(7):835-42.
13. Morrow DA, Antman EM, Charlesworth A, et al. TIMI risk score for ST-elevation myocardial infarction: A convenient, bedside, clinical score for risk assessment at presentation: An intravenous nPA for treatment of infarcting myocardium early II trial substudy. *Circulation* 2000;**102**(17):2031-7.
14. Chin CT, Chen AY, Wang TY, et al. Risk adjustment for in-hospital mortality of contemporary patients with acute myocardial infarction: the acute coronary treatment and intervention outcomes network (ACTION) registry-get with the guidelines

- 1  
2  
3 (GWTG) acute myocardial infarction mortality model and risk score. *Am Heart J*  
4 2011;**161**(1):113-22.e2.  
5  
6 15. Morrow DA, Antman EM, Giugliano RP, et al. A simple risk index for rapid initial triage  
7 of patients with ST-elevation myocardial infarction: an InTIME II substudy. *Lancet*  
8 (*London, England*) 2001;**358**(9293):1571-5.  
9  
10 16. Lee KL, Woodlief LH, Topol EJ, et al. Predictors of 30-day mortality in the era of  
11 reperfusion for acute myocardial infarction. Results from an international trial of  
12 41,021 patients. GUSTO-I Investigators. *Circulation* 1995;**91**(6):1659-68.  
13  
14 17. Normand ST, Glickman ME, Sharma RG, et al. Using admission characteristics to predict  
15 short-term mortality from myocardial infarction in elderly patients. Results from the  
16 Cooperative Cardiovascular Project. *JAMA* 1996;**275**(17):1322-28.  
17  
18 18. Shahian DM, Torchiana DF, Shemin RJ, et al. Massachusetts cardiac surgery report card:  
19 implications of statistical methodology. *Ann Thorac Surg* 2005;**80**(6):2106-13.  
20  
21 19. Austin PC, Tu JV, Alter DA. Comparing hierarchical modeling with traditional logistic  
22 regression analysis among patients hospitalized with acute myocardial infarction:  
23 should we be analyzing cardiovascular outcomes data differently? *Am Heart J*  
24 2003;**145**(1):27-35.  
25  
26 20. Xinhua News Agency. Interpretation on "the guiding opinions on the establishment of  
27 modern hospital management system" by the head of the Medical Reform Office of  
28 the State Council. Secondary Interpretation on "the guiding opinions on the  
29 establishment of modern hospital management system" by the head of the Medical  
30 Reform Office of the State Council Jul 26 2017. [http://www.gov.cn/xinwen/2017-  
31 07/26/content\\_5213541.htm](http://www.gov.cn/xinwen/2017-07/26/content_5213541.htm).  
32  
33 21. Wang Y. The challenge and solution for the front page of inpatient medical record based  
34 on DRGs. *Chinese Journal of Hospital Administration* 2015;**31**(11):831-33.  
35  
36  
37  
38  
39  
40  
41  
42  
43  
44  
45  
46  
47  
48  
49  
50  
51  
52  
53  
54  
55  
56  
57  
58  
59  
60

1  
2  
3  
4 **TABLES**  
5

6 **Table 1. Patients' characteristics from MRFP data and in-hospital mortality in modelling**  
7  
8 **cohort and validation cohort.**  
9

10  
11  
12  
13  
14  
15  
16  
17  
18  
19  
20  
21  
22  
23  
24  
25  
26  
27  
28  
29  
30  
31  
32  
33  
34  
35  
36  
37  
38  
39  
40  
41  
42  
43  
44  
45  
46  
47  
48  
49  
50  
51  
52  
53  
54  
55  
56  
57  
58  
59  
60

|                                           | <b>Modelling Cohort</b> | <b>Validation Cohort</b> |                |
|-------------------------------------------|-------------------------|--------------------------|----------------|
|                                           | <b>(Year 2011)</b>      | <b>(Year 2015)</b>       | <b>p value</b> |
|                                           | <b>N=8370</b>           | <b>N=9704</b>            |                |
| <b>In-hospital mortality</b>              | 621 (7.4)               | 687 (7.1)                | 0.3793         |
| <b>Female</b>                             | 2519 (30.1)             | 3121 (32.2)              | 0.0028         |
| <b>Age, mean(SD)</b>                      | 65.4 (12.8)             | 65.9(12.7)               | 0.0081         |
| <40                                       | 195 (2.3)               | 213 (2.2)                | <0.0001        |
| 40-49                                     | 910 (10.9)              | 891 (9.2)                |                |
| 50-59                                     | 1600 (19.1)             | 1816 (18.7)              |                |
| 60-69                                     | 2090 (25.0)             | 2674 (27.6)              |                |
| 70-79                                     | 2431 (29.0)             | 2590 (26.7)              |                |
| ≥80                                       | 1144 (13.7)             | 1520 (15.7)              |                |
| <b>Han</b>                                | 7701 (92.0)             | 9285 (95.7)              | <0.0001        |
| <b>Married</b>                            | 7460 (89.1)             | 8740 (90.1)              | 0.0391         |
| <b>Having medical insurance</b>           | 5126 (61.2)             | 7507 (77.4)              | <0.0001        |
| <b>Admission at cardiology department</b> | 4087 (48.8)             | 6532 (67.3)              | <0.0001        |
| <b>Admission Diagnosis</b>                |                         |                          |                |
| Cardiac arrest                            | 6 (0.1)                 | 18 (0.2)                 | 0.0362         |
| <b>Discharge Diagnosis</b>                |                         |                          |                |

|                                    |             |             |         |
|------------------------------------|-------------|-------------|---------|
| STEMI                              | 5509 (65.8) | 4753 (49.0) | <0.0001 |
| Acute extensive anterior MI        | 967 (11.6)  | 769 (7.9)   | <0.0001 |
| Acute anterior MI                  | 1504 (18.0) | 1310 (13.5) | <0.0001 |
| Acute anterior intermural MI       | 587 (7.0)   | 408 (4.2)   | <0.0001 |
| Acute inferior MI                  | 2558 (30.6) | 2214 (22.8) | <0.0001 |
| Acute lateral MI                   | 359 (4.3)   | 311 (3.2)   | 0.0001  |
| Acute posterior MI                 | 699 (8.4)   | 502 (5.2)   | <0.0001 |
| Acute right ventricular infarction | 615 (7.3)   | 418 (4.3)   | <0.0001 |
| Hypertension                       | 3894 (46.5) | 5080 (52.3) | <0.0001 |
| Diabetes mellitus                  | 1650 (19.7) | 2345 (24.2) | <0.0001 |
| Dyslipidemia                       | 836 (10.0)  | 1434 (14.8) | <0.0001 |
| Cardiogenic shock                  | 403 (4.8)   | 510 (5.3)   | 0.1773  |
| Heart failure                      | 2853 (34.1) | 3793 (39.1) | <0.0001 |
| Stroke                             | 655 (7.8)   | 1389 (14.3) | <0.0001 |
| Renal failure                      | 259 (3.1)   | 684 (7.0)   | <0.0001 |

\*MI: myocardial infarction; STEMI: ST-segment elevation myocardial infarction

**Table 2. Performance of the MRFP model and the complete medical record model**

| Model                                | N    | Discrimination       |                                                          | Calibration                            |
|--------------------------------------|------|----------------------|----------------------------------------------------------|----------------------------------------|
|                                      |      | Area under ROC curve | Predictive Ability* (mean rate of lowest/highest decile) | Calibration Indices (slope, intercept) |
| <b>MRFP model</b>                    |      |                      |                                                          |                                        |
| Year 2011(modelling cohort)          | 8370 | 0.776                | 0.83%-26.88%                                             | (0.909,0.007)                          |
| Year 2015(validation cohort)         | 9704 | 0.794                | 1.00%-29.72%                                             | (0.933,0.005)                          |
| <b>Complete medical record model</b> |      |                      |                                                          |                                        |
| Year 2011(modelling cohort)          | 8370 | 0.790                | 0.51%-27.96%                                             | (0.940,0.004)                          |
| Year 2015(validation cohort)         | 9704 | 0.798                | 0.92%-28.69%                                             | (0.927,0.005)                          |

\*observed rates in deciles determined by estimated model

ROC: receiver operating characteristic; MRFP: medical record front page.



## FIGURE LEGENDS

**Figure 1. Analysis roadmap**

**Figure 2. Odds ratios of MRFP model and complete medical record model based on modelling and validation cohorts.**

(a) MRFP model (b) Complete medical record model

MRFP: medical record front page.

**Figure 3. Correlation of risk standardized mortality rate estimated by MRFP model and complete medical record model.**

(a) Modelling cohort (b) Validation cohort

MRFP: medical record front page.

**MEDICAL RECORD FIRST PAGE DATA**

**COMPLETE MEDICAL RECORD DATA**

YEAR 2011 (Modelling Cohort)

YEAR 2015 (Validation Cohort)

**Select candidate variables**  
clinical knowledge, article summary, backward method of logistic model

**Fit logistic regression model(model 1)**  
using above selected variables

**Model evaluation**  
discrimination and calibration ability  
compare with logistic model only using age and sex

**Fit HGLM model(model 2)**  
using selected covariates, hospital level random effect  
achieve the estimated RSMR of modelling cohort

**Select candidate variables**  
clinical knowledge, article summary, backward method of logistic model

**Model evaluation**  
discrimination and calibration ability

**Fit HGLM model(model 3)**  
using selected covariates, hospital level random effect  
achieve the RSMR of modelling cohort

**Evaluating HGLM result**  
absolute differences between model 2 and model 3  
regression model using RSMR from model 3 as dependent variable and RSMR from model 2 as the independent variable

**Evaluating overfitting of model 1**  
apply model 1 to validation cohort to get the mortality probability of patients  
fit a logistic model using observed outcome as dependent variable and predicted value as independent variable

**Evaluating stability of model 1**  
apply select covariates to validation cohort and re-estimate logistic model  
discrimination and calibration ability

**Fit HGLM model(model 4)**  
using selected covariates, hospital level random effect  
achieve the estimated RSMR of validation cohort

**Fit HGLM model(model 5)**  
using selected covariates, hospital level as random effect  
achieve the RSMR of validation cohort

**Evaluating HGLM result**  
absolute differences between model 4 and model 5  
regression model using RSMR from model 5 as dependent variable and RSMR from model 4 as the independent variable

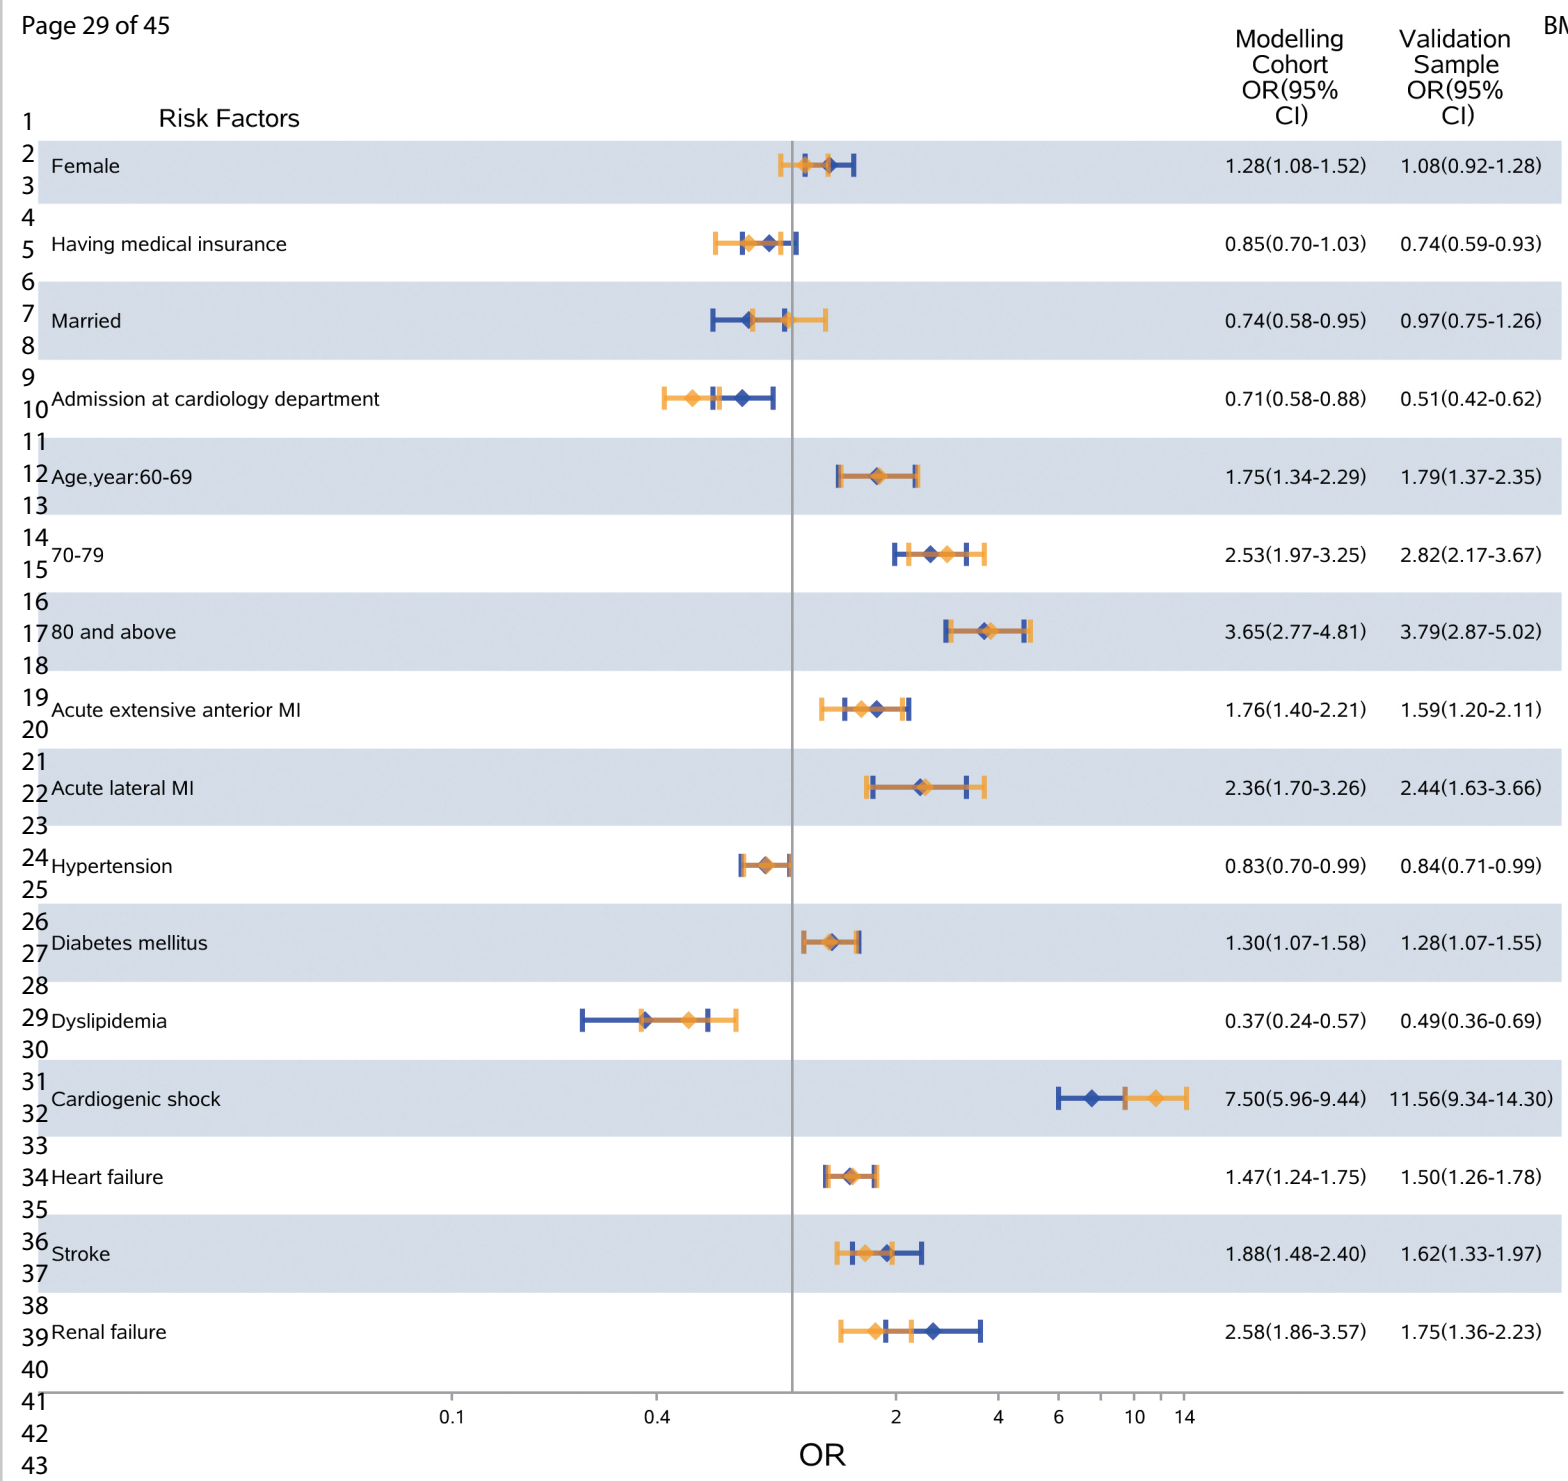

44Note: Blue for modelling sample, orange for validation sample.  
 45Estimatd of between-hospital variance=0.592(SE=0.125) in derivation sample, and 0.773(SE=0.147) in validation sample.  
 For peer review only - <http://bmjopen.bmj.com/site/about/guidelines.xhtml>

(a)

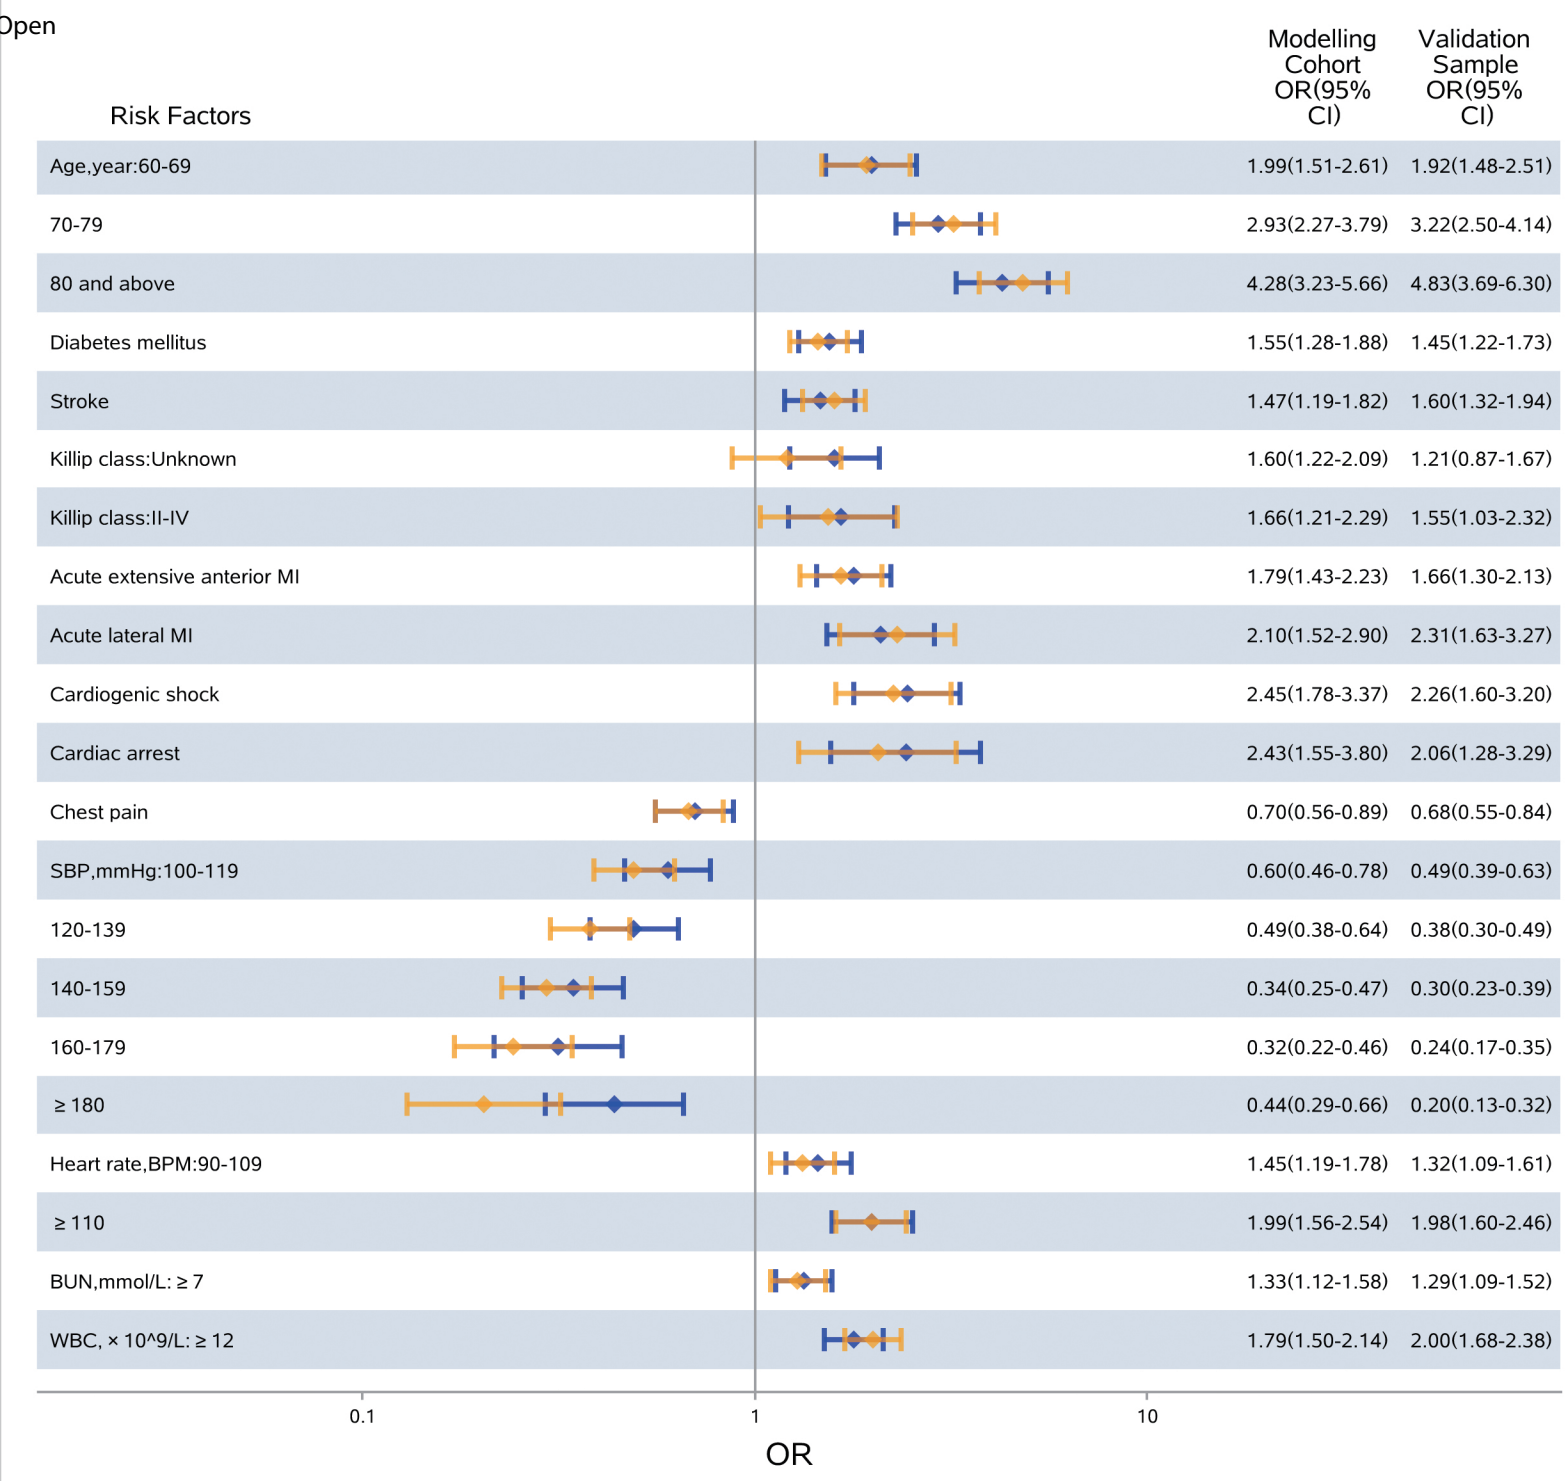

Note:Blue for derivation sample, orange for validation sample.  
 Estimatd of between-hospital variance=0.558(SE=0.121) in derivation sample, and 0.719(SE=0.139) in validation sample.

(b)

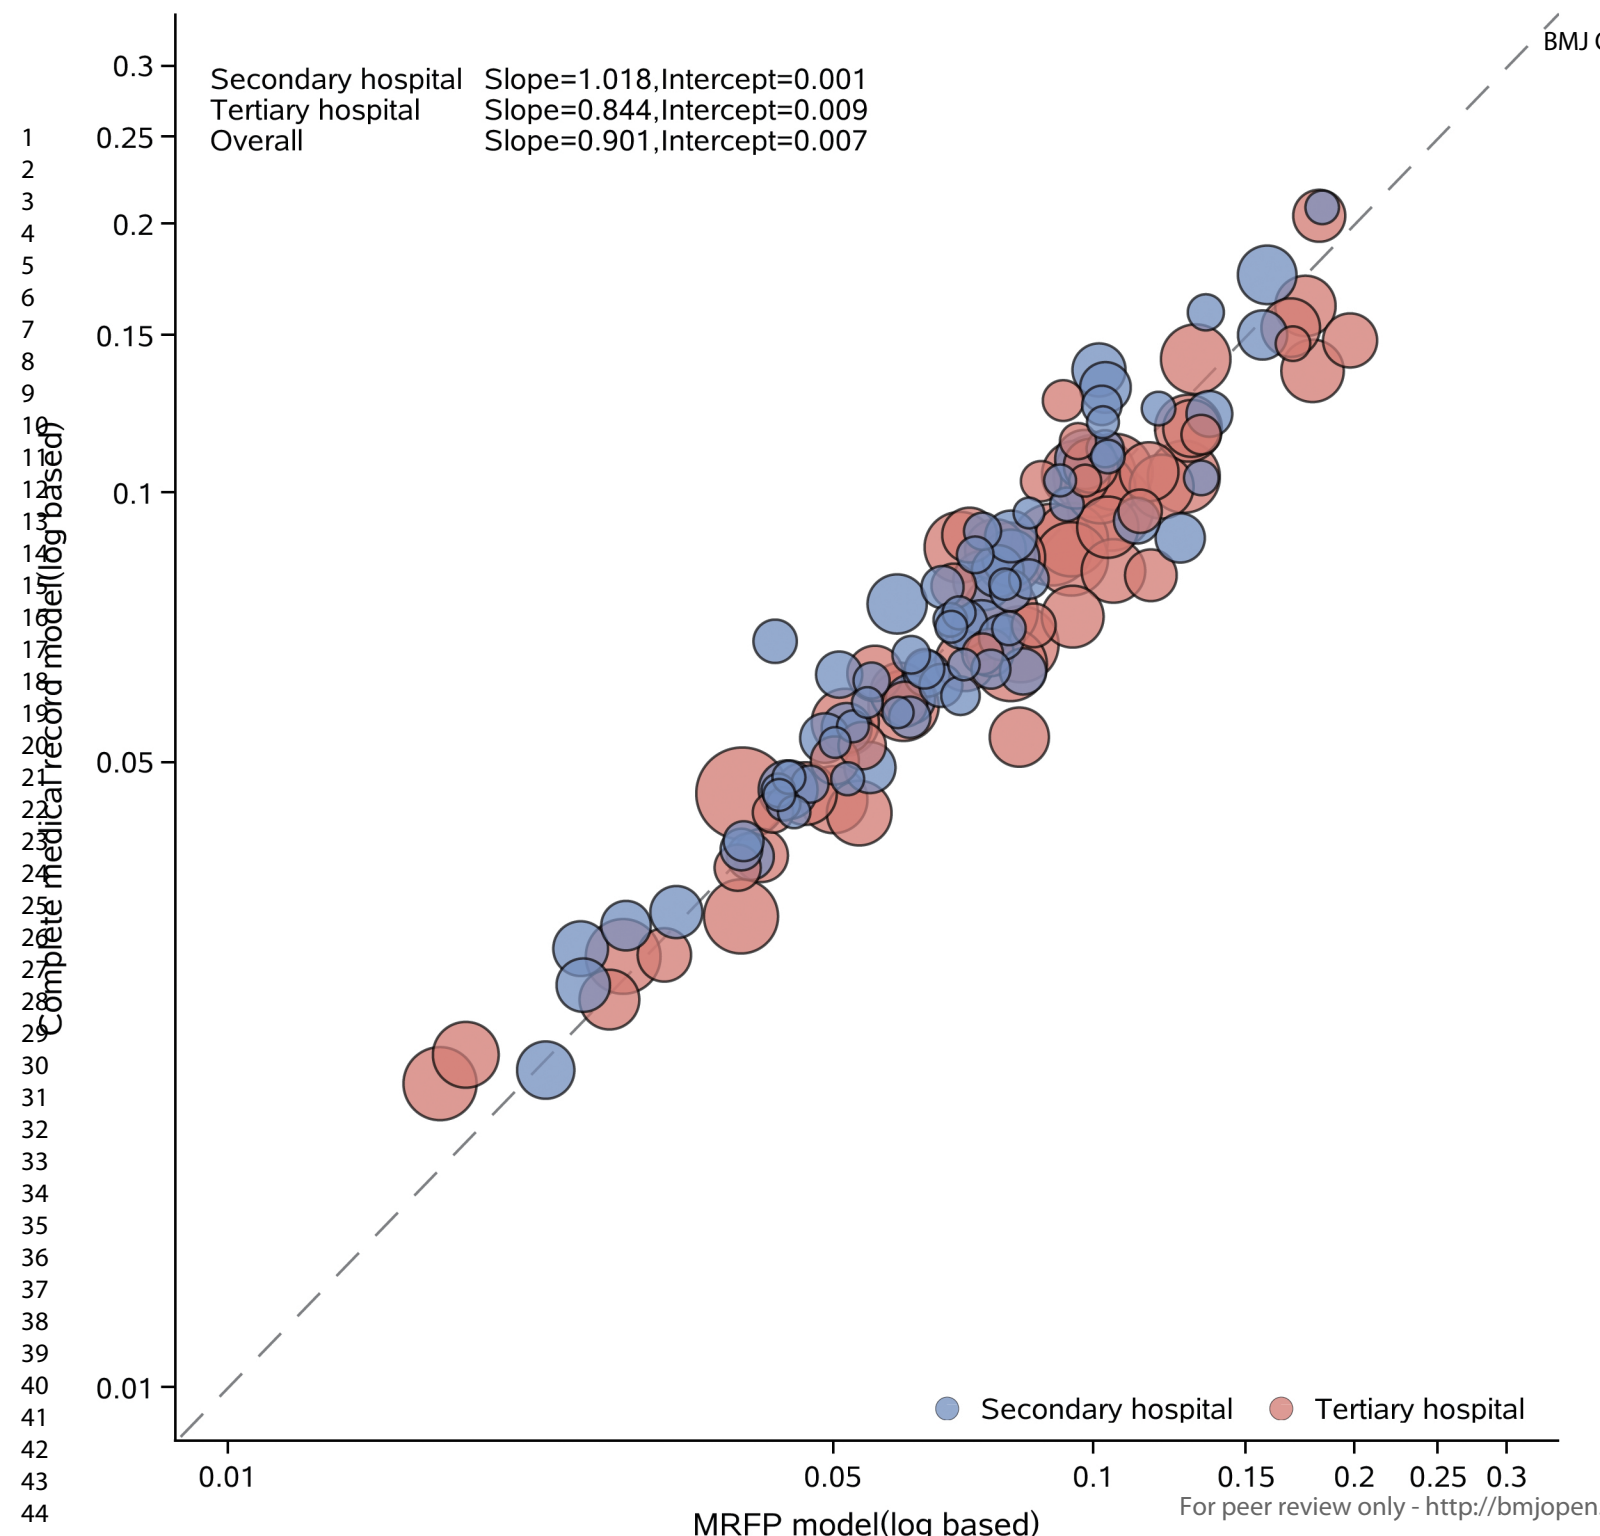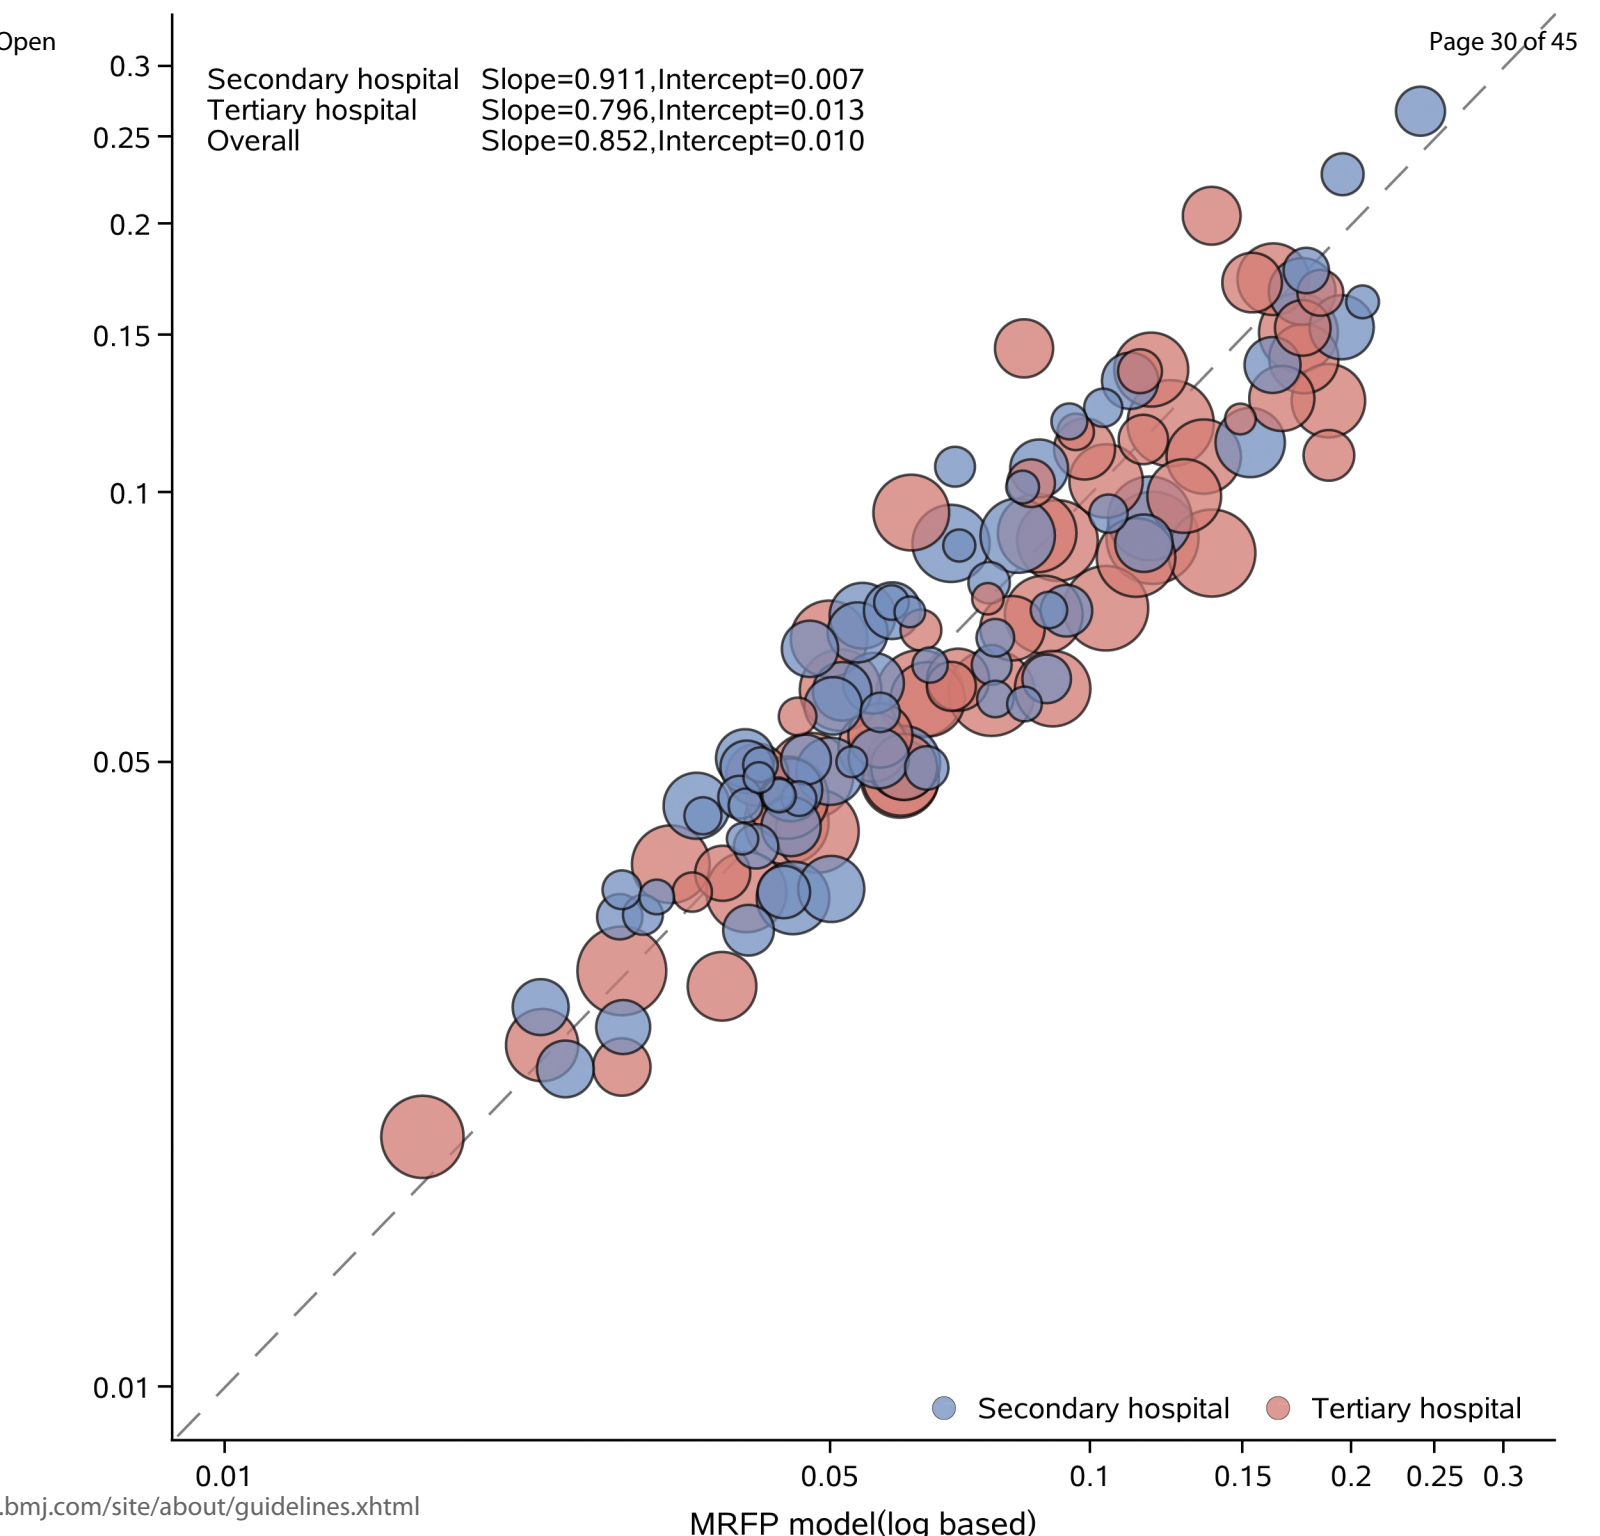

(a)

(b)

1  
2  
3  
4  
5  
6  
7  
8  
9  
10  
11  
12  
13  
14  
15  
16  
17  
18  
19  
20  
21  
22  
23  
24  
25  
26  
27  
28  
29  
30  
31  
32  
33  
34  
35  
36  
37  
38  
39  
40  
41  
42  
43  
44  
45  
46  
47  
48  
49  
50  
51  
52  
53  
54  
55  
56  
57  
58  
59  
60

**Supplementary materials**

For peer review only



**Table S1. Data elements required in the HQMS system**

| No. | Data element                               | Field name | Data type  | Length | Required | Remarks             |
|-----|--------------------------------------------|------------|------------|--------|----------|---------------------|
| 1   | Hospital ID                                | P900       | Character  | 22     | Yes      |                     |
| 2   | Hospital name                              | P6891      | Character  | 80     | Yes      |                     |
| 3   | Medical Insurance Number                   | P686       | Character  | 50     |          |                     |
| 4   | Health-card number                         | P800       | Character  | 50     |          |                     |
| 5   | Method of healthcare payment               | P1         | Character  | 1      | Yes      |                     |
| 6   | Admission times                            | P2         | Number     | 3      | Yes      |                     |
| 7   | Medical record number                      | P3         | Character  | 20     | Yes      |                     |
| 8   | Name                                       | P4         | Character  | 40     |          |                     |
| 9   | Gender                                     | P5         | Character  | 1      | Yes      |                     |
| 10  | Birth date                                 | P6         | Date       |        |          | yyyy-mm-dd          |
| 11  | Age                                        | P7         | Number     | 3      |          | Unit (year)         |
| 12  | Marital status                             | P8         | Character  | 1      | Yes      |                     |
| 13  | Occupation                                 | P9         | Character  | 2      |          |                     |
| 14  | Birthplace (province)                      | P101       | Character  | 30     |          |                     |
| 15  | Birthplace (city)                          | P102       | Character  | 30     |          |                     |
| 16  | Birthplace (county)                        | P103       | Character  | 30     |          |                     |
| 17  | Ethnicity                                  | P11        | Character  | 20     |          |                     |
| 18  | Nationality                                | P12        | Character  | 40     |          |                     |
| 19  | Social ID                                  | P13        | Character  | 18     |          |                     |
| 20  | Residence                                  | P801       | Character  | 200    |          |                     |
| 21  | Residential phone number                   | P802       | Character  | 40     |          |                     |
| 22  | Postcode of residence                      | P803       | Character  | 6      |          |                     |
| 23  | Name and address of employer               | P14        | Character  | 200    |          |                     |
| 24  | Phone number                               | P15        | Character  | 40     |          |                     |
| 25  | Postcode of employer address               | P16        | Character  | 6      |          |                     |
| 26  | “Hukou” address                            | P17        | Character  | 200    |          |                     |
| 27  | Postcode of "Hukou" address                | P171       | Character  | 6      |          |                     |
| 28  | Name of the contact                        | P18        | Character  | 20     |          |                     |
| 29  | Relationship with the patient              | P19        | Character  | 40     |          |                     |
| 30  | Address of the contact                     | P20        | Character  | 200    |          |                     |
| 31  | Admission path                             | P804       | Character  | 1      |          |                     |
| 32  | Phone number of the contact                | P21        | Character  | 30     |          |                     |
| 33  | Admission date                             | P22        | Date, time |        | Yes      | yyyy-mm-dd HH:mm:ss |
| 34  | Department of admission                    | P23        | Character  | 6      | Yes      |                     |
| 35  | Ward of admission                          | P231       | Character  | 30     |          |                     |
| 36  | Department of patient being transferred to | P24        | Character  | 6      |          |                     |
| 37  | Discharge date                             | P25        | Date, time |        | Yes      | yyyy-mm-dd HH:mm:ss |
| 38  | Department of discharge                    | P26        | Character  | 6      | Yes      |                     |

|    |                                                    |       |           |     |     |                                                                    |
|----|----------------------------------------------------|-------|-----------|-----|-----|--------------------------------------------------------------------|
| 39 | Ward of discharge                                  | P261  | Character | 30  |     |                                                                    |
| 40 | Length of hospitalization                          | P27   | Number    | 6   | Yes |                                                                    |
| 41 | Diagnosis code of out-patient/emergency department | P28   | Character | 20  |     | Diagnosis code: ICD10                                              |
| 42 | Diagnosis of out-patient/emergency department      | P281  | Character | 100 | Yes |                                                                    |
| 43 | Admission status                                   | P29   | Character | 1   |     |                                                                    |
| 44 | Admission diagnosis code                           | P30   | Character | 30  |     | Diagnosis code: ICD10                                              |
| 45 | Admission diagnosis                                | P301  | Character | 100 |     |                                                                    |
| 46 | Date of diagnosis being confirmed                  | P31   | Date      |     |     | yyyy-mm-dd                                                         |
| 47 | Code of main diagnosis                             | P321  | Character | 20  | Yes | Diagnosis code: ICD10. If there's no appropriate one, fill in "NA" |
| 48 | Primary diagnosis                                  | P322  | Character | 100 | Yes |                                                                    |
| 49 | Primary diagnosis: admission status                | P805  | Character | 1   |     |                                                                    |
| 50 | Primary diagnosis: discharge status                | P323  | Character | 1   |     |                                                                    |
| 51 | Code of other diagnosis 1                          | P324  | Character | 20  |     | Diagnosis code: ICD10                                              |
| 52 | Other diagnosis 1                                  | P325  | Character | 100 |     |                                                                    |
| 53 | Other diagnosis 1: admission status                | P806  | Character | 1   |     |                                                                    |
| 54 | Other diagnosis 1: discharge status                | P326  | Character | 1   |     |                                                                    |
| 55 | Code of Other diagnosis 2                          | P327  | Character | 20  |     | Diagnosis code: ICD10                                              |
| 56 | Other diagnosis 2                                  | P328  | Character | 100 |     |                                                                    |
| 57 | Other diagnosis 2: admission status                | P807  | Character | 1   |     |                                                                    |
| 58 | Other diagnosis 2: discharge status                | P329  | Character | 1   |     |                                                                    |
| 59 | Code of Other diagnosis 3                          | P3291 | Character | 20  |     | Diagnosis code: ICD10                                              |
| 60 | Other diagnosis 3                                  | P3292 | Character | 100 |     |                                                                    |
| 61 | Other diagnosis 3: admission status                | P808  | Character | 1   |     |                                                                    |
| 62 | Other diagnosis 3: discharge status                | P3293 | Character | 1   |     |                                                                    |
| 63 | Code of Other diagnosis 4                          | P3294 | Character | 20  |     | Diagnosis code: ICD10                                              |
| 64 | Other diagnosis 4                                  | P3295 | Character | 100 |     |                                                                    |
| 65 | Other diagnosis 4: admission status                | P809  | Character | 1   |     |                                                                    |
| 66 | Other diagnosis 4: discharge status                | P3296 | Character | 1   |     |                                                                    |

|    |                                      |       |           |     |  |                       |
|----|--------------------------------------|-------|-----------|-----|--|-----------------------|
| 67 | Code of Other diagnosis 5            | P3297 | Character | 20  |  | Diagnosis code: ICD10 |
| 68 | Other diagnosis 5                    | P3298 | Character | 100 |  |                       |
| 69 | Other diagnosis 5: admission status  | P810  | Character | 1   |  |                       |
| 70 | Other diagnosis 5: discharge status  | P3299 | Character | 1   |  |                       |
| 71 | Code of Other diagnosis 6            | P3281 | Character | 20  |  | Diagnosis code: ICD10 |
| 72 | Other diagnosis 6                    | P3282 | Character | 100 |  |                       |
| 73 | Other diagnosis 6: admission status  | P811  | Character | 1   |  |                       |
| 74 | Other diagnosis 6: discharge status  | P3283 | Character | 1   |  |                       |
| 75 | Code of Other diagnosis 7            | P3284 | Character | 20  |  | Diagnosis code: ICD10 |
| 76 | Other diagnosis 7                    | P3285 | Character | 100 |  |                       |
| 77 | Other diagnosis 7: admission status  | P812  | Character | 1   |  |                       |
| 78 | Other diagnosis 7: discharge status  | P3286 | Character | 1   |  |                       |
| 79 | Code of Other diagnosis 8            | P3287 | Character | 20  |  | Diagnosis code: ICD10 |
| 80 | Other diagnosis 8                    | P3288 | Character | 100 |  |                       |
| 81 | Other diagnosis 8: admission status  | P813  | Character | 1   |  |                       |
| 82 | Other diagnosis 8: discharge status  | P3289 | Character | 1   |  |                       |
| 83 | Code of Other diagnosis 9            | P3271 | Character | 20  |  | Diagnosis code: ICD10 |
| 84 | Other diagnosis 9                    | P3272 | Character | 100 |  |                       |
| 85 | Other diagnosis 9: admission status  | P814  | Character | 1   |  |                       |
| 86 | Other diagnosis 9: discharge status  | P3273 | Character | 1   |  |                       |
| 87 | Code of Other diagnosis 10           | P3274 | Character | 20  |  | Diagnosis code: ICD10 |
| 88 | Other diagnosis 10                   | P3275 | Character | 100 |  |                       |
| 89 | Other diagnosis 10: admission status | P815  | Character | 1   |  |                       |
| 90 | Other diagnosis 10: discharge status | P3276 | Character | 1   |  |                       |
| 91 | Frequency of in-hospital infection   | P689  | Number    | 5   |  |                       |
| 92 | Code of pathological diagnosis 1     | P351  | Character | 20  |  | Diagnosis code: ICD10 |
| 93 | Pathological diagnosis 1             | P352  | Character | 100 |  |                       |
| 94 | Pathological number 1                | P816  | Character | 50  |  |                       |



|     |                                                         |      |            |              |  |                       |
|-----|---------------------------------------------------------|------|------------|--------------|--|-----------------------|
| 95  | Code of pathological diagnosis 2                        | P353 | Character  | 20           |  | Diagnosis code: ICD10 |
| 96  | Pathological diagnosis 2                                | P354 | Character  | 100          |  |                       |
| 97  | Pathological number 2                                   | P817 | Character  | 50           |  |                       |
| 98  | Code of pathological diagnosis 3                        | P355 | Character  | 20           |  | Diagnosis code: ICD10 |
| 99  | Pathological diagnosis 3                                | P356 | Character  | 100          |  |                       |
| 100 | Pathological number 3                                   | P818 | Character  | 50           |  |                       |
| 101 | External factors' code of trauma and poisoning 1        | P361 | Character  | 20           |  | Diagnosis code: ICD10 |
| 102 | External factors of trauma and poisoning 1              | P362 | Character  | 100          |  |                       |
| 103 | External factors' code of trauma and poisoning 2        | P363 | Character  | 20           |  | Diagnosis code: ICD10 |
| 104 | External factors of trauma and poisoning 2              | P364 | Character  | 100          |  |                       |
| 105 | External factors' code of trauma and poisoning 3        | P365 | Character  | 20           |  | Diagnosis code: ICD10 |
| 106 | External factors of trauma and poisoning 3              | P366 | Character  | 100          |  |                       |
| 107 | Allergen                                                | P371 | Collection | Multi-choice |  |                       |
| 108 | Allergic drug                                           | P372 | Character  | 100          |  |                       |
| 109 | HBsAg                                                   | P38  | Character  | 1            |  |                       |
| 110 | HCV-Ab                                                  | P39  | Character  | 1            |  |                       |
| 111 | HIV-Ab                                                  | P40  | Character  | 1            |  |                       |
| 112 | Coincidence between out-patient and discharge diagnosis | P411 | Character  | 1            |  |                       |
| 113 | Coincidence between admitting and discharge diagnosis   | P412 | Character  | 1            |  |                       |
| 114 | Coincidence between pre- and post-operation diagnosis   | P413 | Character  | 1            |  |                       |
| 115 | Coincidence between clinical and pathological diagnosis | P414 | Character  | 1            |  |                       |
| 116 | Coincidence between radial and pathological diagnosis   | P415 | Character  | 3            |  |                       |
| 117 | Rescue times                                            | P421 | Number     | 3            |  |                       |
| 118 | Succeeding rescue times                                 | P422 | Number     | 1            |  |                       |
| 119 | Strongest evidence of diagnosis                         | P687 | Character  | 1            |  |                       |
| 120 | Differentiation degree                                  | P688 | Character  | 40           |  |                       |
| 121 | Chief                                                   | P431 | Character  | 40           |  |                       |
| 122 | (Associate) chief physician                             | P432 | Character  | 40           |  |                       |
| 123 | Attending physician                                     | P433 | Character  | 40           |  |                       |

|     |                                  |       |            |     |                                         |                       |
|-----|----------------------------------|-------|------------|-----|-----------------------------------------|-----------------------|
| 124 | Resident                         | P434  | Character  | 40  |                                         |                       |
| 125 | Primary nurse                    | P819  | Character  | 40  |                                         |                       |
| 126 | Refresher physician              | P435  | Character  | 40  |                                         |                       |
| 127 | Postgraduate intern              | P436  | Character  | 40  |                                         |                       |
| 128 | Intern                           | P437  | Character  | 40  |                                         |                       |
| 129 | Coder                            | P438  | Character  | 40  |                                         |                       |
| 130 | Medical record quality           | P44   | Character  | 1   |                                         |                       |
| 131 | Quality-control physician        | P45   | Character  | 40  |                                         |                       |
| 132 | Quality-control primary nurse    | P46   | Character  | 40  |                                         |                       |
| 133 | Quality-control date             | P47   | Date       |     |                                         | yyyy-mm-dd            |
| 134 | Operation / Procedure code 1     | P490  | Character  | 20  |                                         | Diagnosis code: ICD10 |
| 135 | Operation / Procedure date 1     | P491  | Date, time |     | Obligated if operation code isn't empty | yyyy-mm-dd HH:mm:ss   |
| 136 | Operation / Procedure level 1    | P820  | Character  | 1   |                                         |                       |
| 137 | Operation / Procedure name 1     | P492  | Character  | 100 | Obligated if operation code isn't empty |                       |
| 138 | Operation / Procedure part 1     | P493  | Character  | 4   |                                         |                       |
| 139 | Operation / Procedure duration 1 | P494  | Number     | 5   |                                         | Unit (hour)           |
| 140 | Surgeon 1                        | P495  | Character  | 40  |                                         |                       |
| 141 | First assistant 1                | P496  | Character  | 40  |                                         |                       |
| 142 | Second assistant 1               | P497  | Character  | 40  |                                         |                       |
| 143 | Anaesthesia 1                    | P498  | Character  | 6   |                                         |                       |
| 144 | Anaesthesia class 1              | P4981 | Character  | 1   |                                         |                       |
| 145 | Wound healing ratings 1          | P499  | Character  | 2   |                                         |                       |
| 146 | Anaesthesiologist 1              | P4910 | Character  | 40  |                                         |                       |
| 147 | Operation / Procedure code 2     | P4911 | Character  | 20  |                                         | Diagnosis code: ICD10 |
| 148 | Operation / Procedure date 2     | P4912 | Date, time |     |                                         | yyyy-mm-dd HH:mm:ss   |
| 149 | Operation / Procedure level 2    | P821  | Character  | 1   |                                         |                       |
| 150 | Operation / Procedure name 2     | P4913 | Character  | 100 |                                         |                       |
| 151 | Operation / Procedure part 2     | P4914 | Character  | 4   |                                         |                       |
| 152 | Operation / Procedure duration 2 | P4915 | Number     | 5   |                                         | Unit (hour)           |
| 153 | Surgeon 2                        | P4916 | Character  | 40  |                                         |                       |
| 154 | First assistant 2                | P4917 | Character  | 40  |                                         |                       |
| 155 | Second assistant 2               | P4918 | Character  | 40  |                                         |                       |
| 156 | Anaesthesia 2                    | P4919 | Character  | 6   |                                         |                       |
| 157 | Anaesthesia class 2              | P4982 | Character  | 1   |                                         |                       |
| 158 | Wound healing ratings 2          | P4920 | Character  | 2   |                                         |                       |

|     |                                     |       |            |     |  |                       |
|-----|-------------------------------------|-------|------------|-----|--|-----------------------|
| 159 | Anaesthesiologist 2                 | P4921 | Character  | 40  |  |                       |
| 160 | Operation / Procedure code 3        | P4922 | Character  | 20  |  | Diagnosis code: ICD10 |
| 161 | Operation / Procedure date 3        | P4923 | Date, time |     |  | yyyy-mm-dd HH:mm:ss   |
| 162 | Operation / Procedure level 3       | P822  | Character  | 1   |  |                       |
| 163 | Operation / Procedure name 3        | P4924 | Character  | 100 |  |                       |
| 164 | Operation / Procedure part 3        | P4925 | Character  | 4   |  |                       |
| 165 | Operation / Procedure duration<br>3 | P4526 | Number     | 5   |  | Unit (hour)           |
| 166 | Surgeon 3                           | P4527 | Character  | 40  |  |                       |
| 167 | First assistant 3                   | P4528 | Character  | 40  |  |                       |
| 168 | Second assistant 3                  | P4529 | Character  | 40  |  |                       |
| 169 | Anaesthesia 3                       | P4530 | Character  | 6   |  |                       |
| 170 | Anaesthesia class 3                 | P4983 | Character  | 1   |  |                       |
| 171 | Wound healing ratings 3             | P4531 | Character  | 2   |  |                       |
| 172 | Anaesthesiologist 3                 | P4532 | Character  | 40  |  |                       |
| 173 | Operation / Procedure code 4        | P4533 | Character  | 20  |  | Diagnosis code: ICD10 |
| 174 | Operation / Procedure date 4        | P4534 | Date, time |     |  | yyyy-mm-dd HH:mm:ss   |
| 175 | Operation / Procedure level 4       | P823  | Character  | 1   |  |                       |
| 176 | Operation / Procedure name 4        | P4535 | Character  | 100 |  |                       |
| 177 | Operation / Procedure part 4        | P4536 | Character  | 4   |  |                       |
| 178 | Operation / Procedure duration<br>4 | P4537 | Number     | 5   |  | Unit (hour)           |
| 179 | Surgeon 4                           | P4538 | Character  | 40  |  |                       |
| 180 | First assistant 4                   | P4539 | Character  | 40  |  |                       |
| 181 | Second assistant 4                  | P4540 | Character  | 40  |  |                       |
| 182 | Anaesthesia 4                       | P4541 | Character  | 6   |  |                       |
| 183 | Anaesthesia class 4                 | P4542 | Character  | 1   |  |                       |
| 184 | Wound healing ratings 4             | P4543 | Character  | 2   |  |                       |
| 185 | Anaesthesiologist 4                 | P4544 | Character  | 40  |  |                       |
| 186 | Operation / Procedure code 5        | P4545 | Date, time | 20  |  | Diagnosis code: ICD10 |
| 187 | Operation / Procedure date 5        | P4546 | Character  |     |  | yyyy-mm-dd HH:mm:ss   |
| 188 | Operation / Procedure level 5       | P824  | Character  | 1   |  |                       |
| 189 | Operation / Procedure name 5        | P4546 | Character  | 100 |  |                       |
| 190 | Operation / Procedure part 5        | P4547 | Character  | 4   |  |                       |
| 191 | Operation / Procedure duration<br>5 | P4548 | Number     | 5   |  | Unit (hour)           |
| 192 | Surgeon 5                           | P4549 | Character  | 40  |  |                       |
| 193 | First assistant 5                   | P4550 | Character  | 40  |  |                       |
| 194 | Second assistant 5                  | P4551 | Character  | 40  |  |                       |
| 195 | Anaesthesia 5                       | P4552 | Character  | 6   |  |                       |
| 196 | Anaesthesia class 5                 | P4985 | Character  | 1   |  |                       |
| 197 | Wound healing ratings 5             | P4553 | Character  | 2   |  |                       |
| 198 | Anaesthesiologist 5                 | P4554 | Character  | 40  |  |                       |

|     |                                     |        |            |     |  |                       |
|-----|-------------------------------------|--------|------------|-----|--|-----------------------|
| 199 | Operation / Procedure code 6        | P45002 | Character  | 20  |  | Diagnosis code: ICD10 |
| 200 | Operation / Procedure date 6        | P45003 | Date, time |     |  | yyyy-mm-dd HH:mm:ss   |
| 201 | Operation / Procedure level 6       | P825   | Character  | 1   |  |                       |
| 202 | Operation / Procedure name 6        | P45004 | Character  | 100 |  |                       |
| 203 | Operation / Procedure part 6        | P45005 | Character  | 4   |  |                       |
| 204 | Operation / Procedure duration<br>6 | P45006 | Number     | 5   |  | Unit (hour)           |
| 205 | Surgeon 6                           | P45007 | Character  | 40  |  |                       |
| 206 | First assistant 6                   | P45008 | Character  | 40  |  |                       |
| 207 | Second assistant 6                  | P45009 | Character  | 40  |  |                       |
| 208 | Anaesthesia 6                       | P45010 | Character  | 6   |  |                       |
| 209 | Anaesthesia class 6                 | P45011 | Character  | 1   |  |                       |
| 210 | Wound healing ratings 6             | P45012 | Character  | 2   |  |                       |
| 211 | Anaesthesiologist 6                 | P45013 | Character  | 40  |  |                       |
| 212 | Operation / Procedure code 7        | P45014 | Character  | 20  |  | Diagnosis code: ICD10 |
| 213 | Operation / Procedure date 7        | P45015 | Date, time |     |  | yyyy-mm-dd HH:mm:ss   |
| 214 | Operation / Procedure level 7       | P826   | Character  | 1   |  |                       |
| 215 | Operation / Procedure name 7        | P45016 | Character  | 100 |  |                       |
| 216 | Operation / Procedure part 7        | P45017 | Number     | 4   |  |                       |
| 217 | Operation / Procedure duration<br>7 | P45018 | Character  | 5   |  | Unit (hour)           |
| 218 | Surgeon 7                           | P45019 | Character  | 40  |  |                       |
| 219 | First assistant 7                   | P45020 | Character  | 40  |  |                       |
| 220 | Second assistant 7                  | P45021 | Character  | 40  |  |                       |
| 221 | Anaesthesia 7                       | P45022 | Character  | 6   |  |                       |
| 222 | Anaesthesia class 7                 | P45023 | Character  | 1   |  |                       |
| 223 | Wound healing ratings 7             | P45024 | Character  | 2   |  |                       |
| 224 | Anaesthesiologist 7                 | P45025 | Character  | 40  |  |                       |
| 225 | Operation / Procedure code 8        | P45026 | Character  | 20  |  | Diagnosis code: ICD10 |
| 226 | Operation / Procedure date 8        | P45027 | Date, time |     |  | yyyy-mm-dd HH:mm:ss   |
| 227 | Operation / Procedure level 8       | P827   | Character  | 1   |  |                       |
| 228 | Operation / Procedure name 8        | P45028 | Character  | 100 |  |                       |
| 229 | Operation / Procedure part 8        | P45029 | Character  | 4   |  |                       |
| 230 | Operation / Procedure duration<br>8 | P45030 | Number     | 5   |  | Unit (hour)           |
| 231 | Surgeon 8                           | P45031 | Character  | 40  |  |                       |
| 232 | First assistant 8                   | P45032 | Character  | 40  |  |                       |
| 233 | Second assistant 8                  | P45033 | Character  | 40  |  |                       |
| 234 | Anaesthesia 8                       | P45034 | Character  | 6   |  |                       |
| 235 | Anaesthesia class 8                 | P45035 | Character  | 1   |  |                       |
| 236 | Wound healing ratings 8             | P45036 | Character  | 2   |  |                       |
| 237 | Anaesthesiologist 8                 | P45037 | Character  | 40  |  |                       |
| 238 | Operation / Procedure code 9        | P45038 | Character  | 20  |  | Diagnosis code: ICD10 |

|     |                                   |        |            |     |  |                       |
|-----|-----------------------------------|--------|------------|-----|--|-----------------------|
| 239 | Operation / Procedure date 9      | P45039 | Date, time |     |  | yyyy-mm-dd HH:mm:ss   |
| 240 | Operation / Procedure level 9     | P828   | Character  | 1   |  |                       |
| 241 | Operation / Procedure name 9      | P45040 | Character  | 100 |  |                       |
| 242 | Operation / Procedure part 9      | P45041 | Character  | 4   |  |                       |
| 243 | Operation / Procedure duration 9  | P45042 | Number     | 5   |  | Unit (hour)           |
| 244 | Surgeon 9                         | P45043 | Character  | 40  |  |                       |
| 245 | First assistant 9                 | P45044 | Character  | 40  |  |                       |
| 246 | Second assistant 9                | P45045 | Character  | 40  |  |                       |
| 247 | Anaesthesia 9                     | P45046 | Character  | 6   |  |                       |
| 248 | Anaesthesia class 9               | P45047 | Character  | 1   |  |                       |
| 249 | Wound healing ratings 9           | P45048 | Character  | 2   |  |                       |
| 250 | Anaesthesiologist 9               | P45049 | Character  | 40  |  |                       |
| 251 | Operation / Procedure code 10     | P45050 | Character  | 20  |  | Diagnosis code: ICD10 |
| 252 | Operation / Procedure date 10     | P45051 | Date, time |     |  | yyyy-mm-dd HH:mm:ss   |
| 253 | Operation / Procedure level 10    | P829   | Character  | 1   |  |                       |
| 254 | Operation / Procedure name 10     | P45052 | Character  | 100 |  |                       |
| 255 | Operation / Procedure part 10     | P45053 | Character  | 4   |  |                       |
| 256 | Operation / Procedure duration 10 | P45054 | Number     | 5   |  | Unit (hour)           |
| 257 | Surgeon 10                        | P45055 | Character  | 40  |  |                       |
| 258 | First assistant 10                | P45056 | Character  | 40  |  |                       |
| 259 | Second assistant 10               | P45057 | Character  | 40  |  |                       |
| 260 | Anaesthesia 10                    | P45058 | Character  | 6   |  |                       |
| 261 | Anaesthesia class 10              | P45059 | Character  | 1   |  |                       |
| 262 | Wound healing ratings 10          | P45060 | Character  | 2   |  |                       |
| 263 | Anaesthesiologist 10              | P45061 | Character  | 40  |  |                       |
| 264 | Length of critical care           | P561   | Number     | 6   |  | Unit (day)            |
| 265 | Length of Grade 1 nursing         | P562   | Number     | 6   |  | Unit (day)            |
| 266 | Length of Grade 2 nursing         | P563   | Number     | 6   |  | Unit (day)            |
| 267 | Length of Grade 3 nursing         | P564   | Number     | 6   |  | Unit (day)            |
| 268 | Intensive care unit 1             | P6911  | Character  | 4   |  |                       |
| 269 | Entrance date and time 1          | P6912  | Date       |     |  | yyyy-mm-dd            |
| 270 | Exit date and time 1              | P6913  | Date       |     |  | yyyy-mm-dd            |
| 271 | Intensive care unit 2             | P6914  | Character  | 4   |  |                       |
| 272 | Entrance date and time 2          | P6915  | Date       |     |  | yyyy-mm-dd            |
| 273 | Exit date and time 2              | P6916  | Date       |     |  | yyyy-mm-dd            |
| 274 | Intensive care unit 3             | P6917  | Character  | 4   |  |                       |
| 275 | Entrance date and time 3          | P6918  | Date       |     |  | yyyy-mm-dd            |
| 276 | Exit date and time 3              | P6919  | Date       |     |  | yyyy-mm-dd            |
| 277 | Intensive care unit 4             | P6920  | Character  | 4   |  |                       |
| 278 | Entrance date and time 4          | P6921  | Date       |     |  | yyyy-mm-dd            |
| 279 | Exit date and time 4              | P6922  | Date       |     |  | yyyy-mm-dd            |

|     |                                                                  |       |            |              |     |                                  |
|-----|------------------------------------------------------------------|-------|------------|--------------|-----|----------------------------------|
| 280 | Intensive care unit 5                                            | P6923 | Character  | 4            |     |                                  |
| 281 | Entrance date and time 5                                         | P6924 | Date       |              |     | yyyy-mm-dd                       |
| 282 | Exit date and time 5                                             | P6925 | Date       |              |     | yyyy-mm-dd                       |
| 283 | Autopsy                                                          | P57   | Character  | 1            |     |                                  |
| 284 | First case of operation, treatment, examination and diagnosis    | P58   | Character  | 1            |     |                                  |
| 285 | Type of the patients with operation                              | P581  | Collection | Multi-choice |     |                                  |
| 286 | Follow-up                                                        | P60   | Character  | 1            |     |                                  |
| 287 | Follow-up time (week)                                            | P611  | Number     | 2            |     |                                  |
| 288 | Follow-up time (month)                                           | P612  | Number     | 2            |     |                                  |
| 289 | Follow-up time (year)                                            | P613  | Number     | 2            |     |                                  |
| 290 | Teach Case                                                       | P59   | Character  | 1            |     |                                  |
| 291 | Blood type (ABO)                                                 | P62   | Character  | 1            | Yes |                                  |
| 292 | Blood type (Rh)                                                  | P63   | Character  | 1            | Yes |                                  |
| 293 | Transfusion reaction                                             | P64   | Character  | 1            |     |                                  |
| 294 | Erythrocyte                                                      | P651  | Number     | 6            |     | Unit (U)                         |
| 295 | Platelet                                                         | P652  | Number     | 6            |     | Unit (bag)                       |
| 296 | Plasma                                                           | P653  | Number     | 6            |     | Unit (ml)                        |
| 297 | Whole blood                                                      | P654  | Number     | 6            |     | Unit (ml)                        |
| 298 | Autologous recovery                                              | P655  | Number     | 6            |     | Unit (ml)                        |
| 299 | Others                                                           | P656  | Number     | 6            |     | Unit (ml)                        |
| 300 | Age (less than 1 years old)                                      | P66   | Number     | 4,2          |     | Unit (month), two decimal places |
| 301 | New-born weight 1                                                | P681  | Number     | 6            |     | Unit (gram)                      |
| 302 | New-born weight 2                                                | P682  | Number     | 6            |     | Unit (gram)                      |
| 303 | New-born weight 3                                                | P683  | Number     | 6            |     | Unit (gram)                      |
| 304 | New-born weight 4                                                | P684  | Number     | 6            |     | Unit (gram)                      |
| 305 | New-born weight 5                                                | P685  | Number     | 6            |     | Unit (gram)                      |
| 306 | New-born weight at admission                                     | P67   | Number     | 6            |     | Unit (gram)                      |
| 307 | Pre-admitting (coma duration of cranial injury patients, hour)   | P731  | Number     | 6            |     | Unit (hour)                      |
| 308 | Pre-admitting (coma duration of cranial injury patients, minute) | P732  | Number     | 2            |     | Unit (min)                       |
| 309 | Post-admitting (coma duration of cranial injury patients, hour)  | P733  | Number     | 6            |     | Unit (hour)                      |
| 310 | Post-admitting coma duration of cranial injury patients, minute) | P734  | Number     | 2            |     | Unit (min)                       |
| 311 | Duration of ventilator application                               | P72   | Number     | 6            |     | Unit (hour)                      |

|     |                                                                                     |      |           |      |     |                    |
|-----|-------------------------------------------------------------------------------------|------|-----------|------|-----|--------------------|
| 312 | Readmission Plan within 31 days after discharge                                     | P830 | Character | 1    |     |                    |
| 313 | Readmission aims                                                                    | P831 | Character | 100  |     |                    |
| 314 | Method of discharge                                                                 | P741 | Character | 1    |     |                    |
| 315 | Hospital from which the patient is transferred                                      | P742 | Character | 100  |     |                    |
| 316 | Community service association/county hospital from which the patient is transferred | P743 | Character | 100  |     |                    |
| 317 | Gross charge                                                                        | P782 | Number    | 10,2 | Yes | Two decimal places |
| 318 | Out-of-pocket money                                                                 | P751 | Number    | 10,2 |     | Two decimal places |
| 319 | Cost for general medical care                                                       | P752 | Number    | 10,2 |     | Two decimal places |
| 320 | Cost for treatment                                                                  | P754 | Number    | 10,2 |     | Two decimal places |
| 321 | Cost for nursing care                                                               | P755 | Number    | 10,2 |     | Two decimal places |
| 322 | Cost for other integrated medical services                                          | P756 | Number    | 10,2 |     | Two decimal places |
| 323 | Cost for pathological diagnosis                                                     | P757 | Number    | 10,2 |     | Two decimal places |
| 324 | Cost for lab text                                                                   | P758 | Number    | 10,2 |     | Two decimal places |
| 325 | Cost for imaging test                                                               | P759 | Number    | 10,2 |     | Two decimal places |
| 326 | Cost for clinical diagnosis items                                                   | P760 | Number    | 10,2 |     | Two decimal places |
| 327 | Cost for nonoperation therapy                                                       | P761 | Number    | 10,2 |     | Two decimal places |
| 328 | Cost for clinical physical treatment                                                | P762 | Number    | 10,2 |     | Two decimal places |
| 329 | Operation-treatment cost                                                            | P763 | Number    | 10,2 |     | Two decimal places |
| 330 | Anaesthesia cost                                                                    | P764 | Number    | 10,2 |     | Two decimal places |
| 331 | Operation cost                                                                      | P765 | Number    | 10,2 |     | Two decimal places |
| 332 | Rehabilitation cost                                                                 | P767 | Number    | 10,2 |     | Two decimal places |
| 333 | Cost for traditional Chinese medicine                                               | P768 | Number    | 10,2 |     | Two decimal places |
| 334 | Cost for western medicine                                                           | P769 | Number    | 10,2 |     | Two decimal places |
| 335 | Cost for Antibiotics                                                                | P770 | Number    | 10,2 |     | Two decimal places |
| 336 | Cost for traditional Chinese medicine                                               | P771 | Number    | 10,2 |     | Two decimal places |
| 337 | Cost for Herbs                                                                      | P772 | Number    | 10,2 |     | Two decimal places |
| 338 | Cost for whole blood transfusion                                                    | P773 | Number    | 10,2 |     | Two decimal places |
| 339 | Cost for blood transfusion                                                          | P774 | Number    | 10,2 |     | Two decimal places |
| 340 | Cost for globin transfusion                                                         | P775 | Number    | 10,2 |     | Two decimal places |
| 341 | Cost for clotting factor transfusion                                                | P776 | Number    | 10,2 |     | Two decimal places |
| 342 | Cost for cytokine transfusion                                                       | P777 | Number    | 10,2 |     | Two decimal places |



|     |                                                     |      |        |      |  |                    |
|-----|-----------------------------------------------------|------|--------|------|--|--------------------|
| 343 | Cost for disposable medical material in examination | P778 | Number | 10,2 |  | Two decimal places |
| 344 | Cost for disposable medical material in treatment   | P779 | Number | 10,2 |  | Two decimal places |
| 345 | Cost for disposable medical material in operation   | P780 | Number | 10,2 |  | Two decimal places |
| 346 | Other cost                                          | P781 | Number | 10,2 |  | Two decimal places |

For peer review only



Figure S1. Flowchart of patients' exclusion

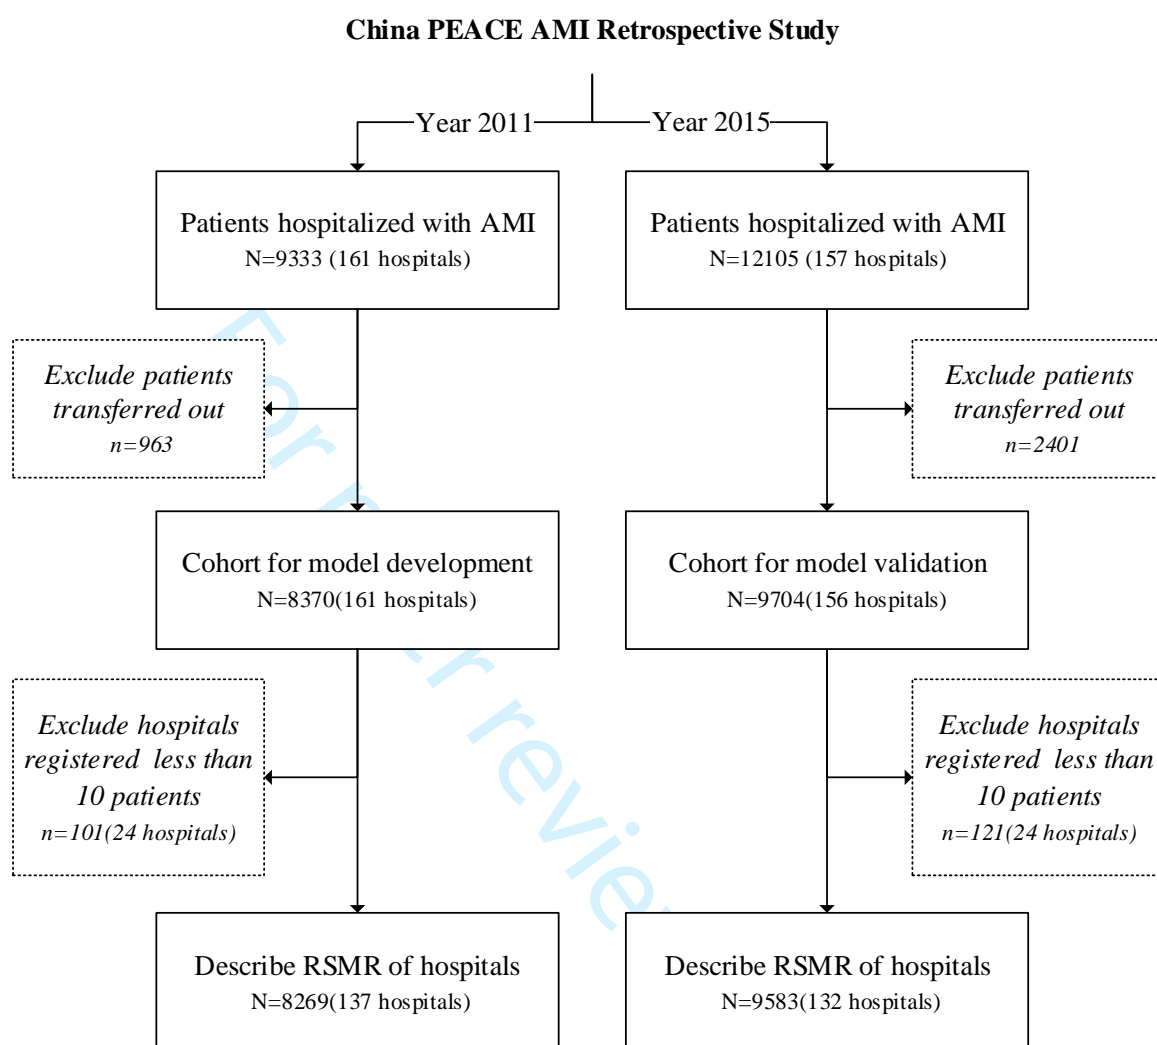

RSMR: risk standardized mortality rate

## Appendix A. Comparison of established risk-perdition model with the GRACE ACS in-hospital mortality model

We calculated the predicted probability of in-hospital death among our development and validation cohorts by 3 models (GRACE ACS model, our complete medical record model and medical record front page model), separately. Then we calculated the AUC of each model and test the statistical difference between GRACE and our models. Integrated discrimination improvement (IDI) was also calculated to evaluate the overall improvement of our models compared with GRACE. Results showed that compared with GRACE ACS model, both our two patient risk prediction models had better AUC (all  $p$  value  $< 0.001$ , see following Figure) and positive IDI among development and validation cohorts. In detail, the IDI of medical record front page model compared with GRACE model was 0.010 (0.003, 0.017) in development cohort, and 0.028 (0.021, 0.036) in validation cohort.

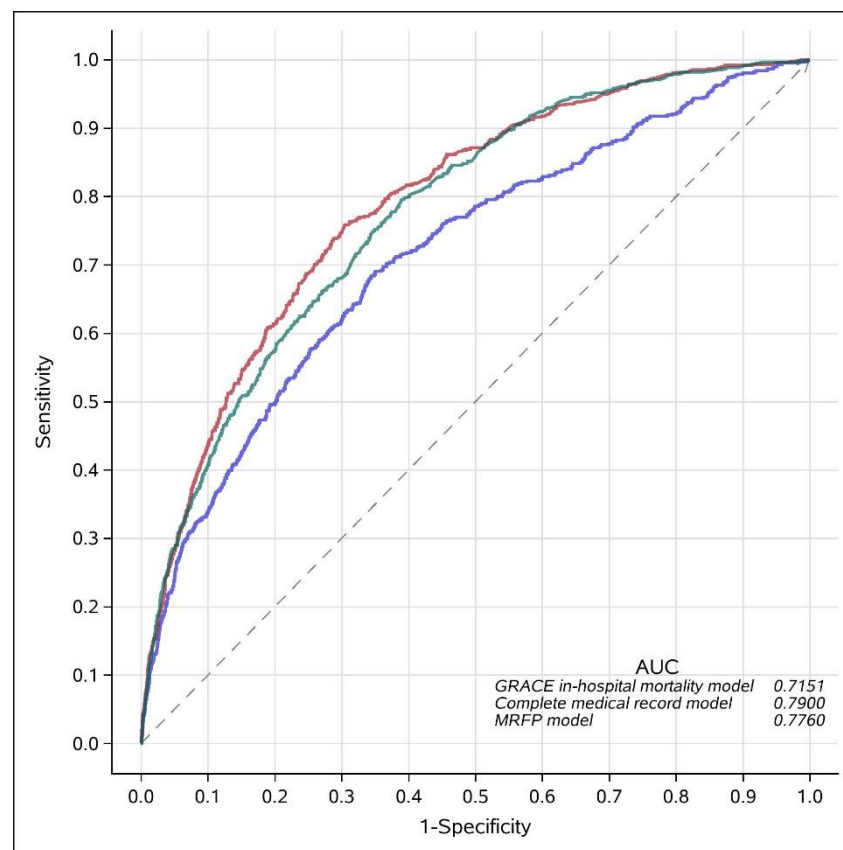

(a)

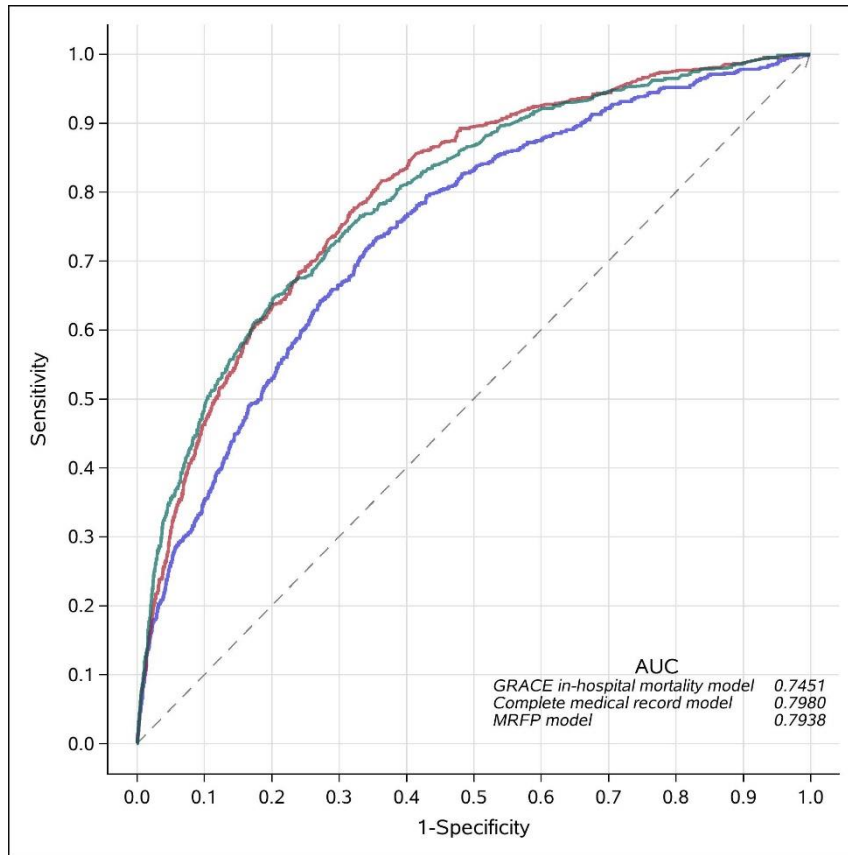

31 **Figure. ROC of 3 models among development(a) and validation(b) cohort.**

32  
33  
34  
35  
36  
37  
38  
39  
40  
41  
42  
43  
44  
45  
46  
47  
48  
49  
50  
51  
52  
53  
54  
55  
56  
57  
58  
59  
60

**Figure S2. Receiver operating characteristic (ROC) curve of MRFP model and complete medical record model based on modelling and validation cohorts.**

MRFP: medical record front page.

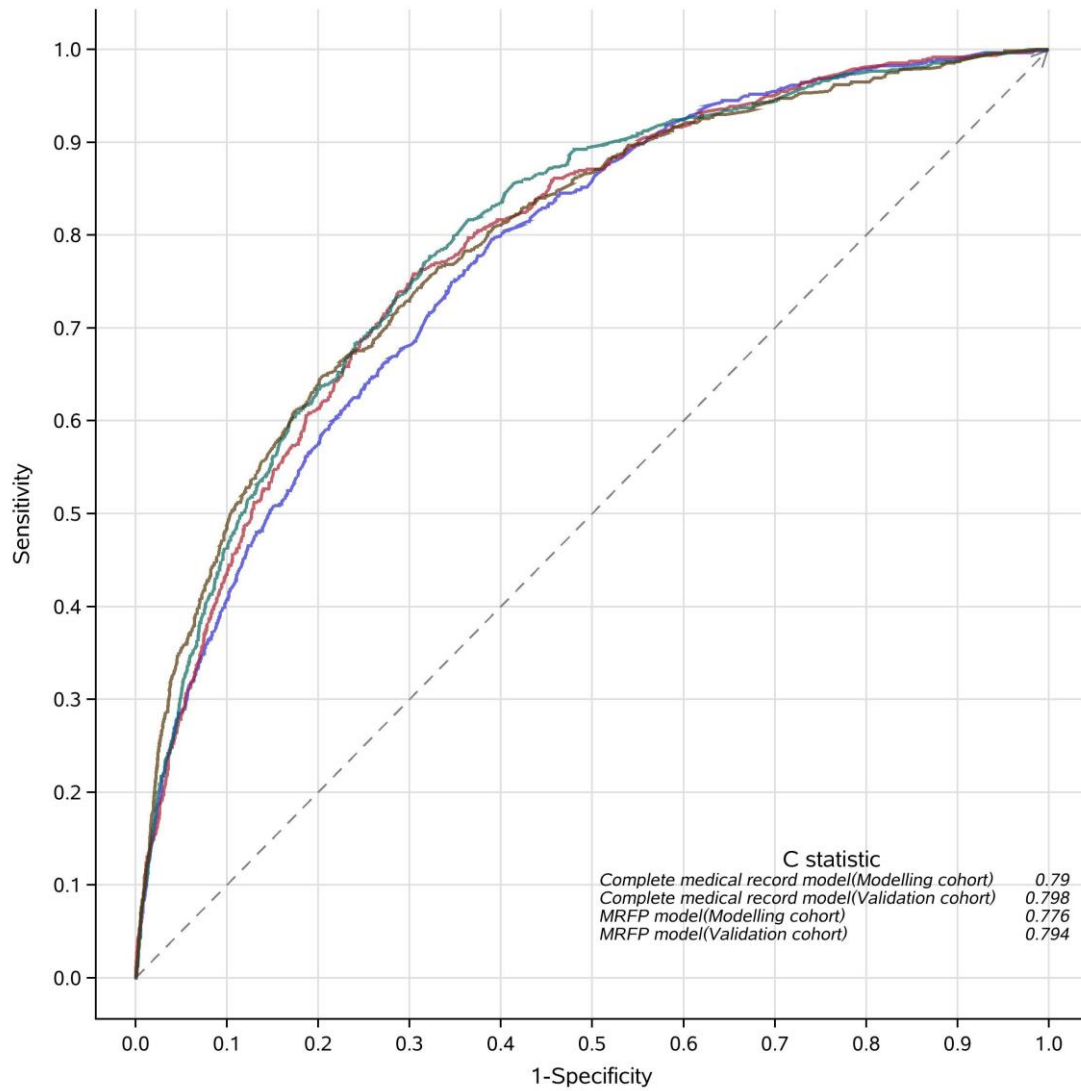

1  
2  
3  
4 **Figure S3. Distribution of risk standardized mortality rate of study hospitals estimated**  
5  
6 **by MRFP model. (a) Modelling cohort (b) Validation cohort**  
7

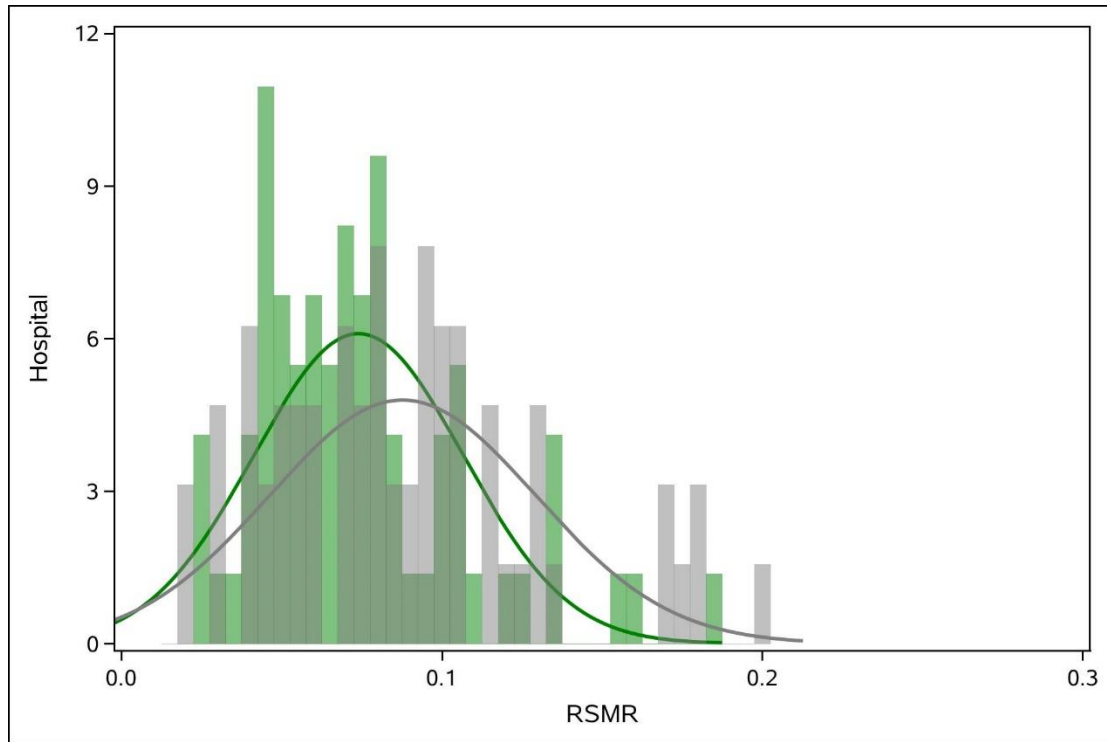

(a)

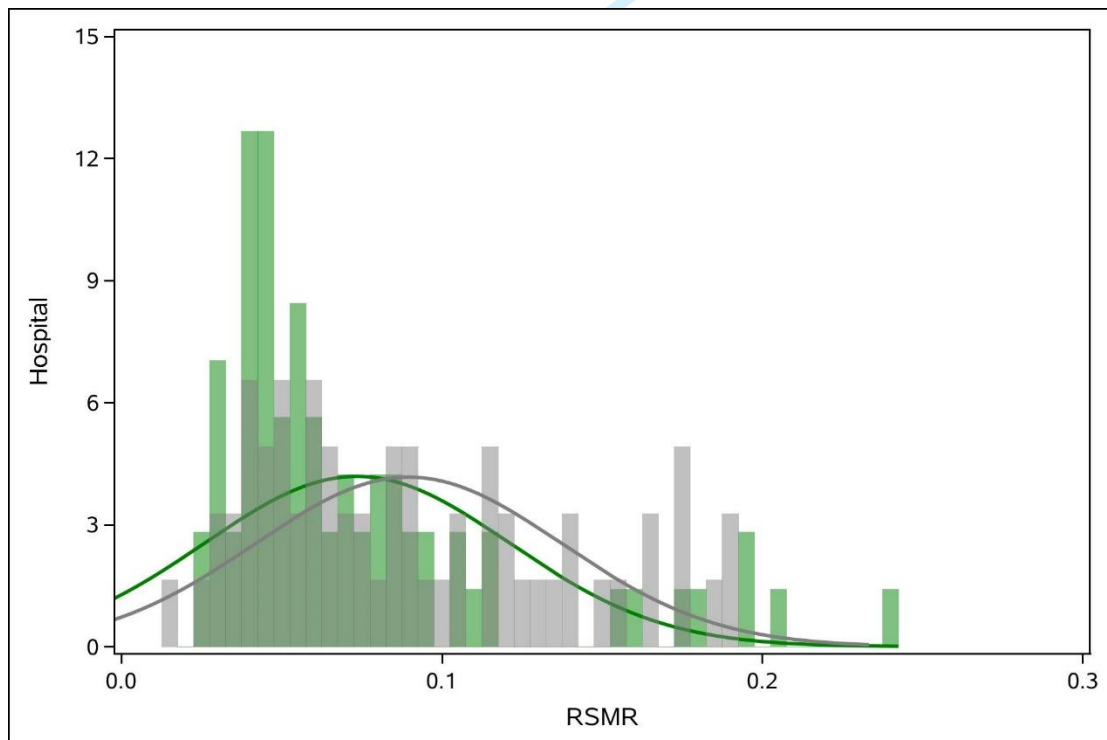

(b)
