# Supplementary material for: Are medical record front page data suitable for risk adjustment in hospital performance measurement? Development and validation of a risk model of in-hospital mortality after acute myocardial infarction
Source: PubMed Central journal article supplement — BMJ Open. 2021 Apr 9;11(4):e045053. doi: 10.1136/bmjopen-2020-045053 (PMC8043007; doi:10.1136/bmjopen-2020-045053), 2021-04-09
Supplement: bmjopen-2020-045053supp001.pdf [file bmjopen-2020-045053supp001.pdf]

## **Supplementary materials**

**Table S1. Data elements required in the HQMS system**

| No. | Data element                               | Field name | Data type  | Length | Required | Remarks             |
|-----|--------------------------------------------|------------|------------|--------|----------|---------------------|
| 1   | Hospital ID                                | P900       | Character  | 22     | Yes      |                     |
| 2   | Hospital name                              | P6891      | Character  | 80     | Yes      |                     |
| 3   | Medical Insurance Number                   | P686       | Character  | 50     |          |                     |
| 4   | Health-card number                         | P800       | Character  | 50     |          |                     |
| 5   | Method of healthcare payment               | P1         | Character  | 1      | Yes      |                     |
| 6   | Admission times                            | P2         | Number     | 3      | Yes      |                     |
| 7   | Medical record number                      | P3         | Character  | 20     | Yes      |                     |
| 8   | Name                                       | P4         | Character  | 40     |          |                     |
| 9   | Gender                                     | P5         | Character  | 1      | Yes      |                     |
| 10  | Birth date                                 | P6         | Date       |        |          | yyyy-mm-dd          |
| 11  | Age                                        | P7         | Number     | 3      |          | Unit (year)         |
| 12  | Marital status                             | P8         | Character  | 1      | Yes      |                     |
| 13  | Occupation                                 | P9         | Character  | 2      |          |                     |
| 14  | Birthplace (province)                      | P101       | Character  | 30     |          |                     |
| 15  | Birthplace (city)                          | P102       | Character  | 30     |          |                     |
| 16  | Birthplace (county)                        | P103       | Character  | 30     |          |                     |
| 17  | Ethnicity                                  | P11        | Character  | 20     |          |                     |
| 18  | Nationality                                | P12        | Character  | 40     |          |                     |
| 19  | Social ID                                  | P13        | Character  | 18     |          |                     |
| 20  | Residence                                  | P801       | Character  | 200    |          |                     |
| 21  | Residential phone number                   | P802       | Character  | 40     |          |                     |
| 22  | Postcode of residence                      | P803       | Character  | 6      |          |                     |
| 23  | Name and address of employer               | P14        | Character  | 200    |          |                     |
| 24  | Phone number                               | P15        | Character  | 40     |          |                     |
| 25  | Postcode of employer address               | P16        | Character  | 6      |          |                     |
| 26  | “Hukou” address                            | P17        | Character  | 200    |          |                     |
| 27  | Postcode of "Hukou" address                | P171       | Character  | 6      |          |                     |
| 28  | Name of the contact                        | P18        | Character  | 20     |          |                     |
| 29  | Relationship with the patient              | P19        | Character  | 40     |          |                     |
| 30  | Address of the contact                     | P20        | Character  | 200    |          |                     |
| 31  | Admission path                             | P804       | Character  | 1      |          |                     |
| 32  | Phone number of the contact                | P21        | Character  | 30     |          |                     |
| 33  | Admission date                             | P22        | Date, time |        | Yes      | yyyy-mm-dd HH:mm:ss |
| 34  | Department of admission                    | P23        | Character  | 6      | Yes      |                     |
| 35  | Ward of admission                          | P231       | Character  | 30     |          |                     |
| 36  | Department of patient being transferred to | P24        | Character  | 6      |          |                     |
| 37  | Discharge date                             | P25        | Date, time |        | Yes      | yyyy-mm-dd HH:mm:ss |
| 38  | Department of discharge                    | P26        | Character  | 6      | Yes      |                     |

|    |                                                    |       |           |     |     |                                                                    |
|----|----------------------------------------------------|-------|-----------|-----|-----|--------------------------------------------------------------------|
| 39 | Ward of discharge                                  | P261  | Character | 30  |     |                                                                    |
| 40 | Length of hospitalization                          | P27   | Number    | 6   | Yes |                                                                    |
| 41 | Diagnosis code of out-patient/emergency department | P28   | Character | 20  |     | Diagnosis code: ICD10                                              |
| 42 | Diagnosis of out-patient/emergency department      | P281  | Character | 100 | Yes |                                                                    |
| 43 | Admission status                                   | P29   | Character | 1   |     |                                                                    |
| 44 | Admission diagnosis code                           | P30   | Character | 30  |     | Diagnosis code: ICD10                                              |
| 45 | Admission diagnosis                                | P301  | Character | 100 |     |                                                                    |
| 46 | Date of diagnosis being confirmed                  | P31   | Date      |     |     | yyyy-mm-dd                                                         |
| 47 | Code of main diagnosis                             | P321  | Character | 20  | Yes | Diagnosis code: ICD10. If there's no appropriate one, fill in "NA" |
| 48 | Primary diagnosis                                  | P322  | Character | 100 | Yes |                                                                    |
| 49 | Primary diagnosis: admission status                | P805  | Character | 1   |     |                                                                    |
| 50 | Primary diagnosis: discharge status                | P323  | Character | 1   |     |                                                                    |
| 51 | Code of other diagnosis 1                          | P324  | Character | 20  |     | Diagnosis code: ICD10                                              |
| 52 | Other diagnosis 1                                  | P325  | Character | 100 |     |                                                                    |
| 53 | Other diagnosis 1: admission status                | P806  | Character | 1   |     |                                                                    |
| 54 | Other diagnosis 1: discharge status                | P326  | Character | 1   |     |                                                                    |
| 55 | Code of Other diagnosis 2                          | P327  | Character | 20  |     | Diagnosis code: ICD10                                              |
| 56 | Other diagnosis 2                                  | P328  | Character | 100 |     |                                                                    |
| 57 | Other diagnosis 2: admission status                | P807  | Character | 1   |     |                                                                    |
| 58 | Other diagnosis 2: discharge status                | P329  | Character | 1   |     |                                                                    |
| 59 | Code of Other diagnosis 3                          | P3291 | Character | 20  |     | Diagnosis code: ICD10                                              |
| 60 | Other diagnosis 3                                  | P3292 | Character | 100 |     |                                                                    |
| 61 | Other diagnosis 3: admission status                | P808  | Character | 1   |     |                                                                    |
| 62 | Other diagnosis 3: discharge status                | P3293 | Character | 1   |     |                                                                    |
| 63 | Code of Other diagnosis 4                          | P3294 | Character | 20  |     | Diagnosis code: ICD10                                              |
| 64 | Other diagnosis 4                                  | P3295 | Character | 100 |     |                                                                    |
| 65 | Other diagnosis 4: admission status                | P809  | Character | 1   |     |                                                                    |
| 66 | Other diagnosis 4: discharge status                | P3296 | Character | 1   |     |                                                                    |

|    |                                      |       |           |     |  |                       |
|----|--------------------------------------|-------|-----------|-----|--|-----------------------|
| 67 | Code of Other diagnosis 5            | P3297 | Character | 20  |  | Diagnosis code: ICD10 |
| 68 | Other diagnosis 5                    | P3298 | Character | 100 |  |                       |
| 69 | Other diagnosis 5: admission status  | P810  | Character | 1   |  |                       |
| 70 | Other diagnosis 5: discharge status  | P3299 | Character | 1   |  |                       |
| 71 | Code of Other diagnosis 6            | P3281 | Character | 20  |  | Diagnosis code: ICD10 |
| 72 | Other diagnosis 6                    | P3282 | Character | 100 |  |                       |
| 73 | Other diagnosis 6: admission status  | P811  | Character | 1   |  |                       |
| 74 | Other diagnosis 6: discharge status  | P3283 | Character | 1   |  |                       |
| 75 | Code of Other diagnosis 7            | P3284 | Character | 20  |  | Diagnosis code: ICD10 |
| 76 | Other diagnosis 7                    | P3285 | Character | 100 |  |                       |
| 77 | Other diagnosis 7: admission status  | P812  | Character | 1   |  |                       |
| 78 | Other diagnosis 7: discharge status  | P3286 | Character | 1   |  |                       |
| 79 | Code of Other diagnosis 8            | P3287 | Character | 20  |  | Diagnosis code: ICD10 |
| 80 | Other diagnosis 8                    | P3288 | Character | 100 |  |                       |
| 81 | Other diagnosis 8: admission status  | P813  | Character | 1   |  |                       |
| 82 | Other diagnosis 8: discharge status  | P3289 | Character | 1   |  |                       |
| 83 | Code of Other diagnosis 9            | P3271 | Character | 20  |  | Diagnosis code: ICD10 |
| 84 | Other diagnosis 9                    | P3272 | Character | 100 |  |                       |
| 85 | Other diagnosis 9: admission status  | P814  | Character | 1   |  |                       |
| 86 | Other diagnosis 9: discharge status  | P3273 | Character | 1   |  |                       |
| 87 | Code of Other diagnosis 10           | P3274 | Character | 20  |  | Diagnosis code: ICD10 |
| 88 | Other diagnosis 10                   | P3275 | Character | 100 |  |                       |
| 89 | Other diagnosis 10: admission status | P815  | Character | 1   |  |                       |
| 90 | Other diagnosis 10: discharge status | P3276 | Character | 1   |  |                       |
| 91 | Frequency of in-hospital infection   | P689  | Number    | 5   |  |                       |
| 92 | Code of pathological diagnosis 1     | P351  | Character | 20  |  | Diagnosis code: ICD10 |
| 93 | Pathological diagnosis 1             | P352  | Character | 100 |  |                       |
| 94 | Pathological number 1                | P816  | Character | 50  |  |                       |

|     |                                                         |      |            |              |  |                       |
|-----|---------------------------------------------------------|------|------------|--------------|--|-----------------------|
| 95  | Code of pathological diagnosis 2                        | P353 | Character  | 20           |  | Diagnosis code: ICD10 |
| 96  | Pathological diagnosis 2                                | P354 | Character  | 100          |  |                       |
| 97  | Pathological number 2                                   | P817 | Character  | 50           |  |                       |
| 98  | Code of pathological diagnosis 3                        | P355 | Character  | 20           |  | Diagnosis code: ICD10 |
| 99  | Pathological diagnosis 3                                | P356 | Character  | 100          |  |                       |
| 100 | Pathological number 3                                   | P818 | Character  | 50           |  |                       |
| 101 | External factors' code of trauma and poisoning 1        | P361 | Character  | 20           |  | Diagnosis code: ICD10 |
| 102 | External factors of trauma and poisoning 1              | P362 | Character  | 100          |  |                       |
| 103 | External factors' code of trauma and poisoning 2        | P363 | Character  | 20           |  | Diagnosis code: ICD10 |
| 104 | External factors of trauma and poisoning 2              | P364 | Character  | 100          |  |                       |
| 105 | External factors' code of trauma and poisoning 3        | P365 | Character  | 20           |  | Diagnosis code: ICD10 |
| 106 | External factors of trauma and poisoning 3              | P366 | Character  | 100          |  |                       |
| 107 | Allergen                                                | P371 | Collection | Multi-choice |  |                       |
| 108 | Allergic drug                                           | P372 | Character  | 100          |  |                       |
| 109 | HBsAg                                                   | P38  | Character  | 1            |  |                       |
| 110 | HCV-Ab                                                  | P39  | Character  | 1            |  |                       |
| 111 | HIV-Ab                                                  | P40  | Character  | 1            |  |                       |
| 112 | Coincidence between out-patient and discharge diagnosis | P411 | Character  | 1            |  |                       |
| 113 | Coincidence between admitting and discharge diagnosis   | P412 | Character  | 1            |  |                       |
| 114 | Coincidence between pre- and post-operation diagnosis   | P413 | Character  | 1            |  |                       |
| 115 | Coincidence between clinical and pathological diagnosis | P414 | Character  | 1            |  |                       |
| 116 | Coincidence between radial and pathological diagnosis   | P415 | Character  | 3            |  |                       |
| 117 | Rescue times                                            | P421 | Number     | 3            |  |                       |
| 118 | Succeeding rescue times                                 | P422 | Number     | 1            |  |                       |
| 119 | Strongest evidence of diagnosis                         | P687 | Character  | 1            |  |                       |
| 120 | Differentiation degree                                  | P688 | Character  | 40           |  |                       |
| 121 | Chief                                                   | P431 | Character  | 40           |  |                       |
| 122 | (Associate) chief physician                             | P432 | Character  | 40           |  |                       |
| 123 | Attending physician                                     | P433 | Character  | 40           |  |                       |

|     |                                  |       |            |     |                                         |                       |
|-----|----------------------------------|-------|------------|-----|-----------------------------------------|-----------------------|
| 124 | Resident                         | P434  | Character  | 40  |                                         |                       |
| 125 | Primary nurse                    | P819  | Character  | 40  |                                         |                       |
| 126 | Refresher physician              | P435  | Character  | 40  |                                         |                       |
| 127 | Postgraduate intern              | P436  | Character  | 40  |                                         |                       |
| 128 | Intern                           | P437  | Character  | 40  |                                         |                       |
| 129 | Coder                            | P438  | Character  | 40  |                                         |                       |
| 130 | Medical record quality           | P44   | Character  | 1   |                                         |                       |
| 131 | Quality-control physician        | P45   | Character  | 40  |                                         |                       |
| 132 | Quality-control primary nurse    | P46   | Character  | 40  |                                         |                       |
| 133 | Quality-control date             | P47   | Date       |     |                                         | yyyy-mm-dd            |
| 134 | Operation / Procedure code 1     | P490  | Character  | 20  |                                         | Diagnosis code: ICD10 |
| 135 | Operation / Procedure date 1     | P491  | Date, time |     | Obligated if operation code isn't empty | yyyy-mm-dd HH:mm:ss   |
| 136 | Operation / Procedure level 1    | P820  | Character  | 1   |                                         |                       |
| 137 | Operation / Procedure name 1     | P492  | Character  | 100 | Obligated if operation code isn't empty |                       |
| 138 | Operation / Procedure part 1     | P493  | Character  | 4   |                                         |                       |
| 139 | Operation / Procedure duration 1 | P494  | Number     | 5   |                                         | Unit (hour)           |
| 140 | Surgeon 1                        | P495  | Character  | 40  |                                         |                       |
| 141 | First assistant 1                | P496  | Character  | 40  |                                         |                       |
| 142 | Second assistant 1               | P497  | Character  | 40  |                                         |                       |
| 143 | Anaesthesia 1                    | P498  | Character  | 6   |                                         |                       |
| 144 | Anaesthesia class 1              | P4981 | Character  | 1   |                                         |                       |
| 145 | Wound healing ratings 1          | P499  | Character  | 2   |                                         |                       |
| 146 | Anaesthesiologist 1              | P4910 | Character  | 40  |                                         |                       |
| 147 | Operation / Procedure code 2     | P4911 | Character  | 20  |                                         | Diagnosis code: ICD10 |
| 148 | Operation / Procedure date 2     | P4912 | Date, time |     |                                         | yyyy-mm-dd HH:mm:ss   |
| 149 | Operation / Procedure level 2    | P821  | Character  | 1   |                                         |                       |
| 150 | Operation / Procedure name 2     | P4913 | Character  | 100 |                                         |                       |
| 151 | Operation / Procedure part 2     | P4914 | Character  | 4   |                                         |                       |
| 152 | Operation / Procedure duration 2 | P4915 | Number     | 5   |                                         | Unit (hour)           |
| 153 | Surgeon 2                        | P4916 | Character  | 40  |                                         |                       |
| 154 | First assistant 2                | P4917 | Character  | 40  |                                         |                       |
| 155 | Second assistant 2               | P4918 | Character  | 40  |                                         |                       |
| 156 | Anaesthesia 2                    | P4919 | Character  | 6   |                                         |                       |
| 157 | Anaesthesia class 2              | P4982 | Character  | 1   |                                         |                       |
| 158 | Wound healing ratings 2          | P4920 | Character  | 2   |                                         |                       |

|     |                                  |       |            |     |  |                       |
|-----|----------------------------------|-------|------------|-----|--|-----------------------|
| 159 | Anaesthesiologist 2              | P4921 | Character  | 40  |  |                       |
| 160 | Operation / Procedure code 3     | P4922 | Character  | 20  |  | Diagnosis code: ICD10 |
| 161 | Operation / Procedure date 3     | P4923 | Date, time |     |  | yyyy-mm-dd HH:mm:ss   |
| 162 | Operation / Procedure level 3    | P822  | Character  | 1   |  |                       |
| 163 | Operation / Procedure name 3     | P4924 | Character  | 100 |  |                       |
| 164 | Operation / Procedure part 3     | P4925 | Character  | 4   |  |                       |
| 165 | Operation / Procedure duration 3 | P4526 | Number     | 5   |  | Unit (hour)           |
| 166 | Surgeon 3                        | P4527 | Character  | 40  |  |                       |
| 167 | First assistant 3                | P4528 | Character  | 40  |  |                       |
| 168 | Second assistant 3               | P4529 | Character  | 40  |  |                       |
| 169 | Anaesthesia 3                    | P4530 | Character  | 6   |  |                       |
| 170 | Anaesthesia class 3              | P4983 | Character  | 1   |  |                       |
| 171 | Wound healing ratings 3          | P4531 | Character  | 2   |  |                       |
| 172 | Anaesthesiologist 3              | P4532 | Character  | 40  |  |                       |
| 173 | Operation / Procedure code 4     | P4533 | Character  | 20  |  | Diagnosis code: ICD10 |
| 174 | Operation / Procedure date 4     | P4534 | Date, time |     |  | yyyy-mm-dd HH:mm:ss   |
| 175 | Operation / Procedure level 4    | P823  | Character  | 1   |  |                       |
| 176 | Operation / Procedure name 4     | P4535 | Character  | 100 |  |                       |
| 177 | Operation / Procedure part 4     | P4536 | Character  | 4   |  |                       |
| 178 | Operation / Procedure duration 4 | P4537 | Number     | 5   |  | Unit (hour)           |
| 179 | Surgeon 4                        | P4538 | Character  | 40  |  |                       |
| 180 | First assistant 4                | P4539 | Character  | 40  |  |                       |
| 181 | Second assistant 4               | P4540 | Character  | 40  |  |                       |
| 182 | Anaesthesia 4                    | P4541 | Character  | 6   |  |                       |
| 183 | Anaesthesia class 4              | P4542 | Character  | 1   |  |                       |
| 184 | Wound healing ratings 4          | P4543 | Character  | 2   |  |                       |
| 185 | Anaesthesiologist 4              | P4544 | Character  | 40  |  |                       |
| 186 | Operation / Procedure code 5     | P4545 | Date, time | 20  |  | Diagnosis code: ICD10 |
| 187 | Operation / Procedure date 5     | P4546 | Character  |     |  | yyyy-mm-dd HH:mm:ss   |
| 188 | Operation / Procedure level 5    | P824  | Character  | 1   |  |                       |
| 189 | Operation / Procedure name 5     | P4546 | Character  | 100 |  |                       |
| 190 | Operation / Procedure part 5     | P4547 | Character  | 4   |  |                       |
| 191 | Operation / Procedure duration 5 | P4548 | Number     | 5   |  | Unit (hour)           |
| 192 | Surgeon 5                        | P4549 | Character  | 40  |  |                       |
| 193 | First assistant 5                | P4550 | Character  | 40  |  |                       |
| 194 | Second assistant 5               | P4551 | Character  | 40  |  |                       |
| 195 | Anaesthesia 5                    | P4552 | Character  | 6   |  |                       |
| 196 | Anaesthesia class 5              | P4985 | Character  | 1   |  |                       |
| 197 | Wound healing ratings 5          | P4553 | Character  | 2   |  |                       |
| 198 | Anaesthesiologist 5              | P4554 | Character  | 40  |  |                       |

|     |                                  |        |            |     |  |                       |
|-----|----------------------------------|--------|------------|-----|--|-----------------------|
| 199 | Operation / Procedure code 6     | P45002 | Character  | 20  |  | Diagnosis code: ICD10 |
| 200 | Operation / Procedure date 6     | P45003 | Date, time |     |  | yyyy-mm-dd HH:mm:ss   |
| 201 | Operation / Procedure level 6    | P825   | Character  | 1   |  |                       |
| 202 | Operation / Procedure name 6     | P45004 | Character  | 100 |  |                       |
| 203 | Operation / Procedure part 6     | P45005 | Character  | 4   |  |                       |
| 204 | Operation / Procedure duration 6 | P45006 | Number     | 5   |  | Unit (hour)           |
| 205 | Surgeon 6                        | P45007 | Character  | 40  |  |                       |
| 206 | First assistant 6                | P45008 | Character  | 40  |  |                       |
| 207 | Second assistant 6               | P45009 | Character  | 40  |  |                       |
| 208 | Anaesthesia 6                    | P45010 | Character  | 6   |  |                       |
| 209 | Anaesthesia class 6              | P45011 | Character  | 1   |  |                       |
| 210 | Wound healing ratings 6          | P45012 | Character  | 2   |  |                       |
| 211 | Anaesthesiologist 6              | P45013 | Character  | 40  |  |                       |
| 212 | Operation / Procedure code 7     | P45014 | Character  | 20  |  | Diagnosis code: ICD10 |
| 213 | Operation / Procedure date 7     | P45015 | Date, time |     |  | yyyy-mm-dd HH:mm:ss   |
| 214 | Operation / Procedure level 7    | P826   | Character  | 1   |  |                       |
| 215 | Operation / Procedure name 7     | P45016 | Character  | 100 |  |                       |
| 216 | Operation / Procedure part 7     | P45017 | Number     | 4   |  |                       |
| 217 | Operation / Procedure duration 7 | P45018 | Character  | 5   |  | Unit (hour)           |
| 218 | Surgeon 7                        | P45019 | Character  | 40  |  |                       |
| 219 | First assistant 7                | P45020 | Character  | 40  |  |                       |
| 220 | Second assistant 7               | P45021 | Character  | 40  |  |                       |
| 221 | Anaesthesia 7                    | P45022 | Character  | 6   |  |                       |
| 222 | Anaesthesia class 7              | P45023 | Character  | 1   |  |                       |
| 223 | Wound healing ratings 7          | P45024 | Character  | 2   |  |                       |
| 224 | Anaesthesiologist 7              | P45025 | Character  | 40  |  |                       |
| 225 | Operation / Procedure code 8     | P45026 | Character  | 20  |  | Diagnosis code: ICD10 |
| 226 | Operation / Procedure date 8     | P45027 | Date, time |     |  | yyyy-mm-dd HH:mm:ss   |
| 227 | Operation / Procedure level 8    | P827   | Character  | 1   |  |                       |
| 228 | Operation / Procedure name 8     | P45028 | Character  | 100 |  |                       |
| 229 | Operation / Procedure part 8     | P45029 | Character  | 4   |  |                       |
| 230 | Operation / Procedure duration 8 | P45030 | Number     | 5   |  | Unit (hour)           |
| 231 | Surgeon 8                        | P45031 | Character  | 40  |  |                       |
| 232 | First assistant 8                | P45032 | Character  | 40  |  |                       |
| 233 | Second assistant 8               | P45033 | Character  | 40  |  |                       |
| 234 | Anaesthesia 8                    | P45034 | Character  | 6   |  |                       |
| 235 | Anaesthesia class 8              | P45035 | Character  | 1   |  |                       |
| 236 | Wound healing ratings 8          | P45036 | Character  | 2   |  |                       |
| 237 | Anaesthesiologist 8              | P45037 | Character  | 40  |  |                       |
| 238 | Operation / Procedure code 9     | P45038 | Character  | 20  |  | Diagnosis code: ICD10 |



|     |                                   |        |            |     |  |                       |
|-----|-----------------------------------|--------|------------|-----|--|-----------------------|
| 239 | Operation / Procedure date 9      | P45039 | Date, time |     |  | yyyy-mm-dd HH:mm:ss   |
| 240 | Operation / Procedure level 9     | P828   | Character  | 1   |  |                       |
| 241 | Operation / Procedure name 9      | P45040 | Character  | 100 |  |                       |
| 242 | Operation / Procedure part 9      | P45041 | Character  | 4   |  |                       |
| 243 | Operation / Procedure duration 9  | P45042 | Number     | 5   |  | Unit (hour)           |
| 244 | Surgeon 9                         | P45043 | Character  | 40  |  |                       |
| 245 | First assistant 9                 | P45044 | Character  | 40  |  |                       |
| 246 | Second assistant 9                | P45045 | Character  | 40  |  |                       |
| 247 | Anaesthesia 9                     | P45046 | Character  | 6   |  |                       |
| 248 | Anaesthesia class 9               | P45047 | Character  | 1   |  |                       |
| 249 | Wound healing ratings 9           | P45048 | Character  | 2   |  |                       |
| 250 | Anaesthesiologist 9               | P45049 | Character  | 40  |  |                       |
| 251 | Operation / Procedure code 10     | P45050 | Character  | 20  |  | Diagnosis code: ICD10 |
| 252 | Operation / Procedure date 10     | P45051 | Date, time |     |  | yyyy-mm-dd HH:mm:ss   |
| 253 | Operation / Procedure level 10    | P829   | Character  | 1   |  |                       |
| 254 | Operation / Procedure name 10     | P45052 | Character  | 100 |  |                       |
| 255 | Operation / Procedure part 10     | P45053 | Character  | 4   |  |                       |
| 256 | Operation / Procedure duration 10 | P45054 | Number     | 5   |  | Unit (hour)           |
| 257 | Surgeon 10                        | P45055 | Character  | 40  |  |                       |
| 258 | First assistant 10                | P45056 | Character  | 40  |  |                       |
| 259 | Second assistant 10               | P45057 | Character  | 40  |  |                       |
| 260 | Anaesthesia 10                    | P45058 | Character  | 6   |  |                       |
| 261 | Anaesthesia class 10              | P45059 | Character  | 1   |  |                       |
| 262 | Wound healing ratings 10          | P45060 | Character  | 2   |  |                       |
| 263 | Anaesthesiologist 10              | P45061 | Character  | 40  |  |                       |
| 264 | Length of critical care           | P561   | Number     | 6   |  | Unit (day)            |
| 265 | Length of Grade 1 nursing         | P562   | Number     | 6   |  | Unit (day)            |
| 266 | Length of Grade 2 nursing         | P563   | Number     | 6   |  | Unit (day)            |
| 267 | Length of Grade 3 nursing         | P564   | Number     | 6   |  | Unit (day)            |
| 268 | Intensive care unit 1             | P6911  | Character  | 4   |  |                       |
| 269 | Entrance date and time 1          | P6912  | Date       |     |  | yyyy-mm-dd            |
| 270 | Exit date and time 1              | P6913  | Date       |     |  | yyyy-mm-dd            |
| 271 | Intensive care unit 2             | P6914  | Character  | 4   |  |                       |
| 272 | Entrance date and time 2          | P6915  | Date       |     |  | yyyy-mm-dd            |
| 273 | Exit date and time 2              | P6916  | Date       |     |  | yyyy-mm-dd            |
| 274 | Intensive care unit 3             | P6917  | Character  | 4   |  |                       |
| 275 | Entrance date and time 3          | P6918  | Date       |     |  | yyyy-mm-dd            |
| 276 | Exit date and time 3              | P6919  | Date       |     |  | yyyy-mm-dd            |
| 277 | Intensive care unit 4             | P6920  | Character  | 4   |  |                       |
| 278 | Entrance date and time 4          | P6921  | Date       |     |  | yyyy-mm-dd            |
| 279 | Exit date and time 4              | P6922  | Date       |     |  | yyyy-mm-dd            |

|     |                                                                  |       |            |              |     |                                  |
|-----|------------------------------------------------------------------|-------|------------|--------------|-----|----------------------------------|
| 280 | Intensive care unit 5                                            | P6923 | Character  | 4            |     |                                  |
| 281 | Entrance date and time 5                                         | P6924 | Date       |              |     | yyyy-mm-dd                       |
| 282 | Exit date and time 5                                             | P6925 | Date       |              |     | yyyy-mm-dd                       |
| 283 | Autopsy                                                          | P57   | Character  | 1            |     |                                  |
| 284 | First case of operation, treatment, examination and diagnosis    | P58   | Character  | 1            |     |                                  |
| 285 | Type of the patients with operation                              | P581  | Collection | Multi-choice |     |                                  |
| 286 | Follow-up                                                        | P60   | Character  | 1            |     |                                  |
| 287 | Follow-up time (week)                                            | P611  | Number     | 2            |     |                                  |
| 288 | Follow-up time (month)                                           | P612  | Number     | 2            |     |                                  |
| 289 | Follow-up time (year)                                            | P613  | Number     | 2            |     |                                  |
| 290 | Teach Case                                                       | P59   | Character  | 1            |     |                                  |
| 291 | Blood type (ABO)                                                 | P62   | Character  | 1            | Yes |                                  |
| 292 | Blood type (Rh)                                                  | P63   | Character  | 1            | Yes |                                  |
| 293 | Transfusion reaction                                             | P64   | Character  | 1            |     |                                  |
| 294 | Erythrocyte                                                      | P651  | Number     | 6            |     | Unit (U)                         |
| 295 | Platelet                                                         | P652  | Number     | 6            |     | Unit (bag)                       |
| 296 | Plasma                                                           | P653  | Number     | 6            |     | Unit (ml)                        |
| 297 | Whole blood                                                      | P654  | Number     | 6            |     | Unit (ml)                        |
| 298 | Autologous recovery                                              | P655  | Number     | 6            |     | Unit (ml)                        |
| 299 | Others                                                           | P656  | Number     | 6            |     | Unit (ml)                        |
| 300 | Age (less than 1 years old)                                      | P66   | Number     | 4,2          |     | Unit (month), two decimal places |
| 301 | New-born weight 1                                                | P681  | Number     | 6            |     | Unit (gram)                      |
| 302 | New-born weight 2                                                | P682  | Number     | 6            |     | Unit (gram)                      |
| 303 | New-born weight 3                                                | P683  | Number     | 6            |     | Unit (gram)                      |
| 304 | New-born weight 4                                                | P684  | Number     | 6            |     | Unit (gram)                      |
| 305 | New-born weight 5                                                | P685  | Number     | 6            |     | Unit (gram)                      |
| 306 | New-born weight at admission                                     | P67   | Number     | 6            |     | Unit (gram)                      |
| 307 | Pre-admitting (coma duration of cranial injury patients, hour)   | P731  | Number     | 6            |     | Unit (hour)                      |
| 308 | Pre-admitting (coma duration of cranial injury patients, minute) | P732  | Number     | 2            |     | Unit (min)                       |
| 309 | Post-admitting (coma duration of cranial injury patients, hour)  | P733  | Number     | 6            |     | Unit (hour)                      |
| 310 | Post-admitting coma duration of cranial injury patients, minute) | P734  | Number     | 2            |     | Unit (min)                       |
| 311 | Duration of ventilator application                               | P72   | Number     | 6            |     | Unit (hour)                      |

|     |                                                                                     |      |           |      |     |                    |
|-----|-------------------------------------------------------------------------------------|------|-----------|------|-----|--------------------|
| 312 | Readmission Plan within 31 days after discharge                                     | P830 | Character | 1    |     |                    |
| 313 | Readmission aims                                                                    | P831 | Character | 100  |     |                    |
| 314 | Method of discharge                                                                 | P741 | Character | 1    |     |                    |
| 315 | Hospital from which the patient is transferred                                      | P742 | Character | 100  |     |                    |
| 316 | Community service association/county hospital from which the patient is transferred | P743 | Character | 100  |     |                    |
| 317 | Gross charge                                                                        | P782 | Number    | 10,2 | Yes | Two decimal places |
| 318 | Out-of-pocket money                                                                 | P751 | Number    | 10,2 |     | Two decimal places |
| 319 | Cost for general medical care                                                       | P752 | Number    | 10,2 |     | Two decimal places |
| 320 | Cost for treatment                                                                  | P754 | Number    | 10,2 |     | Two decimal places |
| 321 | Cost for nursing care                                                               | P755 | Number    | 10,2 |     | Two decimal places |
| 322 | Cost for other integrated medical services                                          | P756 | Number    | 10,2 |     | Two decimal places |
| 323 | Cost for pathological diagnosis                                                     | P757 | Number    | 10,2 |     | Two decimal places |
| 324 | Cost for lab text                                                                   | P758 | Number    | 10,2 |     | Two decimal places |
| 325 | Cost for imaging test                                                               | P759 | Number    | 10,2 |     | Two decimal places |
| 326 | Cost for clinical diagnosis items                                                   | P760 | Number    | 10,2 |     | Two decimal places |
| 327 | Cost for nonoperation therapy                                                       | P761 | Number    | 10,2 |     | Two decimal places |
| 328 | Cost for clinical physical treatment                                                | P762 | Number    | 10,2 |     | Two decimal places |
| 329 | Operation-treatment cost                                                            | P763 | Number    | 10,2 |     | Two decimal places |
| 330 | Anaesthesia cost                                                                    | P764 | Number    | 10,2 |     | Two decimal places |
| 331 | Operation cost                                                                      | P765 | Number    | 10,2 |     | Two decimal places |
| 332 | Rehabilitation cost                                                                 | P767 | Number    | 10,2 |     | Two decimal places |
| 333 | Cost for traditional Chinese medicine                                               | P768 | Number    | 10,2 |     | Two decimal places |
| 334 | Cost for western medicine                                                           | P769 | Number    | 10,2 |     | Two decimal places |
| 335 | Cost for Antibiotics                                                                | P770 | Number    | 10,2 |     | Two decimal places |
| 336 | Cost for traditional Chinese medicine                                               | P771 | Number    | 10,2 |     | Two decimal places |
| 337 | Cost for Herbs                                                                      | P772 | Number    | 10,2 |     | Two decimal places |
| 338 | Cost for whole blood transfusion                                                    | P773 | Number    | 10,2 |     | Two decimal places |
| 339 | Cost for blood transfusion                                                          | P774 | Number    | 10,2 |     | Two decimal places |
| 340 | Cost for globin transfusion                                                         | P775 | Number    | 10,2 |     | Two decimal places |
| 341 | Cost for clotting factor transfusion                                                | P776 | Number    | 10,2 |     | Two decimal places |
| 342 | Cost for cytokine transfusion                                                       | P777 | Number    | 10,2 |     | Two decimal places |

|     |                                                     |      |        |      |  |                    |
|-----|-----------------------------------------------------|------|--------|------|--|--------------------|
| 343 | Cost for disposable medical material in examination | P778 | Number | 10,2 |  | Two decimal places |
| 344 | Cost for disposable medical material in treatment   | P779 | Number | 10,2 |  | Two decimal places |
| 345 | Cost for disposable medical material in operation   | P780 | Number | 10,2 |  | Two decimal places |
| 346 | Other cost                                          | P781 | Number | 10,2 |  | Two decimal places |

**Figure S1. Flowchart of patients' exclusion**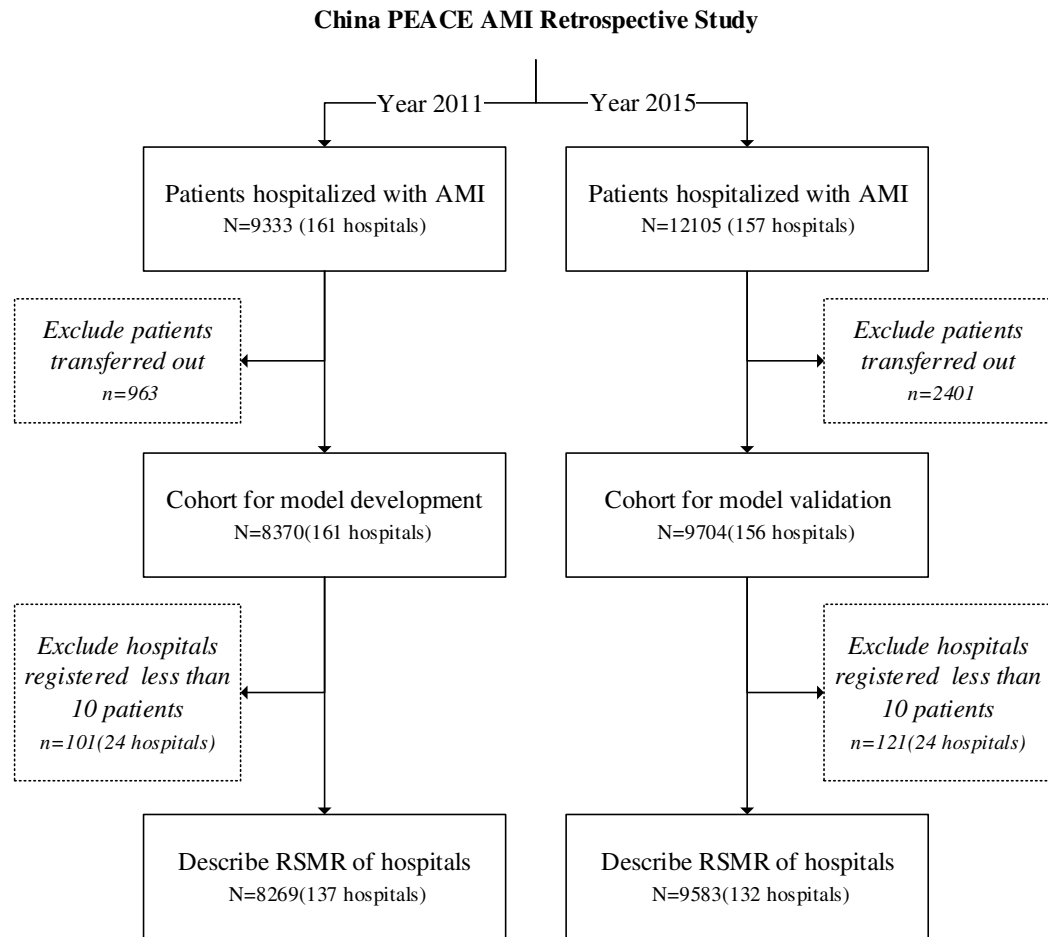

RSMR: risk standardized mortality rate

## Appendix A. Comparison of established risk-perdition model with the GRACE ACS in-hospital mortality model

We calculated the predicted probability of in-hospital death among our development and validation cohorts by 3 models (GRACE ACS model, our complete medical record model and medical record front page model), separately. Then we calculated the AUC of each model and test the statistical difference between GRACE and our models. Integrated discrimination improvement (IDI) was also calculated to evaluate the overall improvement of our models compared with GRACE. Results showed that compared with GRACE ACS model, both our two patient risk prediction models had better AUC (all  $p$  value  $< 0.001$ , see following Figure) and positive IDI among development and validation cohorts. In detail, the IDI of medical record front page model compared with GRACE model was 0.010 (0.003, 0.017) in development cohort, and 0.028 (0.021, 0.036) in validation cohort.

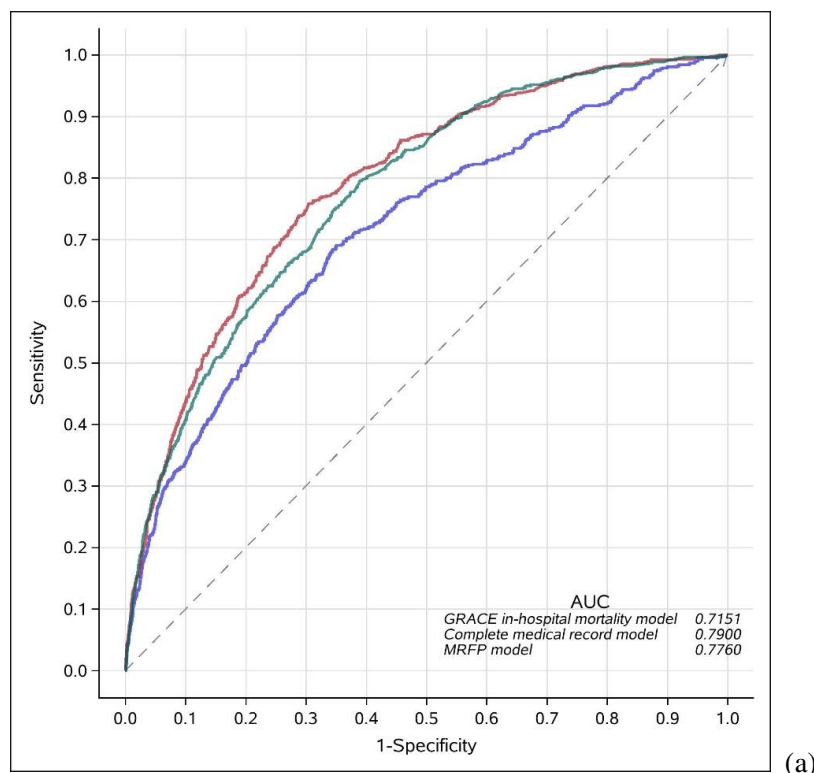

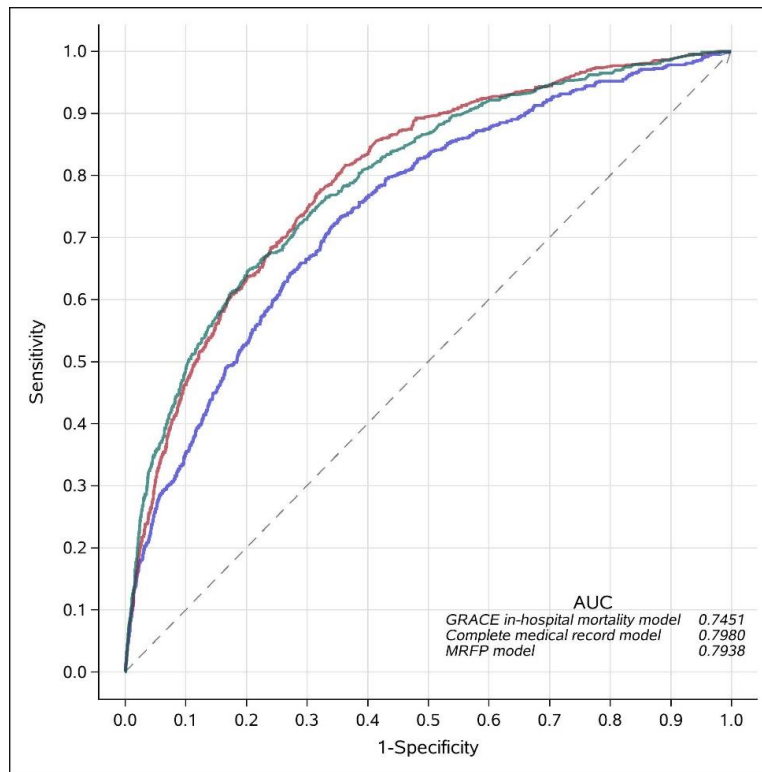

(b)

**Figure. ROC of 3 models among development(a) and validation(b) cohort.**

**Figure S2. Receiver operating characteristic (ROC) curve of MRFP model and complete medical record model based on modelling and validation cohorts.**

MRFP: medical record front page.

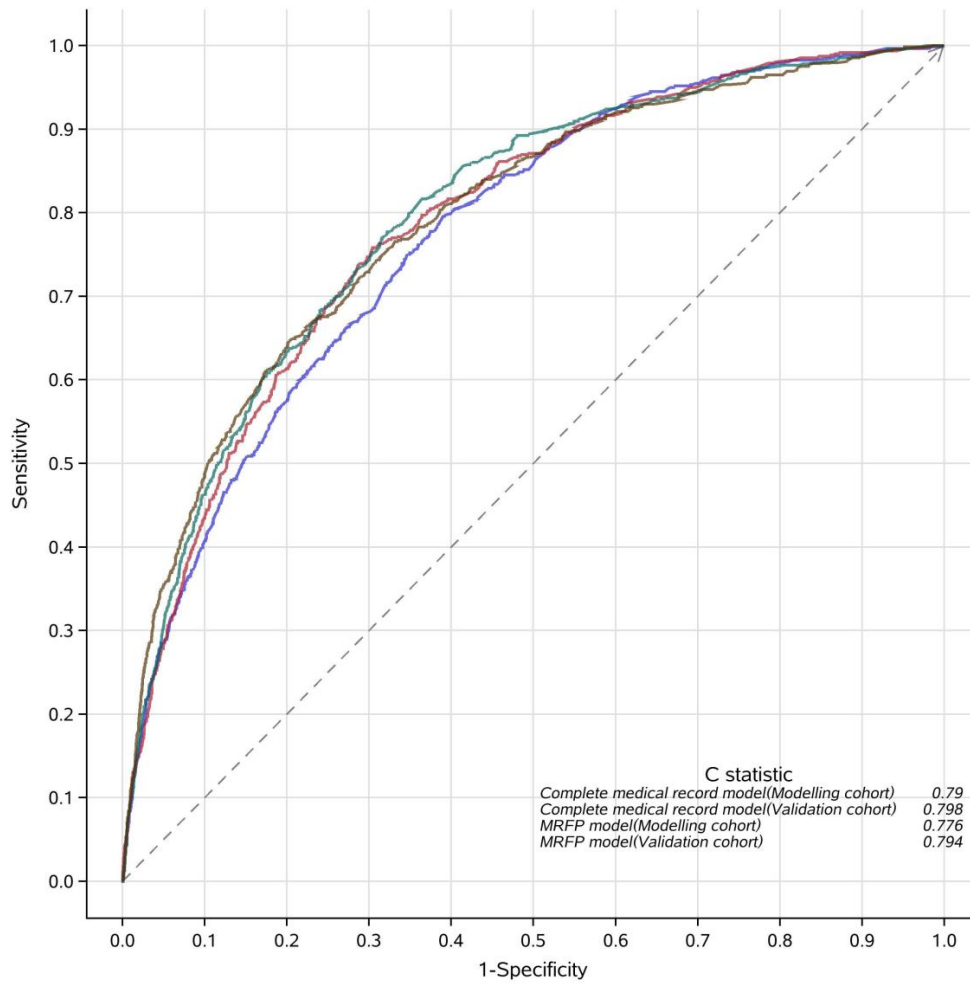



**Figure S3. Distribution of risk standardized mortality rate of study hospitals estimated by MRFP model. (a) Modelling cohort (b) Validation cohort**

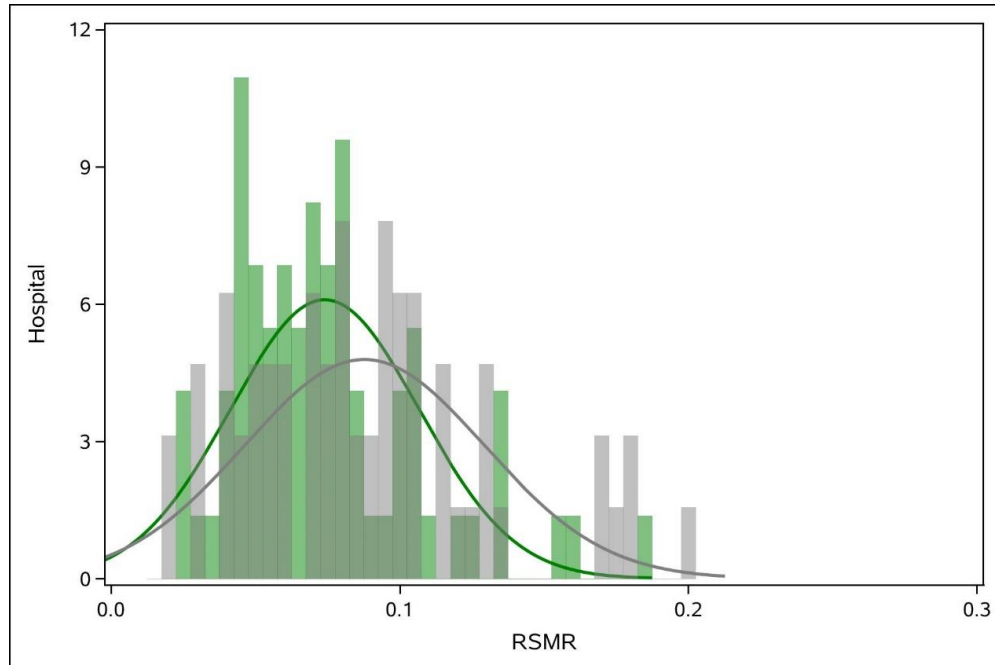

(a)

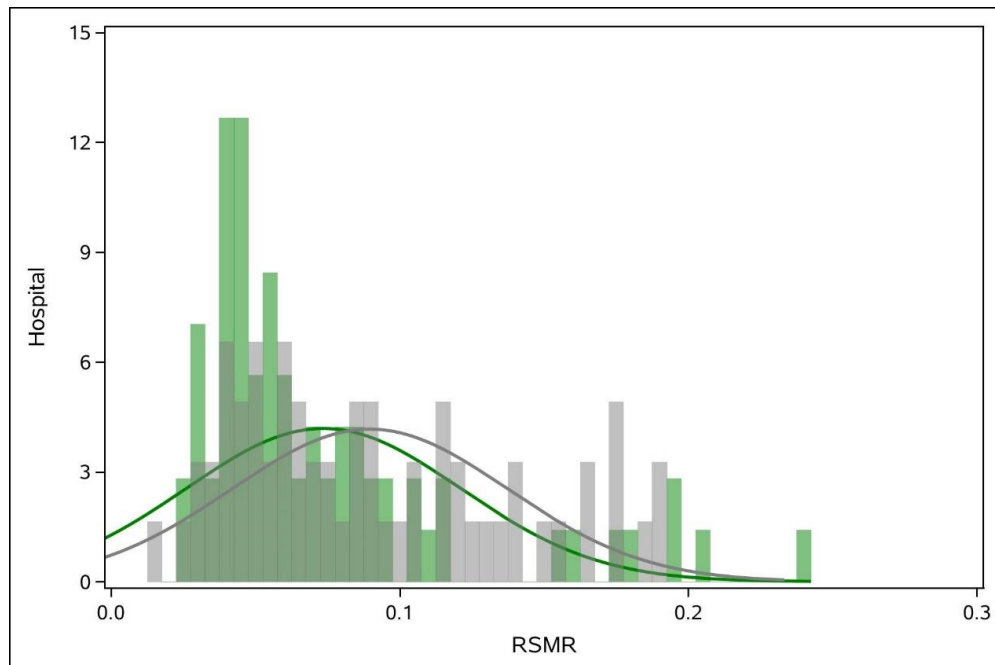

(b)
